# Supplementary material for: Dual-seq transcriptomics reveals the battle for iron during Pseudomonas aeruginosa acute murine pneumonia
Source: PubMed Central journal article supplement (PMC5159919; doi:10.1038/srep39172), 2016-12-16
Supplement: srep39172-s1.pdf [file srep39172-s1.pdf]

## SUPPLEMENTARY INFORMATION

### Dual-seq transcriptomics reveals the battle for iron during *Pseudomonas aeruginosa* acute murine pneumonia

F. Heath Damron, Amanda G. Oglesby-Sherrouse, Angela Wilks, Mariette Barbier

**Table S1: Changes in bacterial gene expression in response to infection measured by RNA-seq.**

Fold changes greater than 1 indicate that the gene was up-regulated during infection compared to *in vitro* growth conditions. Fold changes inferior to -1 indicate that the gene was down-regulated during infection compared to *in vitro* growth conditions.

| Locus   | Gene           | Fold change | P-value  |
|---------|----------------|-------------|----------|
| PA0694  | <i>exbD2</i>   | - inf       | 3.75E-29 |
| PA0700  | <i>PA0700</i>  | - inf       | 1.95E-20 |
| PA1355  | <i>PA1355</i>  | - inf       | 4.89E-21 |
| PA1744  | <i>PA1744</i>  | - inf       | 4.26E-05 |
| PA2140  | <i>PA2140</i>  | - inf       | 3.9E-20  |
| PA2141  | <i>PA2141</i>  | - inf       | 2.45E-21 |
| PA2142a | <i>PA2142a</i> | - inf       | 8.5E-107 |
| PA2149  | <i>PA2149</i>  | - inf       | 3.57E-50 |
| PA2161  | <i>PA2161</i>  | - inf       | 9.03E-45 |
| PA2170  | <i>PA2170</i>  | - inf       | 4.49E-29 |
| PA2183  | <i>PA2183</i>  | - inf       | 2.85E-46 |
| PA4210  | <i>phzA1</i>   | - inf       | 3.62E-41 |
| PA3407  | <i>hasAp</i>   | 339.4891531 | 0        |
| PA3406  | <i>hasD</i>    | 293.6076547 | 1.1E-134 |
| PA3405  | <i>hasE</i>    | 214.3144174 | 9.2E-156 |
| PA3408  | <i>hasR</i>    | 78.77775938 | 6E-150   |
| PA3432  | <i>PA3432</i>  | 68.45287349 | 5E-113   |
| PA0046  | <i>PA0046</i>  | 66.84638796 | 2.5E-182 |
| PA0045  | <i>PA0045</i>  | 59.74432959 | 1.1E-118 |
| PA1724  | <i>pscK</i>    | 59.64410648 | 4.73E-64 |
| PA1702  | <i>PA1702</i>  | 58.71038873 | 2.3E-109 |
| PA4219  | <i>PA4219</i>  | 58.38546057 | 1.5E-140 |
| PA1696  | <i>pscO</i>    | 58.05630774 | 7.23E-70 |
| PA4229  | <i>pchC</i>    | 50.32981535 | 2.4E-169 |
| PA4228  | <i>pchD</i>    | 49.83010385 | 4.4E-179 |
| PA4220  | <i>PA4220</i>  | 48.71531486 | 7.5E-127 |
| PA1701  | <i>PA1701</i>  | 47.10390838 | 3.64E-52 |
| PA1700  | <i>PA1700</i>  | 45.14675909 | 6.9E-113 |
| PA4218  | <i>PA4218</i>  | 43.72936932 | 8.9E-167 |
| PA4221  | <i>fptA</i>    | 41.90985241 | 5.8E-204 |
| PA4230  | <i>pchB</i>    | 41.25121602 | 1.5E-229 |

|        |               |             |          |
|--------|---------------|-------------|----------|
| PA1698 | <i>popN</i>   | 40.3665478  | 1.2E-141 |
| PA4231 | <i>pchA</i>   | 40.04091029 | 7.08E-62 |
| PA3901 | <i>fecA</i>   | 40.01679069 | 4.7E-164 |
| PA1721 | <i>pscH</i>   | 38.72981228 | 2.6E-105 |
| PA1722 | <i>pscl</i>   | 37.94947723 | 8.4E-165 |
| PA1720 | <i>pscG</i>   | 34.72730905 | 4.3E-135 |
| PA0047 | <i>PA0047</i> | 34.17466692 | 6.1E-134 |
| PA1697 | <i>PA1697</i> | 33.93577148 | 2.6E-122 |
| PA1717 | <i>pscD</i>   | 33.87041724 | 4E-119   |
| PA0781 | <i>PA0781</i> | 32.46185586 | 8.68E-81 |
| PA1715 | <i>pscB</i>   | 32.21254695 | 4.36E-88 |
| PA1699 | <i>PA1699</i> | 32.14906382 | 7.3E-143 |
| PA1723 | <i>pscJ</i>   | 31.38739188 | 9.85E-94 |
| PA4710 | <i>phuR</i>   | 29.46457619 | 1.5E-131 |
| PA1725 | <i>pscl</i>   | 29.43609137 | 4.73E-91 |
| PA0044 | <i>exoT</i>   | 28.99746348 | 4.1E-198 |
| PA3431 | <i>PA3431</i> | 28.18865328 | 8.33E-68 |
| PA0252 | <i>PA0252</i> | 26.2462289  | 8.48E-76 |
| PA1692 | <i>PA1692</i> | 25.89662161 | 3.42E-50 |
| PA4222 | <i>PA4222</i> | 25.72795345 | 1.5E-125 |
| PA1673 | <i>PA1673</i> | 25.55033365 | 1.2E-175 |
| PA4223 | <i>PA4223</i> | 25.33171536 | 1.4E-152 |
| PA1695 | <i>pscP</i>   | 24.57378507 | 6.27E-80 |
| PA1716 | <i>pscC</i>   | 24.17878864 | 1.9E-142 |
| PA4224 | <i>pchG</i>   | 24.08912465 | 3.2E-142 |
| PA4225 | <i>pchF</i>   | 23.92644285 | 1.1E-171 |
| PA1719 | <i>pscF</i>   | 23.73656242 | 2.1E-141 |
| PA3284 | <i>PA3284</i> | 23.72388031 | 1.4E-223 |
| PA1708 | <i>popB</i>   | 23.46316687 | 2.71E-64 |
| PA1709 | <i>popD</i>   | 22.99047857 | 5.87E-60 |
| PA1556 | <i>ccoO2</i>  | 22.05988275 | 4.4E-206 |
| PA4616 | <i>PA4616</i> | 21.70948942 | 3.3E-120 |
| PA4226 | <i>pchE</i>   | 21.63037759 | 3.3E-153 |
| PA1321 | <i>cyoE</i>   | 21.58802996 | 2.03E-39 |
| PA1694 | <i>pscQ</i>   | 21.35266541 | 6.4E-68  |
| PA4470 | <i>fumC1</i>  | 20.73265425 | 6.7E-169 |
| PA1913 | <i>PA1913</i> | 20.38996564 | 3.4E-79  |
| PA1557 | <i>ccoN2</i>  | 20.35559448 | 6.8E-210 |
| PA5374 | <i>betI</i>   | 19.96273641 | 2.1E-158 |
| PA0170 | <i>PA0170</i> | 19.55395549 | 7.83E-20 |
| PA4227 | <i>pchR</i>   | 19.41122071 | 4.9E-108 |
| PA3877 | <i>narK1</i>  | 19.20335595 | 2.3E-142 |
| PA1718 | <i>pscE</i>   | 18.96015184 | 2.8E-151 |

|          |               |             |          |
|----------|---------------|-------------|----------|
| PA4836   | <i>PA4836</i> | 18.88411805 | 9.67E-56 |
| PA1555   | <i>ccoP2</i>  | 18.85787323 | 3.1E-163 |
| PA1691   | <i>pscT</i>   | 18.83512065 | 9.35E-31 |
| PA2203   | <i>PA2203</i> | 18.64286815 | 7.39E-11 |
| PA3610   | <i>potD</i>   | 18.57233132 | 2.89E-49 |
| PA3283   | <i>PA3283</i> | 18.31026425 | 1.5E-156 |
| PA1704   | <i>pcrR</i>   | 18.16689231 | 1.95E-44 |
| PA3409   | <i>PA3409</i> | 18.11019455 | 2.48E-22 |
| PA4895   | <i>PA4895</i> | 17.8386417  | 1.93E-22 |
| PA5440   | <i>PA5440</i> | 17.72112204 | 1.4E-136 |
| PA0165   | <i>PA0165</i> | 17.13722144 | 3.5E-144 |
| PA5373   | <i>betB</i>   | 16.78697354 | 1E-143   |
| PA5372   | <i>betA</i>   | 16.54674367 | 5.9E-137 |
| PA1703   | <i>pcrD</i>   | 16.48331315 | 3.5E-128 |
| PA4709   | <i>PA4709</i> | 16.12258907 | 3.8E-108 |
| PA1713   | <i>exsA</i>   | 15.77754998 | 1.4E-158 |
| PA4896   | <i>PA4896</i> | 15.57229171 | 3.89E-25 |
| PA3237   | <i>PA3237</i> | 15.2513981  | 5.34E-25 |
| PA4599   | <i>mexC</i>   | 15.06556594 | 3.52E-23 |
| PA4837   | <i>PA4837</i> | 15.02333649 | 6.53E-55 |
| PA1555.1 | <i>ccoQ2</i>  | 14.95262457 | 1.2E-166 |
| PA3841   | <i>exoS</i>   | 14.50797821 | 9.5E-46  |
| PA2463   | <i>PA2463</i> | 14.41908634 | 8.6E-25  |
| PA3282   | <i>PA3282</i> | 14.38693082 | 3.56E-62 |
| PA4771   | <i>lldD</i>   | 14.30898075 | 2.31E-91 |
| PA4252   | <i>rplX</i>   | 14.10343814 | 8.31E-65 |
| PA1791   | <i>PA1791</i> | 13.5345806  | 1.84E-64 |
| PA1196   | <i>PA1196</i> | 13.50402262 | 7.05E-58 |
| PA2451   | <i>PA2451</i> | 13.1633457  | 2.3E-115 |
| PA4262   | <i>rplD</i>   | 12.85051191 | 4.73E-76 |
| PA4772   | <i>PA4772</i> | 12.8383315  | 2.09E-55 |
| PA4386   | <i>groES</i>  | 12.82660864 | 6.3E-175 |
| PA1714   | <i>exsD</i>   | 12.62609474 | 1E-157   |
| PA3404   | <i>PA3404</i> | 12.59653504 | 7.02E-74 |
| PA4855   | <i>purD</i>   | 12.59182528 | 4.1E-168 |
| PA4932   | <i>rplI</i>   | 12.42599807 | 5.54E-83 |
| PA4933   | <i>PA4933</i> | 12.41559284 | 1.92E-55 |
| PA1319   | <i>cyoC</i>   | 12.41258152 | 1.13E-40 |
| PA4843   | <i>PA4843</i> | 12.31394549 | 2.2E-105 |
| PA1228   | <i>PA1228</i> | 12.20183808 | 3.86E-25 |
| PA1999   | <i>dhcA</i>   | 12.19413013 | 3.7E-155 |
| PA3900   | <i>PA3900</i> | 12.19011776 | 1.85E-11 |
| PA2453   | <i>PA2453</i> | 11.91279036 | 1.62E-40 |

|          |                 |             |          |
|----------|-----------------|-------------|----------|
| PA3278   | <i>PA3278</i>   | 11.88009383 | 9.43E-64 |
| PA1320   | <i>cyoD</i>     | 11.86154614 | 1.15E-14 |
| PA1277   | <i>cobQ</i>     | 11.64908241 | 1.23E-30 |
| PA4585   | <i>rtcA</i>     | 11.61308503 | 3.58E-27 |
| PA2126   | <i>PA2126</i>   | 11.5188207  | 7.68E-26 |
| PA4256   | <i>rplP</i>     | 11.47208015 | 3.41E-65 |
| PA4690.2 | <i>PA4690.2</i> | 11.40442872 | 6.57E-16 |
| PA3880   | <i>PA3880</i>   | 11.4025707  | 2.24E-38 |
| PA5369.2 | <i>PA5369.2</i> | 11.2871496  | 2.4E-17  |
| PA4271   | <i>rplL</i>     | 11.19055005 | 4.18E-69 |
| PA3641   | <i>PA3641</i>   | 10.97069899 | 8.3E-175 |
| PA4257   | <i>rpsC</i>     | 10.94734428 | 1.43E-55 |
| PA4761   | <i>dnaK</i>     | 10.94321744 | 1.76E-47 |
| PA4708   | <i>phuT</i>     | 10.93383482 | 3.8E-103 |
| PA3410   | <i>PA3410</i>   | 10.89577291 | 1.54E-16 |
| PA4613   | <i>katB</i>     | 10.80761466 | 6.63E-82 |
| PA1911   | <i>femR</i>     | 10.78522021 | 1.13E-10 |
| PA4348   | <i>PA4348</i>   | 10.75261624 | 1.4E-176 |
| PA4251   | <i>rplE</i>     | 10.61098896 | 1.18E-74 |
| PA1274   | <i>PA1274</i>   | 10.52354887 | 1.5E-28  |
| PA4280.2 | <i>PA4280.2</i> | 10.51680495 | 2.81E-29 |
| PA3727   | <i>PA3727</i>   | 10.46978605 | 6.01E-58 |
| PA4254   | <i>rpsQ</i>     | 10.42821426 | 2.54E-57 |
| PA1279   | <i>cobU</i>     | 10.38298414 | 1.26E-27 |
| PA1596   | <i>htpG</i>     | 10.3526677  | 1.9E-169 |
| PA1706   | <i>pcrV</i>     | 10.29492997 | 1.5E-151 |
| PA3608   | <i>potB</i>     | 10.26661471 | 8.78E-22 |
| PA3337   | <i>rfaD</i>     | 10.25584227 | 9.7E-128 |
| PA0545   | <i>PA0545</i>   | 10.18691807 | 1.99E-57 |
| PA4571   | <i>PA4571</i>   | 10.15595128 | 2.8E-131 |
| PA3609   | <i>potC</i>     | 10.12217696 | 5.57E-14 |
| PA5555   | <i>atpG</i>     | 10.02693492 | 8.07E-53 |
| PA5375   | <i>betT1</i>    | 9.8931015   | 3.11E-64 |
| PA1705   | <i>pcrG</i>     | 9.84705053  | 5.47E-95 |
| PA4586   | <i>PA4586</i>   | 9.840104501 | 1.61E-46 |
| PA1276   | <i>cobC</i>     | 9.818491108 | 2.32E-15 |
| PA4155   | <i>PA4155</i>   | 9.64812797  | 4.37E-11 |
| PA4307   | <i>pctC</i>     | 9.613404862 | 8.4E-111 |
| PA4762   | <i>grpE</i>     | 9.600370908 | 6.7E-152 |
| PA4272   | <i>rplJ</i>     | 9.514645785 | 8.32E-60 |
| PA2004   | <i>PA2004</i>   | 9.424067734 | 1.28E-28 |
| PA1270   | <i>PA1270</i>   | 9.388715906 | 2.42E-05 |
| PA4385   | <i>groEL</i>    | 9.380673848 | 9.66E-60 |

|        |               |             |          |
|--------|---------------|-------------|----------|
| PA1707 | <i>pcrH</i>   | 9.336339675 | 1.8E-152 |
| PA4260 | <i>rplB</i>   | 9.295453065 | 4.28E-61 |
| PA2753 | <i>PA2753</i> | 9.282953395 | 4.5E-117 |
| PA0171 | <i>PA0171</i> | 9.271731341 | 3.86E-18 |
| PA4468 | <i>sodM</i>   | 9.265359241 | 2.1E-145 |
| PA4250 | <i>rpsN</i>   | 9.206715199 | 1.2E-210 |
| PA4760 | <i>dnaJ</i>   | 9.199396224 | 7.9E-125 |
| PA2034 | <i>PA2034</i> | 9.16381777  | 1.45E-55 |
| PA4918 | <i>PA4918</i> | 9.153411051 | 5.99E-91 |
| PA3742 | <i>rplS</i>   | 9.138739083 | 1.5E-46  |
| PA2000 | <i>dhcB</i>   | 9.086790929 | 9E-141   |
| PA5404 | <i>PA5404</i> | 8.978370376 | 1.26E-09 |
| PA0277 | <i>PA0277</i> | 8.959335788 | 1.29E-58 |
| PA4467 | <i>PA4467</i> | 8.829437722 | 8.5E-135 |
| PA4469 | <i>PA4469</i> | 8.811967203 | 9.1E-140 |
| PA3600 | <i>PA3600</i> | 8.80061797  | 1.52E-27 |
| PA2500 | <i>PA2500</i> | 8.652225413 | 5.19E-30 |
| PA0625 | <i>PA0625</i> | 8.631090875 | 9.7E-108 |
| PA5139 | <i>PA5139</i> | 8.606228968 | 2.92E-82 |
| PA2033 | <i>PA2033</i> | 8.579612772 | 4E-125   |
| PA4261 | <i>rplW</i>   | 8.542051598 | 1.75E-58 |
| PA5553 | <i>atpC</i>   | 8.514482906 | 3.1E-212 |
| PA2459 | <i>PA2459</i> | 8.471031175 | 2.67E-12 |
| PA4835 | <i>PA4835</i> | 8.377989004 | 8.89E-22 |
| PA5558 | <i>atpF</i>   | 8.342940247 | 1.07E-42 |
| PA1278 | <i>cobP</i>   | 8.330431594 | 1.57E-21 |
| PA1690 | <i>pscU</i>   | 8.187709232 | 2.29E-16 |
| PA4759 | <i>dapB</i>   | 8.12355718  | 1.2E-134 |
| PA1912 | <i>femI</i>   | 8.121715653 | 9.27E-12 |
| PA4707 | <i>PA4707</i> | 8.112882244 | 8.04E-55 |
| PA0141 | <i>PA0141</i> | 8.106446738 | 1.3E-170 |
| PA1922 | <i>PA1922</i> | 8.079171085 | 0.000452 |
| PA3601 | <i>PA3601</i> | 8.045520837 | 5.5E-108 |
| PA4583 | <i>PA4583</i> | 8.03552245  | 2.6E-39  |
| PA0435 | <i>PA0435</i> | 8.028317622 | 2.37E-14 |
| PA3656 | <i>rpsB</i>   | 7.956916088 | 3.87E-57 |
| PA1317 | <i>cyoA</i>   | 7.905414027 | 1.26E-68 |
| PA1183 | <i>dctA</i>   | 7.802709305 | 8.64E-28 |
| PA2003 | <i>bdhA</i>   | 7.771212121 | 3E-98    |
| PA1546 | <i>hemN</i>   | 7.730943922 | 1.24E-82 |
| PA1275 | <i>cobD</i>   | 7.667547436 | 2.07E-13 |
| PA0639 | <i>PA0639</i> | 7.603263077 | 3.17E-38 |
| PA3876 | <i>narK2</i>  | 7.601207313 | 3.21E-29 |

|         |                |             |          |
|---------|----------------|-------------|----------|
| PA5556  | <i>atpA</i>    | 7.590522187 | 1.88E-46 |
| PA4471  | <i>PA4471</i>  | 7.549584578 | 7.2E-101 |
| PA2653  | <i>PA2653</i>  | 7.526931847 | 1.06E-32 |
| PA1281  | <i>cobV</i>    | 7.524686959 | 5.75E-10 |
| PA4854  | <i>purH</i>    | 7.521827114 | 2.3E-149 |
| PA4238  | <i>rpoA</i>    | 7.456125941 | 2.64E-50 |
| PA4894  | <i>PA4894</i>  | 7.436465606 | 0.00042  |
| PA5469  | <i>PA5469</i>  | 7.419294505 | 7.48E-26 |
| PA2398  | <i>fpvA</i>    | 7.406655617 | 4.19E-88 |
| PA2127  | <i>PA2127</i>  | 7.297889752 | 2.34E-77 |
| PA1301  | <i>PA1301</i>  | 7.121118861 | 2.02E-25 |
| PA1280  | <i>PA1280</i>  | 7.064889357 | 1.47E-12 |
| PA3268  | <i>PA3268</i>  | 6.999640049 | 1.26E-20 |
| PA4675  | <i>PA4675</i>  | 6.997000637 | 2.59E-58 |
| PA1273  | <i>cobB</i>    | 6.963448783 | 1.53E-20 |
| PA1771  | <i>estX</i>    | 6.947504924 | 2.11E-17 |
| PA4240  | <i>rpsK</i>    | 6.945353013 | 1.66E-49 |
| PA3899  | <i>PA3899</i>  | 6.930931168 | 3.51E-18 |
| PA3662  | <i>PA3662</i>  | 6.88858594  | 1.3E-22  |
| PA5554  | <i>atpD</i>    | 6.841290531 | 1.7E-44  |
| PA0672  | <i>hemO</i>    | 6.812340466 | 1.8E-136 |
| PA3865a | <i>PA3865a</i> | 6.811154957 | 7.06E-26 |
| PA4258  | <i>rplV</i>    | 6.800130804 | 2.48E-67 |
| PA2913  | <i>PA2913</i>  | 6.798132889 | 2.82E-10 |
| PA3839  | <i>PA3839</i>  | 6.728557515 | 5.62E-79 |
| PA0638  | <i>PA0638</i>  | 6.728312115 | 2.37E-31 |
| PA1588  | <i>sucC</i>    | 6.69422493  | 3.53E-49 |
| PA0618  | <i>PA0618</i>  | 6.686848486 | 7.28E-69 |
| PA4577  | <i>PA4577</i>  | 6.633283313 | 1.13E-33 |
| PA1271  | <i>PA1271</i>  | 6.613220969 | 1.84E-23 |
| PA5016  | <i>aceF</i>    | 6.602432648 | 2E-174   |
| PA0465  | <i>creD</i>    | 6.593765738 | 3.62E-16 |
| PA0631  | <i>PA0631</i>  | 6.577460027 | 1.26E-15 |
| PA3840  | <i>PA3840</i>  | 6.569000618 | 1.98E-78 |
| PA4263  | <i>rplC</i>    | 6.568728068 | 5.76E-46 |
| PA3713  | <i>spdH</i>    | 6.531298584 | 1.4E-81  |
| PA4269  | <i>rpoC</i>    | 6.462879984 | 3.01E-67 |
| PA4584  | <i>PA4584</i>  | 6.45875024  | 7.15E-10 |
| PA3913  | <i>PA3913</i>  | 6.452195623 | 6.23E-37 |
| PA0169  | <i>PA0169</i>  | 6.430738344 | 2.94E-14 |
| PA0624  | <i>PA0624</i>  | 6.398344181 | 5.24E-92 |
| PA4239  | <i>rpsD</i>    | 6.379406291 | 5.33E-47 |
| PA5568  | <i>PA5568</i>  | 6.374702899 | 3.5E-195 |

|        |               |             |          |
|--------|---------------|-------------|----------|
| PA1302 | <i>PA1302</i> | 6.350180816 | 1.84E-19 |
| PA0636 | <i>PA0636</i> | 6.342126191 | 4.07E-82 |
| PA4610 | <i>PA4610</i> | 6.340276767 | 4.25E-48 |
| PA4237 | <i>rplQ</i>   | 6.33352945  | 1.95E-43 |
| PA3728 | <i>PA3728</i> | 6.308840199 | 3.36E-43 |
| PA3933 | <i>PA3933</i> | 6.269877447 | 5.64E-50 |
| PA3082 | <i>gbt</i>    | 6.246324571 | 2.11E-58 |
| PA2912 | <i>PA2912</i> | 6.234191234 | 3.08E-06 |
| PA2204 | <i>PA2204</i> | 6.212100137 | 7.09E-93 |
| PA3729 | <i>PA3729</i> | 6.204202569 | 3.9E-124 |
| PA3081 | <i>PA3081</i> | 6.198571782 | 1.29E-31 |
| PA4273 | <i>rplA</i>   | 6.191011462 | 1.27E-65 |
| PA4744 | <i>infB</i>   | 6.170099994 | 5.22E-34 |
| PA4259 | <i>rpsS</i>   | 6.145227289 | 1.6E-148 |
| PA0637 | <i>PA0637</i> | 6.136651594 | 3.74E-27 |
| PA4919 | <i>pncB1</i>  | 6.105073739 | 3.5E-115 |
| PA4244 | <i>rplO</i>   | 6.094176534 | 1.07E-42 |
| PA2630 | <i>PA2630</i> | 6.085209284 | 2.56E-98 |
| PA5557 | <i>atpH</i>   | 6.001216563 | 2.6E-192 |
| PA4935 | <i>rpsF</i>   | 5.991251164 | 2.81E-64 |
| PA0162 | <i>opdC</i>   | 5.976975326 | 1.93E-20 |
| PA2905 | <i>cobH</i>   | 5.961671677 | 1.41E-07 |
| PA0626 | <i>PA0626</i> | 5.959943453 | 1.03E-33 |
| PA3730 | <i>PA3730</i> | 5.934252513 | 1.1E-16  |
| PA0628 | <i>PA0628</i> | 5.933946422 | 2.89E-28 |
| PA3842 | <i>PA3842</i> | 5.907591173 | 2.1E-134 |
| PA3887 | <i>nhaP</i>   | 5.844574649 | 9.9E-79  |
| PA0782 | <i>putA</i>   | 5.83828777  | 3.1E-116 |
| PA5539 | <i>PA5539</i> | 5.823474593 | 2.34E-06 |
| PA4266 | <i>fusA1</i>  | 5.761006003 | 8.07E-37 |
| PA4706 | <i>PA4706</i> | 5.760073391 | 5.74E-24 |
| PA4267 | <i>rpsG</i>   | 5.711642152 | 1.98E-80 |
| PA5535 | <i>PA5535</i> | 5.696920286 | 3.78E-24 |
| PA0403 | <i>pyrR</i>   | 5.677190353 | 7.57E-24 |
| PA2001 | <i>atoB</i>   | 5.658627379 | 2.9E-142 |
| PA1148 | <i>toxA</i>   | 5.6522242   | 8.9E-119 |
| PA4770 | <i>lldP</i>   | 5.650955391 | 5.08E-30 |
| PA0640 | <i>PA0640</i> | 5.626850441 | 3.92E-26 |
| PA3925 | <i>PA3925</i> | 5.615818917 | 2.33E-58 |
| PA0434 | <i>PA0434</i> | 5.614495747 | 3.21E-13 |
| PA4671 | <i>PA4671</i> | 5.595829497 | 2.48E-39 |
| PA2739 | <i>pheT</i>   | 5.595267953 | 2.4E-130 |
| PA2202 | <i>PA2202</i> | 5.576010473 | 1.63E-10 |

|        |               |             |          |
|--------|---------------|-------------|----------|
| PA0619 | <i>PA0619</i> | 5.551814536 | 2.8E-84  |
| PA4246 | <i>rpsE</i>   | 5.537195396 | 8.01E-35 |
| PA1318 | <i>cyoB</i>   | 5.534483751 | 4.13E-32 |
| PA0783 | <i>putP</i>   | 5.529541236 | 8.3E-100 |
| PA3820 | <i>secF</i>   | 5.512546988 | 7.3E-171 |
| PA4743 | <i>rbfA</i>   | 5.426137286 | 5.2E-122 |
| PA0755 | <i>opdH</i>   | 5.419109352 | 6.96E-15 |
| PA3607 | <i>potA</i>   | 5.396752379 | 6.58E-13 |
| PA3769 | <i>guaA</i>   | 5.381284627 | 1.9E-172 |
| PA4243 | <i>secY</i>   | 5.375350003 | 2.75E-33 |
| PA1601 | <i>PA1601</i> | 5.368107273 | 1.18E-17 |
| PA1300 | <i>PA1300</i> | 5.341660241 | 2.67E-15 |
| PA0641 | <i>PA0641</i> | 5.333825922 | 1.34E-28 |
| PA5054 | <i>hslU</i>   | 5.325013597 | 1.4E-113 |
| PA2903 | <i>cobJ</i>   | 5.316945152 | 1.09E-09 |
| PA4253 | <i>rplN</i>   | 5.30883948  | 1.86E-64 |
| PA2686 | <i>pfeR</i>   | 5.305214443 | 1.74E-22 |
| PA1693 | <i>pscR</i>   | 5.297350302 | 3.31E-44 |
| PA3281 | <i>PA3281</i> | 5.280275152 | 1.69E-26 |
| PA5402 | <i>PA5402</i> | 5.276787363 | 4.37E-15 |
| PA1589 | <i>sucD</i>   | 5.273941106 | 1.24E-62 |
| PA3000 | <i>aroP1</i>  | 5.258722011 | 1.35E-84 |
| PA0024 | <i>hemF</i>   | 5.247525844 | 3.18E-96 |
| PA4688 | <i>hitB</i>   | 5.240544163 | 3.62E-24 |
| PA2402 | <i>PA2402</i> | 5.231436442 | 4.2E-163 |
| PA0985 | <i>pyoS5</i>  | 5.207469632 | 9.19E-35 |
| PA4168 | <i>fpvB</i>   | 5.201317145 | 1.84E-22 |
| PA5559 | <i>atpE</i>   | 5.187200229 | 3.13E-47 |
| PA5072 | <i>PA5072</i> | 5.179163578 | 4.01E-36 |
| PA3631 | <i>PA3631</i> | 5.17032439  | 8.95E-80 |
| PA1805 | <i>ppiD</i>   | 5.16072948  | 3.8E-171 |
| PA2063 | <i>PA2063</i> | 5.148076461 | 1.19E-11 |
| PA4513 | <i>PA4513</i> | 5.143643813 | 2.6E-09  |
| PA1115 | <i>PA1115</i> | 5.131756582 | 2.17E-10 |
| PA0202 | <i>PA0202</i> | 5.127827923 | 1.82E-08 |
| PA2462 | <i>PA2462</i> | 5.112950122 | 1.12E-15 |
| PA4241 | <i>rpsM</i>   | 5.110951948 | 2.2E-183 |
| PA4247 | <i>rplR</i>   | 5.082182342 | 4.5E-34  |
| PA0751 | <i>PA0751</i> | 5.051718378 | 2.16E-08 |
| PA3821 | <i>secD</i>   | 5.046724676 | 1.8E-159 |
| PA0622 | <i>PA0622</i> | 5.018471416 | 1.4E-115 |
| PA5157 | <i>PA5157</i> | 5.00401407  | 2.37E-05 |
| PA2850 | <i>ohr</i>    | 5.001532846 | 1.06E-35 |



|          |                 |             |          |
|----------|-----------------|-------------|----------|
| PA5235   | <i>glpT</i>     | 4.987206322 | 1.26E-78 |
| PA0634   | <i>PA0634</i>   | 4.962193952 | 5.87E-63 |
| PA4268   | <i>rpsL</i>     | 4.960003402 | 9.82E-71 |
| PA0633   | <i>PA0633</i>   | 4.945419753 | 3.4E-89  |
| PA2976   | <i>rne</i>      | 4.945379234 | 4.4E-90  |
| PA0416   | <i>chpD</i>     | 4.925176424 | 1.38E-13 |
| PA3651   | <i>cdsA</i>     | 4.923212201 | 6.5E-106 |
| PA4270   | <i>rpoB</i>     | 4.914644724 | 1.24E-26 |
| PA3018   | <i>PA3018</i>   | 4.914166687 | 9.17E-31 |
| PA2904   | <i>cobI</i>     | 4.901978753 | 7.01E-24 |
| PA3783   | <i>PA3783</i>   | 4.890705837 | 1.63E-42 |
| PA3912   | <i>PA3912</i>   | 4.884626327 | 1.41E-35 |
| PA4156   | <i>PA4156</i>   | 4.884054371 | 2.21E-07 |
| PA0563   | <i>PA0563</i>   | 4.875431177 | 2.9E-157 |
| PA5504   | <i>PA5504</i>   | 4.855614294 | 9E-79    |
| PA0527   | <i>dnr</i>      | 4.854277973 | 3E-117   |
| PA4673   | <i>PA4673</i>   | 4.812600911 | 9E-130   |
| PA5170   | <i>arcD</i>     | 4.791881719 | 4.7E-50  |
| PA4598   | <i>mexD</i>     | 4.783628212 | 1.58E-06 |
| PA0617   | <i>PA0617</i>   | 4.752597893 | 1.44E-24 |
| PA2392   | <i>pvdP</i>     | 4.706795917 | 6.5E-143 |
| PA4242   | <i>rpmJ</i>     | 4.6934931   | 3.77E-53 |
| PA1602   | <i>PA1602</i>   | 4.618575145 | 4.1E-10  |
| PA4280.5 | <i>PA4280.5</i> | 4.604193966 | 1.45E-05 |
| PA5207   | <i>PA5207</i>   | 4.603845284 | 1.61E-21 |
| PA1429   | <i>PA1429</i>   | 4.589995935 | 4.28E-30 |
| PA1712   | <i>exsB</i>     | 4.583089462 | 1.04E-74 |
| PA2400   | <i>pvdJ</i>     | 4.570848145 | 3.8E-150 |
| PA4923   | <i>PA4923</i>   | 4.55830534  | 9.63E-34 |
| PA2740   | <i>pheS</i>     | 4.54523313  | 3.5E-125 |
| PA0140   | <i>ahpF</i>     | 4.53054852  | 1.1E-102 |
| PA3866   | <i>PA3866</i>   | 4.523005441 | 2.2E-106 |
| PA2952   | <i>etfB</i>     | 4.518458473 | 1.57E-54 |
| PA3561   | <i>fruK</i>     | 4.512081931 | 2.26E-18 |
| PA0623   | <i>PA0623</i>   | 4.48603363  | 4.95E-30 |
| PA3458   | <i>PA3458</i>   | 4.478134158 | 1.99E-52 |
| PA3562   | <i>frul</i>     | 4.477296252 | 3.66E-14 |
| PA2399   | <i>pvdD</i>     | 4.465985006 | 4.92E-81 |
| PA3802   | <i>hisS</i>     | 4.418822004 | 1.4E-107 |
| PA0413   | <i>chpA</i>     | 4.411901366 | 9E-103   |
| PA0578   | <i>PA0578</i>   | 4.392560763 | 2.08E-51 |
| PA3643   | <i>lpxB</i>     | 4.379639114 | 5.31E-37 |
| PA0025   | <i>aroE</i>     | 4.377252228 | 1.77E-38 |

|        |               |             |          |
|--------|---------------|-------------|----------|
| PA4934 | <i>rpsR</i>   | 4.360791385 | 3.42E-84 |
| PA0627 | <i>PA0627</i> | 4.3591729   | 3.9E-06  |
| PA0126 | <i>PA0126</i> | 4.35873371  | 8.3E-23  |
| PA0150 | <i>PA0150</i> | 4.357047668 | 0.000568 |
| PA3124 | <i>PA3124</i> | 4.355577745 | 4.08E-10 |
| PA1405 | <i>PA1405</i> | 4.353083948 | 6.7E-06  |
| PA2191 | <i>exoY</i>   | 4.352128372 | 1.03E-39 |
| PA2396 | <i>pvdF</i>   | 4.315465833 | 1.1E-103 |
| PA2389 | <i>pvdR</i>   | 4.312155934 | 3E-102   |
| PA3716 | <i>PA3716</i> | 4.30335417  | 1.2E-108 |
| PA4920 | <i>nadE</i>   | 4.278826891 | 2.1E-110 |
| PA0048 | <i>PA0048</i> | 4.278674899 | 3.65E-12 |
| PA4249 | <i>rpsH</i>   | 4.258134038 | 1.33E-83 |
| PA1600 | <i>PA1600</i> | 4.243871794 | 2.79E-05 |
| PA0073 | <i>PA0073</i> | 4.236758153 | 1.22E-07 |
| PA2742 | <i>rpmI</i>   | 4.23256     | 2.75E-76 |
| PA0291 | <i>oprE</i>   | 4.222107831 | 2.81E-84 |
| PA3642 | <i>rnhB</i>   | 4.218010644 | 4.01E-33 |
| PA3441 | <i>PA3441</i> | 4.171339499 | 3.3E-09  |
| PA4621 | <i>PA4621</i> | 4.162397312 | 7.48E-11 |
| PA1597 | <i>PA1597</i> | 4.152516549 | 2.01E-42 |
| PA0352 | <i>PA0352</i> | 4.150089939 | 2.67E-19 |
| PA4248 | <i>rplF</i>   | 4.138338677 | 3.34E-55 |
| PA1161 | <i>rrmA</i>   | 4.135961945 | 9.37E-33 |
| PA3613 | <i>PA3613</i> | 4.124294188 | 1.6E-104 |
| PA5053 | <i>hslV</i>   | 4.106179633 | 3.23E-44 |
| PA4438 | <i>PA4438</i> | 4.103866674 | 3.45E-90 |
| PA4283 | <i>recD</i>   | 4.082945626 | 3.08E-17 |
| PA5508 | <i>PA5508</i> | 4.074212226 | 3.15E-10 |
| PA4004 | <i>PA4004</i> | 4.070321068 | 2.31E-34 |
| PA0941 | <i>PA0941</i> | 4.067699311 | 2.62E-08 |
| PA0402 | <i>pyrB</i>   | 4.048558077 | 1.63E-84 |
| PA4720 | <i>trmA</i>   | 4.038502571 | 2.01E-56 |
| PA5002 | <i>PA5002</i> | 4.033440967 | 9.85E-33 |
| PA0594 | <i>surA</i>   | 4.032449658 | 1.2E-123 |
| PA5208 | <i>PA5208</i> | 4.027257569 | 2.56E-40 |
| PA4588 | <i>gdhA</i>   | 4.024405644 | 4.27E-52 |
| PA3165 | <i>hisC2</i>  | 4.023507498 | 1E-104   |
| PA4705 | <i>PA4705</i> | 4.005730888 | 4.63E-17 |
| PA0149 | <i>PA0149</i> | 3.985250786 | 9.42E-06 |
| PA2951 | <i>etfA</i>   | 3.977434884 | 1.3E-99  |
| PA4724 | <i>PA4724</i> | 3.976139171 | 1.45E-14 |
| PA0412 | <i>pilK</i>   | 3.975940258 | 4.95E-91 |

|        |               |             |          |
|--------|---------------|-------------|----------|
| PA0414 | <i>chpB</i>   | 3.959333842 | 2.68E-17 |
| PA2390 | <i>pvdT</i>   | 3.956634891 | 4.08E-92 |
| PA1711 | <i>exsE</i>   | 3.944982785 | 6.7E-39  |
| PA3859 | <i>PA3859</i> | 3.913441439 | 8.36E-96 |
| PA2687 | <i>pfeS</i>   | 3.9084219   | 1.84E-06 |
| PA1790 | <i>PA1790</i> | 3.905809662 | 2.07E-28 |
| PA4628 | <i>lysP</i>   | 3.895842463 | 2.76E-25 |
| PA0411 | <i>pilJ</i>   | 3.888123352 | 9.4E-135 |
| PA2996 | <i>nqrD</i>   | 3.878589752 | 8.78E-36 |
| PA3114 | <i>truA</i>   | 3.87712045  | 4E-23    |
| speA_1 | <i>speA_1</i> | 3.85913043  | 1.01E-78 |
| PA4484 | <i>gatB</i>   | 3.848070844 | 1.1E-109 |
| PA5403 | <i>PA5403</i> | 3.836088823 | 1.14E-08 |
| PA2385 | <i>pvdQ</i>   | 3.831627132 | 2.62E-94 |
| PA3800 | <i>PA3800</i> | 3.830947231 | 7.9E-137 |
| PA3879 | <i>narL</i>   | 3.830813681 | 2.82E-32 |
| PA1971 | <i>braZ</i>   | 3.827481384 | 4.53E-06 |
| PA0316 | <i>serA</i>   | 3.824695024 | 4.2E-78  |
| PA4664 | <i>hemK</i>   | 3.817800675 | 1.2E-35  |
| PA3741 | <i>PA3741</i> | 3.817425858 | 3.83E-17 |
| PA5192 | <i>pckA</i>   | 3.817364001 | 2.53E-93 |
|        | <i>lpdG</i>   | 3.816039031 | 3.7E-161 |
| PA1959 | <i>bacA</i>   | 3.808059922 | 3.58E-19 |
| PA2840 | <i>PA2840</i> | 3.807325559 | 8.62E-80 |
| PA2969 | <i>plsX</i>   | 3.800113923 | 8.15E-70 |
| PA3700 | <i>lysS</i>   | 3.79071371  | 1.93E-87 |
| PA5201 | <i>PA5201</i> | 3.789933692 | 1.31E-73 |
| PA2391 | <i>opmQ</i>   | 3.781249692 | 2.61E-57 |
| PA4665 | <i>prfA</i>   | 3.780936187 | 2.15E-40 |
| PA2119 | <i>PA2119</i> | 3.780684828 | 1.73E-55 |
| PA3768 | <i>PA3768</i> | 3.76507769  | 1.83E-56 |
| PA4587 | <i>ccpR</i>   | 3.757351522 | 3.52E-75 |
| PA2413 | <i>pvdH</i>   | 3.751503157 | 2.57E-74 |
| PA3743 | <i>trmD</i>   | 3.736041074 | 3.91E-70 |
| PA0752 | <i>PA0752</i> | 3.734706551 | 1.88E-05 |
| PA3823 | <i>tgt</i>    | 3.726163804 | 4.69E-31 |
| PA0401 | <i>PA0401</i> | 3.706806582 | 5.2E-76  |
| PA5536 | <i>PA5536</i> | 3.701958286 | 1.54E-05 |
| PA3655 | <i>tsf</i>    | 3.700666481 | 2.22E-71 |
| PA3810 | <i>hscA</i>   | 3.690214897 | 3.04E-75 |
| PA5202 | <i>PA5202</i> | 3.686773348 | 2.8E-11  |
| PA2911 | <i>PA2911</i> | 3.67949699  | 0.000546 |
| PA2468 | <i>foxl</i>   | 3.676975843 | 2.73E-07 |

|        |               |             |          |
|--------|---------------|-------------|----------|
| PA0914 | <i>PA0914</i> | 3.67465247  | 6.5E-06  |
| PA2395 | <i>pvdO</i>   | 3.671833705 | 1.92E-82 |
| PA4428 | <i>sspA</i>   | 3.665404471 | 3.96E-31 |
| PA4432 | <i>rpsI</i>   | 3.660972149 | 2.49E-72 |
| PA0419 | <i>PA0419</i> | 3.652186415 | 6.24E-19 |
| PA3722 | <i>PA3722</i> | 3.651717406 | 9.22E-20 |
| PA0428 | <i>PA0428</i> | 3.634587936 | 1.9E-115 |
| PA3801 | <i>PA3801</i> | 3.615627632 | 3E-124   |
| PA0973 | <i>oprL</i>   | 3.610150914 | 1.08E-51 |
| PA2995 | <i>nqrE</i>   | 3.60590445  | 9.19E-42 |
| PA2386 | <i>pvdA</i>   | 3.603860578 | 7E-107   |
| PA4479 | <i>mreD</i>   | 3.603630365 | 8.25E-14 |
| PA0620 | <i>PA0620</i> | 3.593691546 | 1.7E-36  |
| PA3809 | <i>fdx2</i>   | 3.57947539  | 2.41E-36 |
| PA4740 | <i>pnp</i>    | 3.578544726 | 7.43E-90 |
| PA2450 | <i>PA2450</i> | 3.577527801 | 4.49E-30 |
| PA2229 | <i>PA2229</i> | 3.575610782 | 5.74E-09 |
| PA4196 | <i>bfiR</i>   | 3.574847811 | 0.000386 |
| PA2446 | <i>gcvH2</i>  | 3.572178391 | 1.1E-47  |
| PA4480 | <i>mreC</i>   | 3.571056407 | 3.37E-23 |
| PA5011 | <i>waaC</i>   | 3.565483666 | 7.2E-33  |
| PA5113 | <i>PA5113</i> | 3.562887249 | 1.47E-16 |
| PA3336 | <i>PA3336</i> | 3.551231777 | 3.5E-14  |
| PA1084 | <i>flgI</i>   | 3.550087513 | 1.75E-26 |
| PA2741 | <i>rplT</i>   | 3.531158195 | 1.01E-78 |
| PA5015 | <i>aceE</i>   | 3.530325165 | 7.83E-95 |
| PA1654 | <i>PA1654</i> | 3.527452759 | 9.24E-16 |
| PA3149 | <i>wbpH</i>   | 3.525775741 | 3.83E-60 |
| PA3147 | <i>wbpJ</i>   | 3.518172192 | 6.69E-43 |
| PA4277 | <i>tufB</i>   | 3.517778193 | 2.01E-97 |
| PA0295 | <i>PA0295</i> | 3.515853067 | 4.6E-25  |
| PA5564 | <i>gidB</i>   | 3.514716992 | 6.3E-52  |
| PA4568 | <i>rplU</i>   | 3.513988314 | 1.78E-87 |
| PA0018 | <i>fmt</i>    | 3.5086088   | 4.03E-24 |
| PA2929 | <i>PA2929</i> | 3.50714927  | 4.43E-06 |
| PA4834 | <i>PA4834</i> | 3.505788565 | 2.6E-06  |
| PA0774 | <i>PA0774</i> | 3.503102569 | 4.54E-12 |
| PA2973 | <i>PA2973</i> | 3.502192173 | 5.7E-60  |
| PA4274 | <i>rplK</i>   | 3.488836174 | 6.99E-68 |
| PA0526 | <i>PA0526</i> | 3.481888554 | 0.000664 |
| PA0201 | <i>PA0201</i> | 3.477382113 | 1.63E-38 |
| PA4255 | <i>rpmC</i>   | 3.474205653 | 1.34E-66 |
| PA0970 | <i>tolR</i>   | 3.470867942 | 1.44E-39 |

|        |               |             |          |
|--------|---------------|-------------|----------|
| PA3151 | <i>hisF2</i>  | 3.468726257 | 4.94E-24 |
| PA0008 | <i>glyS</i>   | 3.465469188 | 1.4E-60  |
| PA5003 | <i>PA5003</i> | 3.464240061 | 2.34E-32 |
| PA4280 | <i>birA</i>   | 3.453057007 | 2.11E-26 |
| PA2321 | <i>PA2321</i> | 3.450440518 | 5.32E-10 |
| PA4582 | <i>PA4582</i> | 3.444395528 | 4.33E-16 |
| PA5194 | <i>PA5194</i> | 3.442090961 | 2.91E-20 |
| PA2002 | <i>PA2002</i> | 3.441781411 | 8.55E-11 |
| PA5530 | <i>PA5530</i> | 3.434131443 | 1.17E-58 |
| PA0929 | <i>PA0929</i> | 3.432104113 | 8.95E-07 |
| PA2481 | <i>PA2481</i> | 3.431579083 | 1.67E-19 |
| PA5309 | <i>PA5309</i> | 3.428104272 | 1.34E-10 |
| PA0091 | <i>vgrG1</i>  | 3.422872427 | 1.39E-11 |
| PA1272 | <i>cobO</i>   | 3.421674653 | 8.98E-17 |
| PA5138 | <i>PA5138</i> | 3.420820698 | 1.91E-25 |
| PA0280 | <i>cysA</i>   | 3.418632289 | 6.97E-12 |
| PA3652 | <i>uppS</i>   | 3.414926879 | 4.76E-79 |
| PA3452 | <i>mqaA</i>   | 3.407644435 | 4.2E-76  |
| PA0768 | <i>lepB</i>   | 3.406949809 | 3.33E-36 |
| PA2393 | <i>PA2393</i> | 3.396074128 | 1.28E-70 |
| PA3308 | <i>hepA</i>   | 3.39371384  | 2.62E-42 |
| PA5562 | <i>spoOJ</i>  | 3.392309444 | 1.97E-60 |
| PA2611 | <i>cysG</i>   | 3.390025405 | 3.7E-36  |
| PA3148 | <i>wbpl</i>   | 3.387961222 | 5.23E-45 |
| PA2482 | <i>PA2482</i> | 3.385944554 | 1.3E-10  |
| PA4612 | <i>PA4612</i> | 3.380374666 | 4.24E-07 |
| PA2624 | <i>idh</i>    | 3.379928162 | 3.71E-65 |
| PA2997 | <i>nqrC</i>   | 3.37213968  | 1.8E-23  |
| PA0075 | <i>pppA</i>   | 3.365812545 | 2.14E-13 |
| PA1586 | <i>sucB</i>   | 3.361372674 | 8.91E-76 |
| PA3287 | <i>PA3287</i> | 3.336033611 | 2.26E-24 |
| PA0542 | <i>PA0542</i> | 3.334627701 | 2.93E-65 |
| PA3115 | <i>fimV</i>   | 3.334185377 | 1.38E-90 |
| PA4838 | <i>PA4838</i> | 3.329275436 | 9.4E-06  |
| PA2567 | <i>PA2567</i> | 3.325616798 | 5.9E-23  |
| PA4328 | <i>PA4328</i> | 3.31772054  | 8.37E-30 |
| PA5495 | <i>thrB</i>   | 3.317022464 | 1.19E-44 |
| PA3019 | <i>PA3019</i> | 3.30943652  | 3.56E-40 |
| PA4003 | <i>pbpA</i>   | 3.308326075 | 1.2E-21  |
| PA3152 | <i>hisH2</i>  | 3.30738021  | 7.96E-13 |
| PA3790 | <i>oprC</i>   | 3.307283448 | 7.21E-45 |
| PA0593 | <i>pdxA</i>   | 3.292657694 | 2.51E-23 |
| PA0836 | <i>ackA</i>   | 3.291143474 | 1.11E-41 |

|        |               |             |          |
|--------|---------------|-------------|----------|
| PA1240 | <i>PA1240</i> | 3.278402239 | 0.000731 |
| PA5075 | <i>PA5075</i> | 3.266842122 | 2.08E-29 |
| PA5560 | <i>atpB</i>   | 3.260006141 | 1.71E-96 |
| PA5049 | <i>rpmE</i>   | 3.257712797 | 1.11E-68 |
| PA4063 | <i>PA4063</i> | 3.250113021 | 1.62E-18 |
| PA3911 | <i>PA3911</i> | 3.248535969 | 2.47E-16 |
| PA3731 | <i>PA3731</i> | 3.242354047 | 1.45E-43 |
| PA5342 | <i>PA5342</i> | 3.241650409 | 6.86E-10 |
| PA3875 | <i>narG</i>   | 3.237069816 | 1.44E-15 |
| PA0787 | <i>PA0787</i> | 3.224305016 | 1.77E-06 |
| PA1517 | <i>PA1517</i> | 3.222062855 | 2.88E-15 |
| PA0086 | <i>PA0086</i> | 3.208344923 | 2.23E-13 |
| PA3146 | <i>wbpK</i>   | 3.198009614 | 1.96E-24 |
| PA1585 | <i>sucA</i>   | 3.195898672 | 1.11E-78 |
| PA3446 | <i>PA3446</i> | 3.190191691 | 7.64E-08 |
| PA4065 | <i>PA4065</i> | 3.189926324 | 3.89E-09 |
| PA4404 | <i>PA4404</i> | 3.188369593 | 2.55E-16 |
| PA3915 | <i>moaB1</i>  | 3.182348218 | 7.7E-21  |
| PA3824 | <i>queA</i>   | 3.176948395 | 3.34E-22 |
| PA2977 | <i>murB</i>   | 3.17489671  | 3.33E-25 |
| PA4921 | <i>PA4921</i> | 3.171397272 | 2.8E-10  |
| PA1303 | <i>PA1303</i> | 3.165975131 | 8.78E-06 |
| PA2994 | <i>nqrF</i>   | 3.162531189 | 1.38E-35 |
| PA5406 | <i>PA5406</i> | 3.159588992 | 8.42E-26 |
| PA2993 | <i>PA2993</i> | 3.157528633 | 1.69E-22 |
| PA1361 | <i>PA1361</i> | 3.157380784 | 2.66E-06 |
| PA5298 | <i>PA5298</i> | 3.150362247 | 5.74E-37 |
| PA4265 | <i>tufA</i>   | 3.148501729 | 1.89E-88 |
| PA3650 | <i>dxr</i>    | 3.147898694 | 3.55E-39 |
| PA0607 | <i>rpe</i>    | 3.141184708 | 2.15E-27 |
| PA3116 | <i>PA3116</i> | 3.139817799 | 4.17E-17 |
| PA0931 | <i>pirA</i>   | 3.136217545 | 1.45E-10 |
| PA0310 | <i>PA0310</i> | 3.134746839 | 3.57E-16 |
| PA0074 | <i>ppkA</i>   | 3.12985893  | 3.25E-10 |
| PA0356 | <i>PA0356</i> | 3.129277545 | 3.58E-15 |
| PA0433 | <i>PA0433</i> | 3.124079862 | 2.34E-06 |
| PA0621 | <i>PA0621</i> | 3.123798426 | 2.58E-14 |
| PA0078 | <i>PA0078</i> | 3.122580037 | 5.85E-11 |
| PA0615 | <i>PA0615</i> | 3.117283277 | 9.73E-26 |
| PA0948 | <i>PA0948</i> | 3.109001519 | 3.6E-12  |
| PA1104 | <i>flil</i>   | 3.099533642 | 6.08E-19 |
| PA0076 | <i>PA0076</i> | 3.098532884 | 1.39E-05 |
| PA5425 | <i>purK</i>   | 3.098269387 | 1.8E-36  |

|        |               |             |          |
|--------|---------------|-------------|----------|
| PA1097 | <i>fleQ</i>   | 3.09154578  | 4.39E-39 |
| PA0616 | <i>PA0616</i> | 3.091391527 | 6.53E-11 |
| PA4067 | <i>oprG</i>   | 3.091349062 | 5.27E-78 |
| PA3977 | <i>hemL</i>   | 3.076696775 | 1.77E-34 |
| PA1013 | <i>purC</i>   | 3.074480806 | 3.24E-47 |
| PA1746 | <i>PA1746</i> | 3.064949011 | 1.57E-38 |
| PA5472 | <i>PA5472</i> | 3.060162839 | 1.47E-16 |
| PA5051 | <i>argS</i>   | 3.060086504 | 1.98E-34 |
| PA4371 | <i>PA4371</i> | 3.049073093 | 1.14E-10 |
| PA1483 | <i>cycH</i>   | 3.047704813 | 9.44E-24 |
| PA0608 | <i>PA0608</i> | 3.044928421 | 3.08E-26 |
| PA2759 | <i>PA2759</i> | 3.044540595 | 2.83E-10 |
| PA5009 | <i>waaP</i>   | 3.040383788 | 3.05E-12 |
| PA4064 | <i>PA4064</i> | 3.036563701 | 6.47E-06 |
| PA3579 | <i>PA3579</i> | 3.035160621 | 1.07E-27 |
| PA3129 | <i>PA3129</i> | 3.034069549 | 5.7E-10  |
| PA1552 | <i>ccoP1</i>  | 3.024925215 | 1.32E-48 |
| PA2978 | <i>ptpA</i>   | 3.017021957 | 2.57E-13 |
| PA2906 | <i>PA2906</i> | 3.008716345 | 0.000147 |
| PA5343 | <i>PA5343</i> | 2.995014698 | 5.36E-19 |
| PA5486 | <i>PA5486</i> | 2.993898394 | 3.41E-10 |
| PA5010 | <i>waaG</i>   | 2.987110086 | 2.53E-28 |
| PA3632 | <i>PA3632</i> | 2.985355504 | 4.03E-35 |
| PA2735 | <i>PA2735</i> | 2.974409285 | 2.89E-38 |
| PA1050 | <i>PA1050</i> | 2.973910125 | 9.76E-20 |
| PA4356 | <i>xenB</i>   | 2.971578149 | 4.21E-13 |
| PA1647 | <i>PA1647</i> | 2.971029796 | 1.36E-06 |
| PA5012 | <i>waaF</i>   | 2.970373061 | 1.24E-27 |
| PA2480 | <i>PA2480</i> | 2.967398866 | 8.09E-07 |
| PA4694 | <i>ilvC</i>   | 2.962049562 | 2.51E-51 |
| PA4567 | <i>rpmA</i>   | 2.961061578 | 1.52E-27 |
| PA2394 | <i>pvdN</i>   | 2.959307886 | 1.67E-43 |
| PA5189 | <i>PA5189</i> | 2.958937057 | 7.54E-06 |
| PA5478 | <i>PA5478</i> | 2.958198835 | 1.25E-14 |
| PA4768 | <i>smpB</i>   | 2.938095304 | 3.55E-29 |
| PA1140 | <i>PA1140</i> | 2.937299773 | 1.29E-16 |
| PA5296 | <i>rep</i>    | 2.935002736 | 4.78E-25 |
| PA2667 | <i>PA2667</i> | 2.932911262 | 7.95E-45 |
| PA4323 | <i>PA4323</i> | 2.928493744 | 4.53E-12 |
| PA2692 | <i>PA2692</i> | 2.926983225 | 3.57E-08 |
| PA1056 | <i>PA1056</i> | 2.926767355 | 3.46E-10 |
| PA0964 | <i>pmpR</i>   | 2.924362428 | 1.37E-47 |
| PA5035 | <i>gltD</i>   | 2.917795177 | 1.71E-24 |

|          |                 |             |          |
|----------|-----------------|-------------|----------|
| PA1288   | <i>PA1288</i>   | 2.905942227 | 2.28E-44 |
| PA4051   | <i>thiL</i>     | 2.905638526 | 4.99E-14 |
| PA4162   | <i>PA4162</i>   | 2.901108003 | 0.000401 |
| PA0754   | <i>PA0754</i>   | 2.90095411  | 2.11E-08 |
| PA5004   | <i>PA5004</i>   | 2.898423557 | 1.13E-30 |
| PA3745   | <i>rpsP</i>     | 2.887278452 | 1.08E-27 |
| PA4278   | <i>PA4278</i>   | 2.883681905 | 1.05E-08 |
| PA4322   | <i>PA4322</i>   | 2.883003554 | 4.44E-20 |
| PA0070   | <i>PA0070</i>   | 2.880750495 | 7.84E-39 |
| PA4284   | <i>recB</i>     | 2.877023209 | 6.32E-12 |
| PA4558   | <i>PA4558</i>   | 2.875244662 | 9.06E-36 |
| PA5232   | <i>PA5232</i>   | 2.874899658 | 4.25E-42 |
| PA0387   | <i>PA0387</i>   | 2.873205846 | 1.61E-29 |
| PA3612   | <i>PA3612</i>   | 2.869494439 | 5.32E-10 |
| PA4559   | <i>lspA</i>     | 2.86864817  | 3.14E-29 |
| PA3666   | <i>dapD</i>     | 2.868107757 | 3.33E-35 |
| PA5204   | <i>argA</i>     | 2.865386008 | 2.52E-22 |
| PA1800   | <i>tig</i>      | 2.865140556 | 3.82E-77 |
| PA0390   | <i>metX</i>     | 2.85947655  | 4.57E-27 |
| PA2998   | <i>nqrB</i>     | 2.857677958 | 4.18E-35 |
| PA4988   | <i>waaA</i>     | 2.855386056 | 2.16E-08 |
| PA0944   | <i>purN</i>     | 2.843108719 | 2.74E-33 |
| PA5118   | <i>thiI</i>     | 2.843069951 | 2.45E-30 |
| PA5048   | <i>PA5048</i>   | 2.841356871 | 1.01E-19 |
| PA0969   | <i>tolQ</i>     | 2.841323725 | 8.39E-47 |
| PA2411   | <i>PA2411</i>   | 2.83785678  | 1.19E-50 |
| PA4429   | <i>PA4429</i>   | 2.832243654 | 3.53E-58 |
| PA0410   | <i>pill</i>     | 2.831662156 | 9.31E-30 |
| PA4754   | <i>PA4754</i>   | 2.829509883 | 3.51E-28 |
| PA3654   | <i>pyrH</i>     | 2.827091971 | 1.4E-31  |
| PA1926   | <i>PA1926</i>   | 2.824692972 | 2.65E-14 |
| PA0409   | <i>pilH</i>     | 2.8231592   | 1.81E-43 |
| PA5315   | <i>rpmG</i>     | 2.820337004 | 6.42E-21 |
| PA4686   | <i>PA4686</i>   | 2.814436287 | 5.78E-25 |
| PA4279   | <i>PA4279</i>   | 2.81294475  | 2.28E-12 |
| PA4358   | <i>PA4358</i>   | 2.811884412 | 3.83E-12 |
| PA4052   | <i>nusB</i>     | 2.807365367 | 1.12E-34 |
| PA5243   | <i>hemB</i>     | 2.804768437 | 7.74E-38 |
| PA5479   | <i>gltP</i>     | 2.804376404 | 1.42E-32 |
| PA3653   | <i>frr</i>      | 2.801580308 | 2.13E-37 |
| PA3604   | <i>erdR</i>     | 2.799208827 | 5.03E-22 |
| PA4272.1 | <i>PA4272.1</i> | 2.797578839 | 9.11E-35 |
| PA3984   | <i>Int</i>      | 2.794677904 | 6.99E-14 |



|        |               |             |          |
|--------|---------------|-------------|----------|
| PA2502 | <i>PA2502</i> | 2.783872998 | 0.000404 |
| PA2975 | <i>rluC</i>   | 2.782537974 | 3.95E-31 |
| PA5485 | <i>ampDh2</i> | 2.778972313 | 4.58E-16 |
| PA4292 | <i>PA4292</i> | 2.772183966 | 7.46E-32 |
| PA0017 | <i>PA0017</i> | 2.771695105 | 1.33E-17 |
| PA0582 | <i>folB</i>   | 2.770283518 | 4.06E-05 |
| PA4663 | <i>moeB</i>   | 2.767053973 | 1.09E-17 |
| PA4528 | <i>pilD</i>   | 2.764945649 | 1.39E-16 |
| PA5001 | <i>PA5001</i> | 2.758270942 | 5.42E-14 |
| PA0128 | <i>PA0128</i> | 2.756535672 | 1.04E-23 |
| PA3732 | <i>PA3732</i> | 2.754608869 | 4.07E-28 |
| PA3560 | <i>fruA</i>   | 2.746273301 | 0.000164 |
| PA1441 | <i>PA1441</i> | 2.743933769 | 1.99E-31 |
| PA5336 | <i>gmk</i>    | 2.742739611 | 1.09E-25 |
| PA0382 | <i>micA</i>   | 2.740632345 | 1.84E-15 |
| PA5503 | <i>PA5503</i> | 2.734027541 | 4.29E-22 |
| PA5109 | <i>PA5109</i> | 2.728534679 | 1.62E-29 |
| PA0519 | <i>nirS</i>   | 2.728143614 | 4.34E-14 |
| PA2251 | <i>PA2251</i> | 2.726235089 | 0.000989 |
| PA0892 | <i>aotP</i>   | 2.722982271 | 5.99E-17 |
| PA0079 | <i>PA0079</i> | 2.722271221 | 2.06E-12 |
| PA4370 | <i>icmP</i>   | 2.721544285 | 4.08E-42 |
| PA4640 | <i>mqoB</i>   | 2.72144927  | 7.21E-26 |
| PA1466 | <i>PA1466</i> | 2.71622711  | 0.000345 |
| PA3744 | <i>rimM</i>   | 2.715937726 | 7.87E-40 |
| PA3106 | <i>PA3106</i> | 2.712436833 | 6.69E-27 |
| PA3807 | <i>ndk</i>    | 2.712185007 | 5E-64    |
| PA2734 | <i>PA2734</i> | 2.711920462 | 9.22E-30 |
| PA5127 | <i>PA5127</i> | 2.711797065 | 4.14E-17 |
| PA4965 | <i>PA4965</i> | 2.711601031 | 2.13E-09 |
| PA1132 | <i>PA1132</i> | 2.709811837 | 3.18E-07 |
| PA0613 | <i>PA0613</i> | 2.709802237 | 2.43E-07 |
| PA3048 | <i>PA3048</i> | 2.709708765 | 1.22E-13 |
| PA0771 | <i>era</i>    | 2.704712215 | 5.98E-33 |
| PA5140 | <i>hisF1</i>  | 2.70093643  | 7.76E-24 |
| PA5129 | <i>grx</i>    | 2.700527404 | 2.48E-14 |
| PA0320 | <i>PA0320</i> | 2.697883105 | 3.05E-13 |
| PA1795 | <i>cysS</i>   | 2.697618182 | 3.23E-34 |
| PA1934 | <i>PA1934</i> | 2.685530156 | 3.8E-20  |
| PA0090 | <i>clpV1</i>  | 2.679725724 | 6.1E-12  |
| PA4698 | <i>PA4698</i> | 2.674854388 | 2.91E-08 |
| PA3163 | <i>cmk</i>    | 2.670343122 | 4.07E-32 |
| PA4655 | <i>hemH</i>   | 2.669767673 | 2.65E-20 |

|        |               |             |          |
|--------|---------------|-------------|----------|
| PA0635 | <i>PA0635</i> | 2.665125848 | 7.56E-08 |
| PA2964 | <i>pabC</i>   | 2.663119082 | 1.29E-17 |
| PA3228 | <i>PA3228</i> | 2.660797943 | 5.23E-09 |
| PA2619 | <i>infA</i>   | 2.658851523 | 1.23E-36 |
| PA2885 | <i>atuR</i>   | 2.657820172 | 0.000254 |
| PA3878 | <i>narX</i>   | 2.656721339 | 4.08E-11 |
| PA4373 | <i>PA4373</i> | 2.654540349 | 5.62E-18 |
| PA1792 | <i>PA1792</i> | 2.65095018  | 1.17E-15 |
| PA4427 | <i>sspB</i>   | 2.650055144 | 8.07E-25 |
| PA3183 | <i>zwf</i>    | 2.650017539 | 3.21E-32 |
| PA2748 | <i>PA2748</i> | 2.644979451 | 5.84E-11 |
| PA4569 | <i>ispB</i>   | 2.641620485 | 2.25E-22 |
| PA5236 | <i>PA5236</i> | 2.639404226 | 7.23E-15 |
| PA3603 | <i>dgkA</i>   | 2.635784742 | 7.01E-06 |
| PA0947 | <i>PA0947</i> | 2.632706157 | 1.08E-22 |
| PA3028 | <i>moeA2</i>  | 2.632221353 | 4.63E-21 |
|        | <i>mdoH</i>   | 2.630291279 | 3.57E-31 |
| PA2612 | <i>serS</i>   | 2.626275391 | 4.19E-28 |
| PA4458 | <i>PA4458</i> | 2.625072511 | 3.5E-28  |
| PA4672 | <i>PA4672</i> | 2.621077372 | 2.22E-24 |
| PA1549 | <i>PA1549</i> | 2.616406136 | 9.25E-14 |
| PA1043 | <i>PA1043</i> | 2.605858797 | 8.84E-07 |
| PA1710 | <i>exsC</i>   | 2.605754707 | 3.55E-25 |
| PA1085 | <i>flgJ</i>   | 2.595657266 | 1.89E-18 |
| PA1012 | <i>PA1012</i> | 2.592415083 | 1.23E-15 |
| PA0077 | <i>icmF1</i>  | 2.589175064 | 9.73E-09 |
| PA3646 | <i>lpxD</i>   | 2.588182039 | 1.91E-31 |
| PA1460 | <i>motC</i>   | 2.581475853 | 3.09E-17 |
| PA3678 | <i>PA3678</i> | 2.581133389 | 1.03E-08 |
| PA5052 | <i>PA5052</i> | 2.57515493  | 9.32E-18 |
| PA0087 | <i>PA0087</i> | 2.574167194 | 0.000167 |
| PA4372 | <i>PA4372</i> | 2.570590771 | 1.91E-23 |
| PA4050 | <i>pgpA</i>   | 2.569180206 | 1.36E-05 |
| PA3169 | <i>PA3169</i> | 2.565586624 | 1.76E-22 |
| PA0895 | <i>aruC</i>   | 2.563509842 | 5.23E-28 |
| PA2974 | <i>PA2974</i> | 2.554641776 | 2E-14    |
| PA4054 | <i>ribB</i>   | 2.55359775  | 9.36E-25 |
| PA4560 | <i>ileS</i>   | 2.552352478 | 1.44E-30 |
| PA2199 | <i>PA2199</i> | 2.551486451 | 1.8E-15  |
| PA0834 | <i>PA0834</i> | 2.548672745 | 1.26E-07 |
| PA3793 | <i>PA3793</i> | 2.547672845 | 3.54E-09 |
| PA1103 | <i>PA1103</i> | 2.547525937 | 9.86E-12 |
| PA3951 | <i>PA3951</i> | 2.545216256 | 0.000394 |

|          |               |             |          |
|----------|---------------|-------------|----------|
| PA1151   | <i>imm2</i>   | 2.544020531 | 2.59E-16 |
| PA2540   | <i>PA2540</i> | 2.543791929 | 7.3E-06  |
| PA4745   | <i>nusA</i>   | 2.543777033 | 3.44E-51 |
| PA1687   | <i>speE</i>   | 2.543016274 | 1.93E-14 |
| PA3989   | <i>holA</i>   | 2.540088703 | 4.02E-19 |
| PA0549   | <i>PA0549</i> | 2.539396389 | 1.63E-18 |
| PA1197   | <i>PA1197</i> | 2.537428857 | 2.56E-12 |
| PA4390   | <i>PA4390</i> | 2.535051742 | 6.6E-16  |
| PA3297   | <i>PA3297</i> | 2.534582992 | 1.39E-09 |
| PA4321   | <i>PA4321</i> | 2.530580258 | 2.19E-06 |
| PA0369   | <i>PA0369</i> | 2.530369664 | 4.85E-07 |
| PA5136   | <i>PA5136</i> | 2.530181688 | 7.8E-07  |
| PA4748   | <i>tpiA</i>   | 2.528958493 | 1.78E-49 |
| PA4996   | <i>rfaE</i>   | 2.526803446 | 2.68E-26 |
| PA5078   | <i>PA5078</i> | 2.526424905 | 7.35E-36 |
| PA0955   | <i>PA0955</i> | 2.525659184 | 5.51E-20 |
| PA4595   | <i>PA4595</i> | 2.52243578  | 1.17E-33 |
| PA3006   | <i>psrA</i>   | 2.522056163 | 5.56E-27 |
| PA3002   | <i>mfd</i>    | 2.520688971 | 5.99E-19 |
| PA1804   | <i>hupB</i>   | 2.517493017 | 2.08E-52 |
| PA1757   | <i>thrH</i>   | 2.514262909 | 3.55E-21 |
| PA0408   | <i>pilG</i>   | 2.513660741 | 1.7E-34  |
| PA5316   | <i>rpmB</i>   | 2.50183188  | 8.68E-28 |
| PA4439   | <i>trpS</i>   | 2.495126091 | 1.65E-24 |
| PA3150   | <i>wbpG</i>   | 2.493778252 | 5.12E-22 |
| PA5335   | <i>PA5335</i> | 2.492535639 | 1.58E-16 |
| PA5171   | <i>arcA</i>   | 2.492376871 | 7.7E-46  |
| PA4433   | <i>rplM</i>   | 2.491883745 | 1.74E-62 |
| PA4930   | <i>alr</i>    | 2.489928663 | 6.35E-10 |
| PA4730   | <i>panC</i>   | 2.488357197 | 1.23E-20 |
| PA4234   | <i>uvrA</i>   | 2.488041107 | 1.23E-23 |
| PA3861   | <i>rhl</i>    | 2.483529145 | 1.56E-31 |
| PA3735   | <i>thrC</i>   | 2.480304561 | 6.81E-24 |
| PA3162   | <i>rpsA</i>   | 2.480218843 | 2.09E-56 |
| PA1552.1 | <i>ccoQ1</i>  | 2.476336414 | 2.69E-15 |
| PA0085   | <i>hcp1</i>   | 2.47387516  | 2.78E-24 |
| PA0552   | <i>pgk</i>    | 2.469921342 | 2.81E-22 |
| PA3182   | <i>pgl</i>    | 2.469912505 | 2.31E-11 |
| PA4045   | <i>PA4045</i> | 2.468608014 | 1.25E-08 |
| PA0961   | <i>PA0961</i> | 2.465853058 | 1.04E-09 |
| PA4411   | <i>murC</i>   | 2.465003179 | 1.74E-24 |
| PA4053   | <i>ribE</i>   | 2.464185632 | 1.32E-39 |
| PA0799   | <i>PA0799</i> | 2.461102805 | 9.62E-07 |

|        |               |             |          |
|--------|---------------|-------------|----------|
| PA3634 | <i>PA3634</i> | 2.458509292 | 7.65E-19 |
| PA0281 | <i>cysW</i>   | 2.455458412 | 0.000291 |
| PA5043 | <i>pilN</i>   | 2.454981991 | 8.22E-28 |
| PA4408 | <i>ftsA</i>   | 2.452246673 | 1.02E-26 |
| PA5074 | <i>PA5074</i> | 2.443836024 | 9.43E-09 |
| PA5135 | <i>PA5135</i> | 2.441598196 | 4.35E-06 |
| PA5340 | <i>PA5340</i> | 2.437403712 | 2.67E-19 |
| PA2454 | <i>PA2454</i> | 2.437234407 | 2.56E-07 |
| PA1015 | <i>PA1015</i> | 2.436757444 | 6.65E-08 |
| PA2733 | <i>PA2733</i> | 2.435332151 | 1.05E-14 |
| PA5044 | <i>pilM</i>   | 2.431243158 | 2.37E-24 |
| PA3134 | <i>gltX</i>   | 2.422744693 | 2.4E-24  |
| PA2648 | <i>nuoM</i>   | 2.420438527 | 8E-21    |
| PA4068 | <i>PA4068</i> | 2.420309054 | 2.63E-14 |
| PA1452 | <i>flhA</i>   | 2.417218033 | 1.4E-11  |
| PA2044 | <i>PA2044</i> | 2.41674078  | 5.93E-15 |
| PA2019 | <i>PA2019</i> | 2.416255045 | 1.96E-05 |
| PA5007 | <i>PA5007</i> | 2.412816186 | 3E-12    |
| PA3644 | <i>lpxA</i>   | 2.40142743  | 2.1E-28  |
| PA4320 | <i>PA4320</i> | 2.399118486 | 5.58E-08 |
| PA3822 | <i>PA3822</i> | 2.395456041 | 2.31E-41 |
| PA5507 | <i>PA5507</i> | 2.394301288 | 1.58E-06 |
| PA4840 | <i>PA4840</i> | 2.39268337  | 1.01E-07 |
| PA3659 | <i>PA3659</i> | 2.392380428 | 1.87E-14 |
| PA1057 | <i>PA1057</i> | 2.391554009 | 0.000113 |
| PA3633 | <i>ygbP</i>   | 2.391192003 | 3.39E-08 |
| PA0945 | <i>purM</i>   | 2.385383606 | 1.53E-24 |
| PA0020 | <i>PA0020</i> | 2.383794794 | 3.38E-22 |
| PA5357 | <i>PA5357</i> | 2.382850165 | 7.97E-09 |
| PA4755 | <i>greA</i>   | 2.381040694 | 3.64E-23 |
| PA1846 | <i>cti</i>    | 2.373381353 | 6.11E-10 |
| PA1011 | <i>PA1011</i> | 2.370161032 | 2.28E-34 |
| PA4489 | <i>PA4489</i> | 2.368193366 | 9.97E-10 |
| PA5114 | <i>PA5114</i> | 2.367278652 | 0.000925 |
| PA4285 | <i>recC</i>   | 2.366681142 | 1.67E-08 |
| PA5304 | <i>dadA</i>   | 2.364729565 | 1.84E-18 |
| PA5141 | <i>hisA</i>   | 2.361566836 | 6.38E-11 |
| PA3931 | <i>PA3931</i> | 2.357924639 | 4.22E-06 |
| PA4202 | <i>PA4202</i> | 2.355735001 | 2.88E-07 |
| PA0915 | <i>PA0915</i> | 2.347737165 | 8.09E-06 |
| PA0400 | <i>PA0400</i> | 2.339742616 | 1.24E-27 |
| PA4566 | <i>obg</i>    | 2.336614717 | 5.49E-20 |
| PA1105 | <i>fliJ</i>   | 2.335752354 | 0.000161 |

|        |               |             |          |
|--------|---------------|-------------|----------|
| PA5569 | <i>rnpA</i>   | 2.331712638 | 1.12E-26 |
| PA4264 | <i>rpsJ</i>   | 2.32645166  | 1.72E-22 |
| PA3003 | <i>PA3003</i> | 2.326101725 | 6.83E-17 |
| PA0775 | <i>PA0775</i> | 2.325791211 | 4.14E-09 |
| PA4413 | <i>ftsW</i>   | 2.325084566 | 1.75E-14 |
| PA4966 | <i>PA4966</i> | 2.32358502  | 9.26E-11 |
| PA4415 | <i>mraY</i>   | 2.321451381 | 1.85E-19 |
| PA0767 | <i>lepA</i>   | 2.320795858 | 9.3E-21  |
| PA2770 | <i>PA2770</i> | 2.316600161 | 3.09E-14 |
| PA0963 | <i>aspS</i>   | 2.314346515 | 5E-27    |
| PA0485 | <i>PA0485</i> | 2.313974353 | 1.63E-07 |
| PA4565 | <i>proB</i>   | 2.313243702 | 5.79E-21 |
| PA3715 | <i>PA3715</i> | 2.309937334 | 0.000139 |
| PA0357 | <i>mutY</i>   | 2.309084662 | 2.03E-11 |
| PA4579 | <i>PA4579</i> | 2.30684994  | 3.72E-07 |
| PA0393 | <i>proC</i>   | 2.306665211 | 1.19E-11 |
| PA0341 | <i>lgt</i>    | 2.301886126 | 1.44E-09 |
| PA4750 | <i>folP</i>   | 2.300396601 | 3.65E-17 |
| PA0399 | <i>PA0399</i> | 2.300193188 | 2.91E-25 |
| PA0013 | <i>PA0013</i> | 2.298997471 | 0.000271 |
| PA2970 | <i>rpmF</i>   | 2.297285351 | 4.48E-09 |
| PA0427 | <i>oprM</i>   | 2.290386279 | 4.64E-26 |
| PA5128 | <i>secB</i>   | 2.289914346 | 8.74E-31 |
| PA0437 | <i>codA</i>   | 2.283084571 | 1.5E-08  |
| PA3159 | <i>wbpA</i>   | 2.280010286 | 6.46E-33 |
| PA5117 | <i>typA</i>   | 2.272278569 | 1.49E-34 |
| PA2425 | <i>pvdG</i>   | 2.271864014 | 9.77E-18 |
| PA4431 | <i>PA4431</i> | 2.271248973 | 6.9E-31  |
| PA3179 | <i>PA3179</i> | 2.267619731 | 3.59E-19 |
| PA3736 | <i>hom</i>    | 2.2672868   | 6.5E-17  |
| PA4488 | <i>PA4488</i> | 2.267182755 | 0.000806 |
| PA0835 | <i>pta</i>    | 2.263820479 | 2.41E-19 |
| PA5131 | <i>pgm</i>    | 2.253453546 | 2.48E-21 |
| PA5426 | <i>purE</i>   | 2.252308612 | 6.69E-17 |
| PA3838 | <i>PA3838</i> | 2.252068811 | 0.000174 |
| PA3014 | <i>faoA</i>   | 2.250778795 | 9.11E-34 |
| PA4066 | <i>PA4066</i> | 2.250292684 | 6.92E-05 |
| PA1453 | <i>flhF</i>   | 2.249812257 | 5.08E-18 |
| PA2264 | <i>PA2264</i> | 2.248388346 | 2.06E-10 |
| PA1553 | <i>ccoO1</i>  | 2.247054366 | 1.64E-24 |
| PA2987 | <i>PA2987</i> | 2.244423511 | 3.63E-15 |
| PA4557 | <i>lytB</i>   | 2.243283202 | 1.89E-17 |
| PA0508 | <i>PA0508</i> | 2.241473663 | 5.58E-15 |

|        |               |             |          |
|--------|---------------|-------------|----------|
| PA3046 | <i>PA3046</i> | 2.237332194 | 4.86E-12 |
| PA3982 | <i>PA3982</i> | 2.236699277 | 1.12E-15 |
| PA0770 | <i>rnc</i>    | 2.236269575 | 5.23E-19 |
| PA5244 | <i>PA5244</i> | 2.234832241 | 1.51E-15 |
| PA4662 | <i>murl</i>   | 2.233187868 | 4.4E-07  |
| PA4749 | <i>glmM</i>   | 2.232702824 | 7.87E-19 |
| PA0518 | <i>nirM</i>   | 2.230180148 | 7.09E-05 |
| PA1098 | <i>fleS</i>   | 2.226776176 | 4.96E-13 |
| PA2616 | <i>trxB1</i>  | 2.224027578 | 2.98E-18 |
| PA1044 | <i>PA1044</i> | 2.215448531 | 9.99E-05 |
| PA4848 | <i>accC</i>   | 2.211974826 | 1.19E-26 |
| PA4853 | <i>fis</i>    | 2.211330747 | 4.18E-10 |
| PA3799 | <i>PA3799</i> | 2.21084302  | 1.04E-19 |
| PA4719 | <i>PA4719</i> | 2.207371163 | 8.02E-13 |
| PA3770 | <i>guaB</i>   | 2.204953897 | 6.97E-30 |
| PA0723 | <i>coaB</i>   | 2.204621799 | 2.57E-13 |
| PA0331 | <i>ilvA1</i>  | 2.202689245 | 1.04E-12 |
| PA3172 | <i>PA3172</i> | 2.202508954 | 4.44E-10 |
| PA4809 | <i>fdhE</i>   | 2.202375749 | 3.5E-05  |
| PA2384 | <i>PA2384</i> | 2.19900674  | 1.33E-17 |
| PA5549 | <i>glmS</i>   | 2.19670632  | 6.64E-13 |
| PA0373 | <i>ftsY</i>   | 2.195064318 | 3.4E-15  |
| PA2613 | <i>PA2613</i> | 2.192512945 | 2.37E-11 |
| PA3999 | <i>dacC</i>   | 2.1920062   | 1.23E-22 |
| PA0773 | <i>pdxJ</i>   | 2.191131043 | 8.82E-14 |
| PA3675 | <i>PA3675</i> | 2.180074799 | 1.07E-12 |
| PA4670 | <i>prs</i>    | 2.179971722 | 1.83E-34 |
| PA3987 | <i>leuS</i>   | 2.17731791  | 5.19E-24 |
| PA4931 | <i>dnaB</i>   | 2.172416169 | 4.25E-17 |
| PA5173 | <i>arcC</i>   | 2.170481676 | 1.87E-27 |
| PA0663 | <i>PA0663</i> | 2.165334577 | 3.93E-13 |
| PA4728 | <i>folk</i>   | 2.16342194  | 2.26E-08 |
| PA4527 | <i>pilC</i>   | 2.163051639 | 5.01E-17 |
| PA1101 | <i>fliF</i>   | 2.159746183 | 9E-12    |
| PA5130 | <i>PA5130</i> | 2.159674914 | 3.72E-18 |
| PA4352 | <i>PA4352</i> | 2.158222851 | 2.38E-17 |
| PA3227 | <i>ppiA</i>   | 2.156114577 | 2.63E-10 |
| PA1563 | <i>PA1563</i> | 2.155524805 | 5.87E-05 |
| PA1518 | <i>PA1518</i> | 2.154779361 | 1.84E-09 |
| PA2730 | <i>PA2730</i> | 2.150741958 | 3.7E-12  |
| PA1099 | <i>fleR</i>   | 2.149895094 | 4.84E-11 |
| PA1584 | <i>sdhB</i>   | 2.149445994 | 2.36E-30 |
| PA0298 | <i>spuB</i>   | 2.148538253 | 5.68E-13 |

|        |               |             |          |
|--------|---------------|-------------|----------|
| PA3013 | <i>foaB</i>   | 2.148084367 | 4.1E-32  |
| PA1155 | <i>nrdB</i>   | 2.145384878 | 1.95E-24 |
| PA4430 | <i>PA4430</i> | 2.144226821 | 1.37E-22 |
| PA3811 | <i>hscB</i>   | 2.137843878 | 5.37E-19 |
| PA4410 | <i>ddlB</i>   | 2.130193994 | 2.76E-15 |
| PA1675 | <i>PA1675</i> | 2.128663332 | 0.00043  |
| PA2843 | <i>PA2843</i> | 2.126331504 | 7.63E-07 |
| PA4967 | <i>parE</i>   | 2.123855535 | 7.36E-16 |
| PA4494 | <i>roxS</i>   | 2.123024999 | 1.44E-15 |
| PA5005 | <i>PA5005</i> | 2.122846116 | 1.22E-20 |
| PA4483 | <i>gatA</i>   | 2.120127296 | 4.66E-16 |
| PA5414 | <i>PA5414</i> | 2.118457249 | 4.08E-10 |
| PA4669 | <i>ipk</i>    | 2.117938176 | 4.09E-15 |
| PA0577 | <i>dnaG</i>   | 2.116247716 | 6.02E-10 |
| PA5146 | <i>PA5146</i> | 2.112366576 | 2.24E-14 |
| PA2397 | <i>pvdE</i>   | 2.10116292  | 1.98E-14 |
| PA4487 | <i>PA4487</i> | 2.100893482 | 7.61E-06 |
| PA4572 | <i>flkB</i>   | 2.100035251 | 2.62E-22 |
| PA0579 | <i>rpsU</i>   | 2.097627344 | 1.14E-24 |
| PA1964 | <i>PA1964</i> | 2.094874634 | 1.9E-15  |
| PA3950 | <i>PA3950</i> | 2.09205362  | 1.75E-08 |
| PA0789 | <i>PA0789</i> | 2.091435822 | 0.000487 |
| PA4061 | <i>PA4061</i> | 2.091239955 | 6.78E-16 |
| PA5025 | <i>metY</i>   | 2.085037198 | 4.11E-08 |
| PA1150 | <i>pys2</i>   | 2.084701436 | 7.12E-11 |
| PA5552 | <i>glmU</i>   | 2.082430717 | 2.03E-16 |
| PA2424 | <i>pvdL</i>   | 2.081830637 | 2.25E-18 |
| PA5231 | <i>PA5231</i> | 2.080759216 | 1.35E-14 |
| PA1086 | <i>flgK</i>   | 2.078793998 | 1.66E-12 |
| PA4046 | <i>PA4046</i> | 2.075096556 | 1.58E-09 |
| PA4644 | <i>PA4644</i> | 2.069189403 | 2.21E-05 |
| PA0080 | <i>PA0080</i> | 2.068376888 | 0.00022  |
| PA1459 | <i>PA1459</i> | 2.065108686 | 2.05E-14 |
| PA0004 | <i>gyrB</i>   | 2.061199546 | 1.58E-20 |
| PA4006 | <i>nadD</i>   | 2.06116776  | 1.16E-13 |
| PA4992 | <i>PA4992</i> | 2.060634352 | 9.22E-06 |
| PA0022 | <i>PA0022</i> | 2.056100757 | 5.23E-14 |
| PA0943 | <i>PA0943</i> | 2.055714825 | 1.01E-16 |
| PA1081 | <i>flgF</i>   | 2.054826177 | 5.45E-11 |
| PA0968 | <i>PA0968</i> | 2.053945143 | 3.85E-10 |
| PA3635 | <i>eno</i>    | 2.053810213 | 3.59E-28 |
| PA2957 | <i>PA2957</i> | 2.053244213 | 2.29E-12 |
| PA2961 | <i>holB</i>   | 2.049273218 | 3.68E-07 |

|         |                |             |          |
|---------|----------------|-------------|----------|
| PA3193  | <i>glk</i>     | 2.045485049 | 0.000222 |
| PA0583  | <i>PA0583</i>  | 2.045243615 | 0.000916 |
| PA0389  | <i>PA0389</i>  | 2.045128235 | 1.1E-09  |
| PA5064  | <i>PA5064</i>  | 2.045044469 | 1.31E-07 |
| PA1075  | <i>PA1075</i>  | 2.042270579 | 3.95E-05 |
| PA2754a | <i>PA2754a</i> | 2.039290438 | 0.00036  |
| PA5040  | <i>pilQ</i>    | 2.038499519 | 9.32E-23 |
| PA2615  | <i>ftsK</i>    | 2.036909473 | 2.08E-14 |
| PA4548  | <i>PA4548</i>  | 2.03589045  | 9.61E-06 |
| PA1045  | <i>PA1045</i>  | 2.033305313 | 3.8E-06  |
| PA5443  | <i>uvrD</i>    | 2.029988558 | 1.3E-11  |
| PA5428  | <i>PA5428</i>  | 2.029911443 | 1.68E-05 |
| PA3397  | <i>fpr</i>     | 2.025198415 | 4.33E-23 |
| PA0370  | <i>PA0370</i>  | 2.023989954 | 1.06E-08 |
| PA4943  | <i>PA4943</i>  | 2.023603647 | 9.34E-21 |
| PA3167  | <i>serC</i>    | 2.021209486 | 8.96E-18 |
| PA4314  | <i>purU1</i>   | 2.02066588  | 5.11E-13 |
| PA1830  | <i>PA1830</i>  | 2.020341717 | 1.77E-21 |
| PA5046  | <i>PA5046</i>  | 2.019957126 | 5.45E-26 |
| PA4700  | <i>mrcB</i>    | 2.016803527 | 2.44E-07 |
| PA4999  | <i>waaL</i>    | 2.015446361 | 4.1E-06  |
| PA2761  | <i>PA2761</i>  | 2.015123467 | 1.66E-05 |
| PA0415  | <i>chpC</i>    | 2.009008339 | 1.14E-05 |
| PA0971  | <i>tolA</i>    | 2.003846179 | 9.81E-15 |
| PA5223  | <i>ubiH</i>    | 2.003700215 | 3.26E-13 |
| PA3979  | <i>PA3979</i>  | 2.003452424 | 5.29E-06 |
| PA4329  | <i>pykA</i>    | 2.002662432 | 1.51E-16 |
| PA5441  | <i>PA5441</i>  | 1.999567722 | 7.17E-10 |
| PA4417  | <i>murE</i>    | 1.995576044 | 1.92E-13 |
| PA4687  | <i>hitA</i>    | 1.992185804 | 2.76E-13 |
| PA2647  | <i>nuoL</i>    | 1.986874085 | 1.44E-12 |
| PA4449  | <i>hisG</i>    | 1.986764122 | 1.38E-12 |
| PA1415  | <i>PA1415</i>  | 1.985912484 | 4.12E-05 |
| PA4407  | <i>ftsZ</i>    | 1.984302213 | 8.96E-17 |
| PA2642  | <i>nuoG</i>    | 1.983673577 | 1.59E-13 |
| PA0972  | <i>tolB</i>    | 1.982623991 | 1.76E-15 |
| PA4636  | <i>PA4636</i>  | 1.981788419 | 0.000377 |
| PA3763  | <i>purL</i>    | 1.98114075  | 3.63E-14 |
| PA4957  | <i>psd</i>     | 1.980747073 | 4.17E-13 |
| PA4693  | <i>pssA</i>    | 1.977915679 | 1.92E-12 |
| PA3834  | <i>valS</i>    | 1.968439029 | 2.64E-14 |
| PA4811  | <i>fdnH</i>    | 1.966859529 | 1.19E-12 |
| PA4493  | <i>roxR</i>    | 1.96673262  | 2E-16    |



|        |               |             |          |
|--------|---------------|-------------|----------|
| PA2760 | <i>PA2760</i> | 1.964601398 | 1.78E-21 |
| PA2795 | <i>PA2795</i> | 1.963794492 | 0.000865 |
| PA2627 | <i>PA2627</i> | 1.962324349 | 1.65E-09 |
| PA1614 | <i>gpsA</i>   | 1.961593617 | 3.61E-06 |
| PA3975 | <i>thiD</i>   | 1.961260138 | 6.29E-08 |
| PA0904 | <i>lysC</i>   | 1.958219087 | 2.74E-13 |
| PA0392 | <i>PA0392</i> | 1.954749078 | 1.25E-06 |
| PA4542 | <i>clpB</i>   | 1.953144087 | 2.62E-13 |
| PA4457 | <i>PA4457</i> | 1.951637022 | 2.17E-13 |
| PA1534 | <i>recR</i>   | 1.949822279 | 8E-09    |
| PA1766 | <i>PA1766</i> | 1.949718482 | 1.37E-12 |
| PA1299 | <i>PA1299</i> | 1.943138389 | 7.48E-05 |
| PA3001 | <i>PA3001</i> | 1.943053687 | 3.74E-25 |
| PA5034 | <i>hemE</i>   | 1.94081099  | 1.32E-11 |
| PA3435 | <i>PA3435</i> | 1.938597763 | 2.56E-07 |
| PA4387 | <i>PA4387</i> | 1.938120659 | 6.82E-08 |
| PA0426 | <i>mexB</i>   | 1.93704799  | 9.76E-13 |
| PA4030 | <i>PA4030</i> | 1.928707686 | 0.000504 |
| PA3817 | <i>PA3817</i> | 1.928122399 | 2.29E-05 |
| PA1461 | <i>motD</i>   | 1.927559139 | 1.34E-05 |
| PA3803 | <i>gcpE</i>   | 1.925909962 | 9.76E-12 |
| PA0913 | <i>mgtE</i>   | 1.925788732 | 2.73E-06 |
| PA4852 | <i>PA4852</i> | 1.919928482 | 1.35E-13 |
| PA4245 | <i>rpmD</i>   | 1.913366307 | 9.16E-21 |
| PA4461 | <i>PA4461</i> | 1.90782083  | 1.54E-14 |
| PA3164 | <i>PA3164</i> | 1.900137787 | 1.3E-13  |
| PA4448 | <i>hisD</i>   | 1.89984943  | 6.68E-07 |
| PA2408 | <i>PA2408</i> | 1.895637833 | 2.25E-07 |
| PA5531 | <i>tonB1</i>  | 1.89259157  | 9.37E-06 |
| PA2629 | <i>purB</i>   | 1.892408718 | 1.43E-12 |
| PA1794 | <i>glnS</i>   | 1.886711646 | 5.87E-12 |
| PA2645 | <i>nuoJ</i>   | 1.884406032 | 9.87E-08 |
| PA4005 | <i>PA4005</i> | 1.880000877 | 6.22E-10 |
| PA0898 | <i>aruD</i>   | 1.879660476 | 2.46E-06 |
| PA5260 | <i>hemC</i>   | 1.873598442 | 1.93E-10 |
| PA5193 | <i>yrfI</i>   | 1.869967604 | 2.53E-07 |
| PA1193 | <i>PA1193</i> | 1.867397674 | 0.000128 |
| PA3640 | <i>dnaE</i>   | 1.866705148 | 8.2E-11  |
| PA0580 | <i>gcp</i>    | 1.865824178 | 5.1E-08  |
| PA0779 | <i>PA0779</i> | 1.862809639 | 3.95E-08 |
| PA0891 | <i>PA0891</i> | 1.862394704 | 3.94E-05 |
| PA3309 | <i>PA3309</i> | 1.861245494 | 3.14E-20 |
| PA3194 | <i>edd</i>    | 1.860916632 | 2.58E-09 |

|        |               |             |          |
|--------|---------------|-------------|----------|
| PA2641 | <i>nuoF</i>   | 1.858294567 | 3.31E-09 |
| PA2377 | <i>PA2377</i> | 1.858228384 | 0.000118 |
| PA5494 | <i>PA5494</i> | 1.853153817 | 4.51E-10 |
| PA3647 | <i>PA3647</i> | 1.851658435 | 2.66E-12 |
| PA1796 | <i>folD</i>   | 1.851462214 | 8.71E-09 |
| PA0374 | <i>ftsE</i>   | 1.851233145 | 8.6E-10  |
| PA3804 | <i>PA3804</i> | 1.848460732 | 2.4E-08  |
| PA0375 | <i>ftsX</i>   | 1.848343758 | 2.87E-08 |
| PA2436 | <i>PA2436</i> | 1.846424692 | 0.000323 |
| PA0541 | <i>PA0541</i> | 1.845847905 | 2.59E-09 |
| PA4695 | <i>ilvH</i>   | 1.844692321 | 1.06E-08 |
| PA4412 | <i>murG</i>   | 1.8419205   | 1.57E-05 |
| PA4275 | <i>nusG</i>   | 1.841185233 | 1.27E-14 |
| PA4960 | <i>PA4960</i> | 1.84070831  | 2.13E-09 |
| PA4656 | <i>PA4656</i> | 1.839577614 | 4.84E-05 |
| PA5036 | <i>gltB</i>   | 1.835917744 | 5.98E-09 |
| PA1080 | <i>flgE</i>   | 1.833979477 | 3.06E-09 |
| PA2412 | <i>PA2412</i> | 1.832982138 | 7.21E-17 |
| PA4481 | <i>mreB</i>   | 1.832123082 | 1.09E-10 |
| PA3563 | <i>fruR</i>   | 1.831487645 | 0.000171 |
| PA0431 | <i>PA0431</i> | 1.829893679 | 1.01E-09 |
| PA4414 | <i>murD</i>   | 1.829460369 | 1.96E-09 |
| PA3117 | <i>asd</i>    | 1.828801895 | 5.12E-09 |
| PA3453 | <i>PA3453</i> | 1.821149185 | 5.07E-06 |
| PA4460 | <i>PA4460</i> | 1.819902324 | 4.33E-11 |
| PA4810 | <i>fdnI</i>   | 1.81884039  | 1.04E-05 |
| PA2290 | <i>gcd</i>    | 1.815778434 | 1.97E-09 |
| PA2323 | <i>PA2323</i> | 1.814058542 | 6.86E-08 |
| PA1480 | <i>ccmF</i>   | 1.814007519 | 3.95E-07 |
| PA2851 | <i>efp</i>    | 1.811969793 | 4.06E-13 |
| PA0658 | <i>PA0658</i> | 1.810250557 | 0.000111 |
| PA5042 | <i>pilO</i>   | 1.809460754 | 1.95E-08 |
| PA5274 | <i>rnk</i>    | 1.809271797 | 4.18E-10 |
| PA5065 | <i>ubiB</i>   | 1.807995131 | 0.000143 |
| PA4741 | <i>rpsO</i>   | 1.807673784 | 2.47E-15 |
| PA1116 | <i>PA1116</i> | 1.80695187  | 3.3E-07  |
| PA2983 | <i>PA2983</i> | 1.801119524 | 9.08E-08 |
| PA1583 | <i>sdhA</i>   | 1.801042035 | 2.71E-14 |
| PA5334 | <i>rph</i>    | 1.800953412 | 7.77E-09 |
| PA3158 | <i>wbpB</i>   | 1.798286513 | 1.7E-11  |
| PA0896 | <i>aruF</i>   | 1.7969827   | 8.21E-08 |
| PA1767 | <i>PA1767</i> | 1.795911424 | 4.85E-09 |
| PA4997 | <i>msbA</i>   | 1.794668695 | 2.13E-08 |

|         |                |             |          |
|---------|----------------|-------------|----------|
| PA3173  | <i>PA3173</i>  | 1.793649684 | 3.47E-07 |
| PA3154  | <i>wzy</i>     | 1.793626151 | 0.000152 |
| PA5041  | <i>pilP</i>    | 1.789777958 | 1.07E-08 |
| PA0705  | <i>migA</i>    | 1.784594812 | 4.43E-08 |
| PA3483  | <i>PA3483</i>  | 1.784081126 | 6.49E-05 |
| PA4729  | <i>panB</i>    | 1.78106027  | 0.000701 |
| PA3413  | <i>PA3413</i>  | 1.780068036 | 0.000555 |
| PA5345  | <i>recG</i>    | 1.779966718 | 0.000977 |
| PA3626  | <i>PA3626</i>  | 1.778877421 | 9.68E-06 |
| PA4647  | <i>uraA</i>    | 1.778015658 | 1.44E-05 |
| PA4491  | <i>PA4491</i>  | 1.776717492 | 0.000278 |
| PA0668  | <i>tyrZ</i>    | 1.770816834 | 1.26E-09 |
| PA0354  | <i>PA0354</i>  | 1.764959325 | 1.54E-07 |
| PA4756  | <i>carB</i>    | 1.762353611 | 1.34E-09 |
| PA3997  | <i>lipB</i>    | 1.761510886 | 6.18E-07 |
| PA1162  | <i>dapE</i>    | 1.759635896 | 8.26E-07 |
| PA4727  | <i>pcnB</i>    | 1.758373995 | 1.61E-08 |
| PA3440a | <i>PA3440a</i> | 1.754727524 | 0.000394 |
| PA5221  | <i>PA5221</i>  | 1.752703846 | 0.000374 |
| PA4964  | <i>parC</i>    | 1.75249571  | 1.96E-07 |
| PA0609  | <i>trpE</i>    | 1.750763252 | 6.36E-07 |
| PA3645  | <i>fabZ</i>    | 1.749643381 | 1.12E-08 |
| PA2409  | <i>PA2409</i>  | 1.74314233  | 1.43E-06 |
| PA4031  | <i>ppa</i>     | 1.742929212 | 2.52E-13 |
| PA4459  | <i>PA4459</i>  | 1.739907322 | 7.09E-07 |
| PA2407  | <i>PA2407</i>  | 1.739869056 | 6.22E-07 |
| PA1083  | <i>flgH</i>    | 1.734846906 | 4.48E-05 |
| PA0576  | <i>rpoD</i>    | 1.733868972 | 7.39E-15 |
| PA2979  | <i>kdsB</i>    | 1.727602113 | 0.000454 |
| PA1102  | <i>fliG</i>    | 1.725254978 | 4.72E-07 |
| PA5215  | <i>gcvT1</i>   | 1.724452399 | 5.49E-07 |
| PA4317  | <i>PA4317</i>  | 1.723331014 | 2.28E-06 |
| PA5110  | <i>fbp</i>     | 1.722347718 | 2.16E-10 |
| PA4001  | <i>sltB1</i>   | 1.720623884 | 2.66E-05 |
| PA0872  | <i>phhA</i>    | 1.715911591 | 5.85E-07 |
| PA5019  | <i>PA5019</i>  | 1.714016794 | 2.85E-05 |
| PA4602  | <i>glyA3</i>   | 1.707825297 | 3.79E-10 |
| PA2999  | <i>nqrA</i>    | 1.707134182 | 1.8E-06  |
| PA2732  | <i>PA2732</i>  | 1.704701321 | 0.000128 |
| PA3181  | <i>PA3181</i>  | 1.704067118 | 0.000709 |
| PA0449  | <i>PA0449</i>  | 1.703485604 | 6.94E-07 |
| PA0651  | <i>trpC</i>    | 1.703372167 | 3.6E-06  |
| PA4418  | <i>ftsI</i>    | 1.699965409 | 5.51E-06 |

|        |               |             |          |
|--------|---------------|-------------|----------|
| PA3827 | <i>PA3827</i> | 1.697800043 | 1.13E-05 |
| PA5000 | <i>wapR</i>   | 1.694200724 | 2.89E-06 |
| PA3107 | <i>metZ</i>   | 1.692270667 | 5.62E-06 |
| PA3262 | <i>PA3262</i> | 1.690849816 | 8.25E-12 |
| PA2649 | <i>nuoN</i>   | 1.690199968 | 4.72E-05 |
| PA1457 | <i>cheZ</i>   | 1.688452385 | 2.85E-07 |
| PA2614 | <i>lolA</i>   | 1.687182256 | 7.86E-07 |
| PA5142 | <i>hisH1</i>  | 1.684877927 | 8.38E-06 |
| PA4850 | <i>prmA</i>   | 1.683014195 | 0.000192 |
| PA0337 | <i>ptsP</i>   | 1.683009371 | 1.59E-06 |
| PA5331 | <i>pyrE</i>   | 1.679588835 | 0.000154 |
| PA3263 | <i>PA3263</i> | 1.676248359 | 1.47E-06 |
| PA4333 | <i>PA4333</i> | 1.667091362 | 5.17E-07 |
| PA1532 | <i>dnaX</i>   | 1.662535755 | 5.62E-06 |
| PA0432 | <i>sahH</i>   | 1.659087295 | 2.14E-11 |
| PA4952 | <i>PA4952</i> | 1.657179164 | 6.53E-05 |
| PA1554 | <i>ccoN1</i>  | 1.657148942 | 5.38E-10 |
| PA3988 | <i>PA3988</i> | 1.644133582 | 1.18E-06 |
| PA0758 | <i>PA0758</i> | 1.641106019 | 4.07E-05 |
| PA5291 | <i>PA5291</i> | 1.638057634 | 0.000225 |
| PA4544 | <i>rluD</i>   | 1.634666584 | 0.000188 |
| PA1082 | <i>flgG</i>   | 1.626458297 | 0.000233 |
| PA0778 | <i>icp</i>    | 1.624584424 | 0.000805 |
| PA1049 | <i>pdxH</i>   | 1.621433399 | 6.1E-06  |
| PA5563 | <i>soj</i>    | 1.61395533  | 0.000335 |
| PA3285 | <i>PA3285</i> | 1.604837285 | 0.000942 |
| PA0660 | <i>PA0660</i> | 1.603839262 | 5.66E-05 |
| PA5322 | <i>algC</i>   | 1.597642438 | 0.00013  |
| PA5172 | <i>arcB</i>   | 1.597022342 | 3.59E-09 |
| PA4416 | <i>murF</i>   | 1.592914012 | 0.000191 |
| PA1793 | <i>ppiB</i>   | 1.588114166 | 3.49E-06 |
| PA4409 | <i>ftsQ</i>   | 1.580421018 | 0.000705 |
| PA3940 | <i>PA3940</i> | 1.577879288 | 3.64E-06 |
| PA4450 | <i>murA</i>   | 1.573529751 | 4.16E-07 |
| PA2743 | <i>infC</i>   | 1.571783637 | 2.4E-11  |
| PA0956 | <i>proS</i>   | 1.56623625  | 5.55E-06 |
| PA1580 | <i>gltA</i>   | 1.562335281 | 5.76E-05 |
| PA0903 | <i>alaS</i>   | 1.561694568 | 0.000271 |
| PA1787 | <i>acnB</i>   | 1.560091021 | 3.79E-07 |
| PA0009 | <i>glyQ</i>   | 1.559707413 | 0.000155 |
| PA3155 | <i>wbpE</i>   | 1.557322881 | 0.000392 |
| PA3168 | <i>gyrA</i>   | 1.55556815  | 1.12E-05 |
| PA1551 | <i>PA1551</i> | 1.554695671 | 0.000422 |

|        |               |             |          |
|--------|---------------|-------------|----------|
| PA2626 | <i>trmU</i>   | 1.541603395 | 0.000919 |
| PA0425 | <i>mexA</i>   | 1.539776548 | 0.00025  |
| PA4938 | <i>purA</i>   | 1.534006469 | 4.15E-07 |
| PA4406 | <i>lpxC</i>   | 1.527892611 | 3.26E-05 |
| PA0002 | <i>dnaN</i>   | 1.503995573 | 3.3E-05  |
| PA0958 | <i>oprD</i>   | 1.477949531 | 0.000152 |
| PA4941 | <i>hflC</i>   | 1.445458017 | 0.00016  |
| PA1777 | <i>oprF</i>   | -1.26702446 | 3.16E-06 |
| PA4764 | <i>fur</i>    | -1.33559422 | 2.74E-05 |
| PA1801 | <i>clpP</i>   | -1.37125279 | 6.36E-08 |
| PA2854 | <i>PA2854</i> | -1.37442003 | 1.87E-05 |
| PA4525 | <i>pilA</i>   | -1.39486324 | 1.77E-08 |
| PA0769 | <i>PA0769</i> | -1.41094659 | 0.000561 |
| PA0547 | <i>PA0547</i> | -1.41102286 | 4.89E-05 |
| PA2023 | <i>galU</i>   | -1.4132511  | 8.22E-08 |
| PA1609 | <i>fabB</i>   | -1.41513247 | 6.3E-07  |
| PA4944 | <i>hfq</i>    | -1.41527849 | 4.38E-07 |
| PA1681 | <i>aroC</i>   | -1.41530603 | 0.000389 |
| PA5018 | <i>msrA</i>   | -1.41857425 | 4.12E-05 |
| PA5013 | <i>ilvE</i>   | -1.4204145  | 2.2E-09  |
| PA5489 | <i>dsbA</i>   | -1.42395223 | 1.03E-08 |
| PA0838 | <i>PA0838</i> | -1.42950248 | 0.00089  |
| PA1821 | <i>PA1821</i> | -1.43415074 | 5.47E-05 |
| PA5371 | <i>PA5371</i> | -1.4459322  | 0.000261 |
| PA3257 | <i>prc</i>    | -1.44613299 | 9.54E-07 |
| PA0653 | <i>PA0653</i> | -1.45065772 | 1.83E-05 |
| PA0068 | <i>PA0068</i> | -1.45123163 | 0.000299 |
| PA1754 | <i>cysB</i>   | -1.45182478 | 7.8E-07  |
| PA5474 | <i>PA5474</i> | -1.46720222 | 0.000145 |
| PA4971 | <i>aspP</i>   | -1.48480492 | 8.14E-05 |
| PA5174 | <i>PA5174</i> | -1.48536685 | 3.87E-06 |
| PA5067 | <i>hisE</i>   | -1.49203374 | 2.6E-06  |
| PA4492 | <i>PA4492</i> | -1.49998147 | 3.7E-06  |
| PA5107 | <i>blc</i>    | -1.50327449 | 2.7E-05  |
| PA0300 | <i>spuD</i>   | -1.50861222 | 7.52E-08 |
| PA2531 | <i>PA2531</i> | -1.51140622 | 7.8E-07  |
| PA3199 | <i>PA3199</i> | -1.51837314 | 1.09E-05 |
| PA0265 | <i>gabD</i>   | -1.51884913 | 1.48E-07 |
| PA5125 | <i>ntrC</i>   | -1.52112525 | 0.000567 |
| PA5233 | <i>PA5233</i> | -1.5280418  | 0.000513 |
| PA5289 | <i>PA5289</i> | -1.53108241 | 0.00016  |
| PA5167 | <i>PA5167</i> | -1.53318096 | 8.67E-05 |
| PA4851 | <i>PA4851</i> | -1.53459567 | 2.86E-06 |

|         |                |             |          |
|---------|----------------|-------------|----------|
| PA0314  | <i>PA0314</i>  | -1.53570589 | 4.71E-07 |
| PA1305  | <i>PA1305</i>  | -1.54224446 | 4.33E-07 |
| PA3195  | <i>gapA</i>    | -1.55065314 | 3.93E-06 |
| PA0962  | <i>PA0962</i>  | -1.55934108 | 0        |
| PA0103a | <i>PA0103a</i> | -1.5663492  | 0.000437 |
| PA1752  | <i>PA1752</i>  | -1.56863625 | 9.09E-06 |
| PA0763  | <i>mucA</i>    | -1.57712286 | 0        |
| PA0849  | <i>trxB2</i>   | -1.57793909 | 7.82E-08 |
| PA2025  | <i>gor</i>     | -1.58109341 | 5E-09    |
| PA2637  | <i>nuoA</i>    | -1.58192499 | 1.14E-08 |
| PA3256  | <i>PA3256</i>  | -1.58592524 | 6.6E-05  |
| PA4519  | <i>speC</i>    | -1.59180114 | 4.3E-09  |
| PA4135  | <i>PA4135</i>  | -1.60187458 | 0.000249 |
| PA3754  | <i>PA3754</i>  | -1.60265076 | 2.82E-05 |
| PA3017  | <i>PA3017</i>  | -1.60383077 | 2.48E-09 |
| PA4455  | <i>PA4455</i>  | -1.60389178 | 9.21E-10 |
| PA0837  | <i>slyD</i>    | -1.60460855 | 0        |
| PA4079  | <i>PA4079</i>  | -1.6106318  | 2.56E-08 |
| PA2444  | <i>glyA2</i>   | -1.61128701 | 4.18E-08 |
| PA4722  | <i>PA4722</i>  | -1.61139144 | 3.35E-06 |
| PA0006  | <i>PA0006</i>  | -1.61536661 | 4.65E-05 |
| PA4534  | <i>PA4534</i>  | -1.61929969 | 1.27E-06 |
| PA0429  | <i>PA0429</i>  | -1.6206213  | 3.65E-12 |
| PA5200  | <i>amgR</i>    | -1.62066058 | 4.97E-11 |
| PA1829  | <i>PA1829</i>  | -1.62532453 | 0.000436 |
| PA2707  | <i>PA2707</i>  | -1.626381   | 2.91E-08 |
| PA4315  | <i>mvaT</i>    | -1.6325726  | 2.03E-08 |
| PA3531  | <i>bfrB</i>    | -1.63380746 | 0        |
| PA1775  | <i>cmpX</i>    | -1.63393146 | 4.45E-09 |
| PA1769  | <i>PA1769</i>  | -1.63505142 | 3.87E-09 |
| PA0667  | <i>PA0667</i>  | -1.64622719 | 1.34E-10 |
| PA4537  | <i>PA4537</i>  | -1.65554339 | 6.24E-06 |
| PA0655  | <i>PA0655</i>  | -1.65580741 | 6.05E-15 |
| PA4922  | <i>azu</i>     | -1.65587858 | 0        |
| PA2427  | <i>PA2427</i>  | -1.65799715 | 1.07E-13 |
| PA2666  | <i>PA2666</i>  | -1.65905681 | 0.000447 |
| PA5305  | <i>PA5305</i>  | -1.66223194 | 1.44E-08 |
| PA4556  | <i>pilE</i>    | -1.66597618 | 3.66E-09 |
| PA1249  | <i>aprA</i>    | -1.66872773 | 7.68E-11 |
| PA0060  | <i>PA0060</i>  | -1.6715343  | 0.000674 |
| PA5176  | <i>PA5176</i>  | -1.67396184 | 2.84E-10 |
| PA5435  | <i>PA5435</i>  | -1.68368298 | 4.83E-08 |
| PA2709  | <i>cysK</i>    | -1.6839406  | 1.86E-11 |

|        |               |             |          |
|--------|---------------|-------------|----------|
| PA5447 | <i>wbpZ</i>   | -1.69088223 | 4.03E-05 |
| PA4657 | <i>PA4657</i> | -1.69100168 | 7.38E-10 |
| PA5358 | <i>ubiA</i>   | -1.69364056 | 7.8E-11  |
| PA2802 | <i>PA2802</i> | -1.69600985 | 9.62E-08 |
| PA5068 | <i>tatA</i>   | -1.69972869 | 8.73E-11 |
| PA0376 | <i>rpoH</i>   | -1.70151624 | 0        |
| PA3266 | <i>capB</i>   | -1.70890372 | 0        |
| PA3784 | <i>PA3784</i> | -1.70952276 | 1.46E-11 |
| PA2754 | <i>PA2754</i> | -1.71114631 | 5.29E-13 |
| PA2860 | <i>PA2860</i> | -1.7115361  | 4.15E-07 |
| PA3201 | <i>PA3201</i> | -1.7260436  | 2.82E-09 |
| PA4523 | <i>PA4523</i> | -1.72877198 | 1.05E-13 |
| PA5347 | <i>PA5347</i> | -1.73811043 | 7.86E-08 |
| PA3697 | <i>PA3697</i> | -1.73897786 | 7.03E-09 |
| PA3170 | <i>PA3170</i> | -1.74335471 | 1.19E-11 |
| PA4180 | <i>PA4180</i> | -1.74349676 | 1.63E-11 |
| PA4798 | <i>PA4798</i> | -1.74352259 | 5.9E-05  |
| PA1029 | <i>PA1029</i> | -1.74437271 | 0.000179 |
| PA1933 | <i>PA1933</i> | -1.74535882 | 6.86E-10 |
| PA4787 | <i>PA4787</i> | -1.75422607 | 1.41E-08 |
| PA1812 | <i>mltD</i>   | -1.76067353 | 4.18E-13 |
| PA5162 | <i>rmID</i>   | -1.76540688 | 2.75E-11 |
| PA0158 | <i>PA0158</i> | -1.77831067 | 6.38E-05 |
| PA5363 | <i>PA5363</i> | -1.78042743 | 1.68E-12 |
| PA4511 | <i>PA4511</i> | -1.78441557 | 0.000302 |
| PA5436 | <i>PA5436</i> | -1.78594194 | 2.44E-09 |
| PA4970 | <i>PA4970</i> | -1.78686928 | 1.1E-11  |
| PA4401 | <i>PA4401</i> | -1.78761399 | 3.22E-07 |
| PA3122 | <i>PA3122</i> | -1.79121732 | 0.000696 |
| PA0071 | <i>PA0071</i> | -1.79759493 | 1.67E-10 |
| PA2403 | <i>PA2403</i> | -1.79777218 | 2.05E-12 |
| PA5198 | <i>PA5198</i> | -1.79848494 | 1.65E-08 |
| PA4434 | <i>PA4434</i> | -1.79892501 | 1.66E-09 |
| PA2582 | <i>PA2582</i> | -1.8053896  | 0        |
| PA3533 | <i>PA3533</i> | -1.80582523 | 0        |
| PA0661 | <i>PA0661</i> | -1.8132247  | 1.72E-10 |
| PA1679 | <i>PA1679</i> | -1.81741018 | 4.24E-15 |
| PA3972 | <i>PA3972</i> | -1.81816424 | 0.000228 |
| PA1579 | <i>PA1579</i> | -1.82277211 | 7.63E-20 |
| PA2318 | <i>PA2318</i> | -1.83076451 | 6.77E-05 |
| PA1838 | <i>cysI</i>   | -1.83087362 | 1.9E-12  |
| PA0167 | <i>PA0167</i> | -1.8323862  | 6.57E-08 |
| PA4701 | <i>PA4701</i> | -1.83457764 | 6.74E-14 |

|        |               |             |          |
|--------|---------------|-------------|----------|
| PA2856 | <i>tesA</i>   | -1.83523161 | 2.11E-06 |
| PA5150 | <i>PA5150</i> | -1.85122925 | 4.52E-17 |
| PA2009 | <i>hmgA</i>   | -1.85141647 | 1.17E-08 |
| PA4236 | <i>katA</i>   | -1.85458092 | 0        |
| PA0312 | <i>PA0312</i> | -1.8561705  | 2.86E-13 |
| PA3584 | <i>glpD</i>   | -1.85848772 | 0        |
| PA1741 | <i>PA1741</i> | -1.86704779 | 1.16E-11 |
| PA1813 | <i>PA1813</i> | -1.86906729 | 3.04E-10 |
| PA5206 | <i>argE</i>   | -1.87407381 | 1.42E-11 |
| PA2824 | <i>PA2824</i> | -1.87480883 | 3.85E-05 |
| PA1096 | <i>PA1096</i> | -1.87655665 | 0        |
| PA3052 | <i>PA3052</i> | -1.87737845 | 1.1E-10  |
| PA1203 | <i>PA1203</i> | -1.88003052 | 0.000842 |
| PA3349 | <i>PA3349</i> | -1.88383126 | 0        |
| PA5165 | <i>PA5165</i> | -1.8838556  | 0.000102 |
| PA4951 | <i>orn</i>    | -1.8860684  | 2.17E-15 |
| PA1756 | <i>cysH</i>   | -1.89190447 | 1.71E-08 |
| PA3437 | <i>folM</i>   | -1.89499655 | 6.28E-07 |
| PA4521 | <i>PA4521</i> | -1.9033609  | 9.36E-07 |
| PA0715 | <i>PA0715</i> | -1.9033807  | 1.74E-09 |
| PA1946 | <i>rbsB</i>   | -1.90639429 | 1.74E-06 |
| PA2797 | <i>PA2797</i> | -1.90657646 | 6.4E-17  |
| PA0745 | <i>PA0745</i> | -1.91028637 | 1.58E-08 |
| PA3043 | <i>PA3043</i> | -1.91044266 | 2.57E-10 |
| PA2443 | <i>sdaA</i>   | -1.9131974  | 5.94E-16 |
| PA4175 | <i>piv</i>    | -1.91392065 | 8.96E-21 |
| PA1065 | <i>PA1065</i> | -1.91561704 | 7.57E-05 |
| PA1005 | <i>PA1005</i> | -1.91714157 | 1.4E-15  |
| PA0053 | <i>PA0053</i> | -1.91771465 | 2.14E-11 |
| PA3582 | <i>glpK</i>   | -1.92893925 | 6.29E-23 |
| PA2896 | <i>PA2896</i> | -1.93144825 | 5.41E-05 |
| PA0706 | <i>cat</i>    | -1.93762415 | 1.89E-09 |
| PA3345 | <i>PA3345</i> | -1.93845988 | 0.000321 |
| PA5267 | <i>hcpB</i>   | -1.95808254 | 4.78E-08 |
| PA0565 | <i>PA0565</i> | -1.96328821 | 2.93E-09 |
| PA2685 | <i>PA2685</i> | -1.9638614  | 1.32E-08 |
| PA2960 | <i>pilZ</i>   | -1.96834104 | 1.95E-13 |
| PA3815 | <i>iscR</i>   | -1.97206175 | 2.9E-21  |
| PA3022 | <i>PA3022</i> | -1.97620706 | 4.31E-16 |
| PA2586 | <i>gacA</i>   | -1.97923268 | 9.47E-22 |
| PA1306 | <i>PA1306</i> | -1.97987761 | 7.12E-14 |
| PA2756 | <i>PA2756</i> | -1.98150209 | 3.98E-15 |
| PA2718 | <i>PA2718</i> | -1.98300067 | 9.93E-06 |



|         |                |             |          |
|---------|----------------|-------------|----------|
| PA5313  | <i>PA5313</i>  | -1.98648437 | 2.52E-12 |
| PA1610  | <i>fabA</i>    | -1.98666039 | 8.18E-22 |
| PA5240  | <i>trxA</i>    | -1.99399004 | 0        |
| PA1474  | <i>PA1474</i>  | -1.99846993 | 2.44E-15 |
| PA3053  | <i>PA3053</i>  | -2.0017382  | 3E-05    |
| PA1039  | <i>PA1039</i>  | -2.00300356 | 0.000181 |
| PA3229  | <i>PA3229</i>  | -2.00369995 | 0.000207 |
| PA0157  | <i>PA0157</i>  | -2.00391002 | 0.000128 |
| PA5450  | <i>wzt</i>     | -2.00516555 | 2.64E-06 |
| PA4604  | <i>PA4604</i>  | -2.00519779 | 6.57E-08 |
| PA1247  | <i>aprE</i>    | -2.0076475  | 1.34E-07 |
| PA5288  | <i>glnK</i>    | -2.01307147 | 0        |
| PA1034  | <i>PA1034</i>  | -2.02006374 | 3.11E-05 |
| PA3010  | <i>PA3010</i>  | -2.03122201 | 3.77E-21 |
| PA2231  | <i>pslA</i>    | -2.03157768 | 6.74E-12 |
| PA1246  | <i>aprD</i>    | -2.03465552 | 9.06E-11 |
| PA1199  | <i>PA1199</i>  | -2.04100309 | 2.41E-21 |
| PA1366  | <i>PA1366</i>  | -2.04300581 | 1.82E-11 |
| PA3399  | <i>PA3399</i>  | -2.04753406 | 5.39E-06 |
| PA5111  | <i>gloA3</i>   | -2.0498315  | 4.02E-12 |
| PA4611  | <i>PA4611</i>  | -2.05015144 | 0        |
| PA2008  | <i>fahA</i>    | -2.0516979  | 1.4E-09  |
| PA0500  | <i>bioB</i>    | -2.05200588 | 2.46E-15 |
| PA4954  | <i>motA</i>    | -2.05667773 | 1.11E-22 |
| PA4026  | <i>PA4026</i>  | -2.06580076 | 1.99E-15 |
| PA1478  | <i>PA1478</i>  | -2.06686506 | 1.19E-06 |
| PA5119  | <i>glnA</i>    | -2.07039406 | 0        |
| PA1248  | <i>aprF</i>    | -2.07869326 | 6.15E-05 |
| PA4419  | <i>ftsL</i>    | -2.07915478 | 6.05E-09 |
| PA1129  | <i>PA1129</i>  | -2.08232067 | 5.25E-07 |
| PA0195  | <i>pntAA</i>   | -2.08689856 | 6E-11    |
| PA2606  | <i>PA2606</i>  | -2.08928722 | 9.68E-14 |
| PA2559a | <i>PA2559a</i> | -2.09310152 | 0.000258 |
| PA3313  | <i>PA3313</i>  | -2.09457196 | 5.5E-21  |
| PA0862  | <i>PA0862</i>  | -2.09606509 | 3.94E-20 |
| PA4940  | <i>PA4940</i>  | -2.09842701 | 4.31E-13 |
| PA2805  | <i>PA2805</i>  | -2.10035205 | 0        |
| PA0055  | <i>PA0055</i>  | -2.10779797 | 4.9E-17  |
| PA5091  | <i>hutG</i>    | -2.10966281 | 0.000206 |
| PA2045  | <i>PA2045</i>  | -2.10989145 | 6.15E-13 |
| PA0338  | <i>PA0338</i>  | -2.11602041 | 3.24E-05 |
| PA4451  | <i>PA4451</i>  | -2.12073652 | 1.85E-20 |
| PA0385  | <i>PA0385</i>  | -2.1226252  | 1.81E-05 |

|          |                 |             |          |
|----------|-----------------|-------------|----------|
| PA4614   | <i>mscL</i>     | -2.13267538 | 0        |
| PA1432   | <i>lasI</i>     | -2.13447399 | 5.54E-24 |
| PA2609   | <i>PA2609</i>   | -2.13488673 | 1.42E-15 |
| PA1331   | <i>PA1331</i>   | -2.13495105 | 0.000208 |
| PA5423   | <i>PA5423</i>   | -2.13500497 | 9.78E-16 |
| PA0820   | <i>PA0820</i>   | -2.137419   | 2.52E-10 |
| PA0821   | <i>PA0821</i>   | -2.13786853 | 1.88E-06 |
| PA1244   | <i>PA1244</i>   | -2.13861361 | 1.3E-24  |
| PA4291   | <i>PA4291</i>   | -2.13933455 | 8.21E-23 |
| PA1998   | <i>dhcR</i>     | -2.14050561 | 0.000345 |
| PA1245   | <i>PA1245</i>   | -2.14309228 | 6.37E-28 |
| PA0148   | <i>PA0148</i>   | -2.15113746 | 2.62E-15 |
| PA0603   | <i>PA0603</i>   | -2.15412428 | 1.45E-09 |
| PA2942.1 | <i>PA2942.1</i> | -2.16198261 | 1.09E-17 |
| PA2049   | <i>PA2049</i>   | -2.1626731  | 1.41E-10 |
| PA1066   | <i>PA1066</i>   | -2.16364389 | 4.44E-06 |
| PA3340   | <i>PA3340</i>   | -2.16838833 | 1.34E-06 |
| PA3898   | <i>PA3898</i>   | -2.18577737 | 5.78E-07 |
| PA2062   | <i>PA2062</i>   | -2.18667506 | 2.19E-06 |
| PA4697   | <i>PA4697</i>   | -2.19088664 | 1.92E-18 |
| PA1463   | <i>PA1463</i>   | -2.19239654 | 6.54E-25 |
| PA1134   | <i>PA1134</i>   | -2.21522627 | 6.98E-07 |
| PA0953   | <i>PA0953</i>   | -2.21627129 | 1.16E-12 |
| PA5017   | <i>PA5017</i>   | -2.21995057 | 4.63E-24 |
| PA1040   | <i>PA1040</i>   | -2.22196559 | 1.73E-07 |
| PA4735   | <i>PA4735</i>   | -2.22229318 | 4.72E-25 |
| PA3306   | <i>PA3306</i>   | -2.23099948 | 1.59E-10 |
| PA3733   | <i>PA3733</i>   | -2.2314525  | 4.02E-12 |
| PA2568   | <i>PA2568</i>   | -2.23735166 | 1.17E-12 |
| PA3739   | <i>PA3739</i>   | -2.23823836 | 1.14E-05 |
| PA3338   | <i>PA3338</i>   | -2.23945211 | 1.68E-07 |
| PA3475   | <i>pheC</i>     | -2.24126888 | 6.78E-11 |
| PA2195   | <i>hcnC</i>     | -2.24150248 | 3.73E-08 |
| PA3856   | <i>PA3856</i>   | -2.24206414 | 3.24E-14 |
| PA3455   | <i>PA3455</i>   | -2.24428939 | 8.26E-26 |
| PA5161   | <i>rmIB</i>     | -2.25076697 | 1.47E-38 |
| PA0792   | <i>prpD</i>     | -2.25660177 | 2.83E-11 |
| PA0446   | <i>PA0446</i>   | -2.25838791 | 6.34E-12 |
| PA4466   | <i>PA4466</i>   | -2.26046909 | 3.52E-14 |
| PA5356   | <i>glcC</i>     | -2.26314791 | 0.000121 |
| PA3576   | <i>PA3576</i>   | -2.26687751 | 1.85E-08 |
| PA4463   | <i>PA4463</i>   | -2.26841869 | 0        |
| PA4111   | <i>PA4111</i>   | -2.27014766 | 3.22E-11 |

|          |                |             |          |
|----------|----------------|-------------|----------|
| PA4027   | <i>PA4027</i>  | -2.27482042 | 1.11E-05 |
| PA2841   | <i>PA2841</i>  | -2.28178393 | 2.24E-08 |
| PA0397   | <i>PA0397</i>  | -2.28390132 | 3.5E-08  |
| PA1376   | <i>aceK</i>    | -2.28496198 | 2.22E-12 |
| PA4421.1 | <i>rnpB</i>    | -2.2851161  | 0        |
| PA1269   | <i>PA1269</i>  | -2.29670558 | 2.08E-12 |
| PA4181   | <i>PA4181</i>  | -2.29793784 | 1.53E-05 |
| PA3330   | <i>PA3330</i>  | -2.30235485 | 0.000232 |
| PA2857   | <i>PA2857</i>  | -2.30411361 | 1.06E-06 |
| PA3785   | <i>PA3785</i>  | -2.30961351 | 1.78E-18 |
| PA5446   | <i>PA5446</i>  | -2.31400588 | 0        |
| PA3615   | <i>PA3615</i>  | -2.3147084  | 6.82E-30 |
| PA1760   | <i>PA1760</i>  | -2.32783508 | 6.86E-07 |
| PA1469   | <i>PA1469</i>  | -2.33001052 | 4.01E-05 |
| PA1092   | <i>fliC</i>    | -2.34669116 | 0        |
| PA4116   | <i>bphO</i>    | -2.34888056 | 1.58E-11 |
| PA1544   | <i>anr</i>     | -2.3498956  | 0        |
| PA3412   | <i>PA3412</i>  | -2.35079672 | 0.000384 |
| PA5153   | <i>PA5153</i>  | -2.35527624 | 2.24E-25 |
| PA2620   | <i>clpA</i>    | -2.37599988 | 0        |
| PA2747a  | <i>PA2747a</i> | -2.38193111 | 1.2E-05  |
| PA3857   | <i>pcs</i>     | -2.39078965 | 2.62E-23 |
| PA2007   | <i>maiA</i>    | -2.39182421 | 3.01E-20 |
| PA5522   | <i>PA5522</i>  | -2.39394441 | 5.49E-06 |
| PA4391   | <i>PA4391</i>  | -2.39399859 | 4.71E-06 |
| PA3190   | <i>PA3190</i>  | -2.39418406 | 3.31E-25 |
| PA1123   | <i>PA1123</i>  | -2.39906819 | 1.72E-18 |
| PA2827   | <i>PA2827</i>  | -2.40060413 | 4.75E-29 |
| PA3602   | <i>PA3602</i>  | -2.40397048 | 3.53E-27 |
| PA3819   | <i>PA3819</i>  | -2.40577874 | 8.97E-38 |
| PA3786   | <i>PA3786</i>  | -2.4139915  | 1.83E-21 |
| PA4535   | <i>PA4535</i>  | -2.42779974 | 5.48E-20 |
| PA4713   | <i>PA4713</i>  | -2.43424437 | 0.000113 |
| PA3239   | <i>PA3239</i>  | -2.43544318 | 3.58E-22 |
| PA1473   | <i>PA1473</i>  | -2.43950426 | 8.76E-07 |
| PA0954   | <i>PA0954</i>  | -2.44158027 | 1.79E-19 |
| PA4017   | <i>PA4017</i>  | -2.44381485 | 3.53E-30 |
| PA3796   | <i>PA3796</i>  | -2.44396926 | 1.87E-12 |
| PA2749   | <i>endA</i>    | -2.44690262 | 5.63E-09 |
| PA1325   | <i>PA1325</i>  | -2.45612263 | 8.93E-06 |
| PA3681   | <i>PA3681</i>  | -2.4581377  | 2.49E-05 |
| PA2781   | <i>PA2781</i>  | -2.45934889 | 0.000772 |
| PA5261   | <i>algR</i>    | -2.47274849 | 2.72E-40 |

|        |               |             |          |
|--------|---------------|-------------|----------|
| PA0952 | <i>PA0952</i> | -2.4731516  | 1.81E-31 |
| PA5255 | <i>algQ</i>   | -2.47325121 | 0        |
| PA3436 | <i>PA3436</i> | -2.47770147 | 6.94E-06 |
| PA3352 | <i>PA3352</i> | -2.47870201 | 0        |
| PA5449 | <i>wbpX</i>   | -2.48216964 | 1.72E-08 |
| PA2694 | <i>PA2694</i> | -2.48702709 | 6.96E-10 |
| PA3973 | <i>PA3973</i> | -2.4893909  | 6.78E-16 |
| PA2193 | <i>hcnA</i>   | -2.5006741  | 2.42E-06 |
| PA5526 | <i>PA5526</i> | -2.50364553 | 8.41E-18 |
| PA3788 | <i>PA3788</i> | -2.50745051 | 2.51E-10 |
| PA1120 | <i>tpbB</i>   | -2.50836825 | 1.67E-09 |
| PA5378 | <i>PA5378</i> | -2.50913633 | 4.64E-19 |
| PA4884 | <i>PA4884</i> | -2.51130666 | 1.19E-18 |
| PA5445 | <i>PA5445</i> | -2.51200305 | 7.89E-11 |
| PA3851 | <i>PA3851</i> | -2.51432147 | 1.04E-29 |
| PA1736 | <i>PA1736</i> | -2.51753594 | 4.85E-05 |
| PA0827 | <i>PA0827</i> | -2.52980616 | 0.000114 |
| PA3295 | <i>PA3295</i> | -2.53519547 | 6.09E-30 |
| PA2279 | <i>arsC</i>   | -2.53879686 | 2E-07    |
| PA5451 | <i>wzm</i>    | -2.54128394 | 3.13E-10 |
| PA1124 | <i>dgt</i>    | -2.54701027 | 1.94E-17 |
| PA0784 | <i>PA0784</i> | -2.54911922 | 3.2E-29  |
| PA1623 | <i>PA1623</i> | -2.55103644 | 1.12E-33 |
| PA3272 | <i>PA3272</i> | -2.55314322 | 0.000472 |
| PA3463 | <i>PA3463</i> | -2.55964837 | 9.85E-06 |
| PA1401 | <i>PA1401</i> | -2.56214521 | 0.00073  |
| PA1817 | <i>PA1817</i> | -2.56595574 | 1.94E-22 |
| PA1994 | <i>PA1994</i> | -2.56674164 | 1.03E-07 |
| PA2751 | <i>PA2751</i> | -2.57021313 | 0.000547 |
| PA3142 | <i>PA3142</i> | -2.57033672 | 2.31E-15 |
| PA2404 | <i>PA2404</i> | -2.58043766 | 7.46E-36 |
| PA4024 | <i>eutB</i>   | -2.58458066 | 0.000147 |
| PA1995 | <i>PA1995</i> | -2.58681559 | 1.35E-09 |
| PA2491 | <i>PA2491</i> | -2.5890104  | 1.39E-33 |
| PA4498 | <i>PA4498</i> | -2.58914653 | 1.88E-25 |
| PA3844 | <i>PA3844</i> | -2.5953217  | 3.49E-27 |
| PA4536 | <i>PA4536</i> | -2.60162475 | 5.64E-08 |
| PA2623 | <i>icd</i>    | -2.60767674 | 0        |
| PA5452 | <i>wbpW</i>   | -2.60961742 | 3.03E-15 |
| PA4712 | <i>PA4712</i> | -2.61038525 | 2.31E-06 |
| PA5461 | <i>PA5461</i> | -2.61184482 | 0        |
| PA5105 | <i>hutC</i>   | -2.61338805 | 4.08E-22 |
| PA4522 | <i>ampD</i>   | -2.62126135 | 1.49E-18 |

|         |                |             |          |
|---------|----------------|-------------|----------|
| PA3753  | <i>PA3753</i>  | -2.62227088 | 1.47E-19 |
| PA1603  | <i>PA1603</i>  | -2.62414531 | 5.39E-15 |
| PA1850  | <i>PA1850</i>  | -2.62443048 | 2.95E-05 |
| PA2773  | <i>PA2773</i>  | -2.62630148 | 0.000566 |
| PA4793  | <i>PA4793</i>  | -2.63224024 | 1.42E-29 |
| PA2026  | <i>PA2026</i>  | -2.63525508 | 2.06E-09 |
| PA4205  | <i>mexG</i>    | -2.64014249 | 3.64E-07 |
| PA5030  | <i>PA5030</i>  | -2.64316002 | 6.82E-39 |
| PA0905  | <i>rsmA</i>    | -2.64497775 | 0        |
| PA4366  | <i>sodB</i>    | -2.64750212 | 0        |
| PA4392  | <i>PA4392</i>  | -2.64951091 | 4.01E-06 |
| PA5163  | <i>rmlA</i>    | -2.65544355 | 0        |
| PA0830  | <i>PA0830</i>  | -2.66658702 | 1.21E-06 |
| PA5253  | <i>algP</i>    | -2.66659147 | 0        |
| PA3687  | <i>ppc</i>     | -2.67368819 | 1.13E-21 |
| PA0851  | <i>PA0851</i>  | -2.6880425  | 3.97E-15 |
| PA3098  | <i>xcpW</i>    | -2.68866503 | 7.42E-22 |
| PA5285  | <i>PA5285</i>  | -2.68869042 | 9.76E-55 |
| PA4677  | <i>PA4677</i>  | -2.69195352 | 1.51E-08 |
| PA2105  | <i>PA2105</i>  | -2.69552228 | 4.84E-10 |
| PA1119  | <i>yfiB</i>    | -2.6957655  | 2.17E-25 |
| PA4775  | <i>PA4775</i>  | -2.69745573 | 0.000337 |
| PA1879  | <i>PA1879</i>  | -2.70426731 | 1.22E-09 |
| PA0114  | <i>senC</i>    | -2.7133933  | 7.75E-27 |
| PA2659  | <i>PA2659</i>  | -2.71534016 | 8.85E-19 |
| PA2121  | <i>PA2121</i>  | -2.71652908 | 2.12E-05 |
| PA4636a | <i>PA4636a</i> | -2.72072447 | 8.69E-06 |
| PA0704  | <i>PA0704</i>  | -2.72089956 | 1.55E-11 |
| PA0424  | <i>mexR</i>    | -2.72240032 | 6.31E-37 |
| PA3300  | <i>fadD2</i>   | -2.72758137 | 9.36E-10 |
| PA4335  | <i>PA4335</i>  | -2.73294015 | 3.25E-10 |
| PA0604  | <i>PA0604</i>  | -2.73320225 | 7.55E-11 |
| PA3855  | <i>PA3855</i>  | -2.77213414 | 7.84E-19 |
| PA2831  | <i>PA2831</i>  | -2.78058719 | 9.45E-31 |
| PA3966  | <i>PA3966</i>  | -2.788447   | 4.84E-26 |
| PA5360  | <i>phoB</i>    | -2.79259356 | 1.99E-30 |
| PA0345  | <i>PA0345</i>  | -2.7952586  | 0.000971 |
| PA4773  | <i>PA4773</i>  | -2.7982977  | 5.2E-12  |
| PA3329  | <i>PA3329</i>  | -2.80477214 | 2.66E-06 |
| PA1852  | <i>PA1852</i>  | -2.80484313 | 0        |
| PA0846  | <i>PA0846</i>  | -2.81314534 | 2.49E-27 |
| PA0793  | <i>PA0793</i>  | -2.81340111 | 5.49E-15 |
| PA0344  | <i>PA0344</i>  | -2.81378519 | 1.31E-09 |

|             |                 |             |          |
|-------------|-----------------|-------------|----------|
| PA4633      | <i>PA4633</i>   | -2.82166804 | 4.95E-43 |
| PA0996      | <i>pqsA</i>     | -2.82957234 | 0.000827 |
| PA5520      | <i>PA5520</i>   | -2.83125723 | 4.08E-17 |
| PA5124      | <i>ntrB</i>     | -2.83751269 | 2.86E-28 |
| PA1358      | <i>PA1358</i>   | -2.84152848 | 7.53E-24 |
| PA3123      | <i>PA3123</i>   | -2.8427246  | 1.34E-21 |
| PA4108      | <i>PA4108</i>   | -2.84302955 | 1.76E-20 |
| PA1991      | <i>PA1991</i>   | -2.84366064 | 0.000482 |
| PA2280      | <i>PA2280</i>   | -2.846625   | 2.82E-08 |
| PA4183      | <i>PA4183</i>   | -2.84996466 | 6.16E-11 |
| PA2864      | <i>PA2864</i>   | -2.85464851 | 3.57E-37 |
| PA0741      | <i>PA0741</i>   | -2.85785343 | 0.000426 |
| PA2301      | <i>PA2301</i>   | -2.8672172  | 4.03E-11 |
| PA1181      | <i>PA1181</i>   | -2.87684354 | 2.36E-08 |
| PA1776      | <i>sigX</i>     | -2.88060055 | 8.01E-75 |
| PA3333      | <i>fabH2</i>    | -2.88400508 | 1.23E-08 |
| PA4147      | <i>acoR</i>     | -2.88843315 | 7.76E-07 |
| PA0737      | <i>PA0737</i>   | -2.89429026 | 4.85E-07 |
| PA4025      | <i>PA4025</i>   | -2.89646155 | 0.000731 |
| PA2723      | <i>PA2723</i>   | -2.90023606 | 5.75E-10 |
| PA5329      | <i>PA5329</i>   | -2.9014183  | 1.81E-27 |
| PA4041      | <i>PA4041</i>   | -2.90226556 | 4.87E-06 |
| PA1127      | <i>PA1127</i>   | -2.90808781 | 5.36E-14 |
| PA4309      | <i>pctA</i>     | -2.91005614 | 2.05E-44 |
| PA5020      | <i>PA5020</i>   | -2.91084594 | 4.02E-08 |
| PA2430      | <i>PA2430</i>   | -2.92380187 | 6.32E-05 |
| PA3238      | <i>PA3238</i>   | -2.92749991 | 3.08E-30 |
| PA0095      | <i>PA0095</i>   | -2.92891167 | 9.11E-15 |
| PA4641      | <i>PA4641</i>   | -2.93039935 | 6.38E-30 |
| PA3331      | <i>PA3331</i>   | -2.93166182 | 6.85E-13 |
| PA4827      | <i>PA4827</i>   | -2.93602068 | 1.23E-09 |
| PA3957      | <i>PA3957</i>   | -2.93634962 | 4.19E-11 |
| PA0436      | <i>PA0436</i>   | -2.93915136 | 3.35E-38 |
| PA1095      | <i>PA1095</i>   | -2.94333256 | 0        |
| PA1112.1    | <i>PA1112.1</i> | -2.94390053 | 0        |
| PA1523      | <i>xdhB</i>     | -2.95759769 | 4.65E-05 |
| PA0543      | <i>PA0543</i>   | -2.95795811 | 1.78E-05 |
| PA1402      | <i>PA1402</i>   | -2.95873696 | 0.000543 |
| <i>algZ</i> | <i>algZ</i>     | -2.9601252  | 7.29E-30 |
| PA2927      | <i>PA2927</i>   | -2.96812863 | 1.7E-09  |
| PA1672      | <i>PA1672</i>   | -2.97274459 | 1.24E-08 |
| PA0132      | <i>PA0132</i>   | -2.97370243 | 2.17E-08 |
| PA2633      | <i>PA2633</i>   | -2.97768339 | 2.63E-18 |

|        |               |             |          |
|--------|---------------|-------------|----------|
| PA4033 | <i>PA4033</i> | -2.99363545 | 6.1E-05  |
| PA0460 | <i>PA0460</i> | -2.99764259 | 7.43E-40 |
| PA2276 | <i>PA2276</i> | -3.01085581 | 0.000762 |
| PA3186 | <i>oprB</i>   | -3.02524282 | 3.85E-17 |
| PA1943 | <i>PA1943</i> | -3.02851586 | 4.54E-12 |
| PA3787 | <i>PA3787</i> | -3.03369268 | 9.81E-25 |
| PA0490 | <i>PA0490</i> | -3.03531415 | 9.94E-11 |
| PA2682 | <i>PA2682</i> | -3.03838491 | 7.55E-06 |
| PA3906 | <i>PA3906</i> | -3.04292601 | 3.18E-14 |
| PA4774 | <i>PA4774</i> | -3.05033317 | 0.000109 |
| PA5527 | <i>PA5527</i> | -3.05433381 | 1.54E-65 |
| PA1033 | <i>PA1033</i> | -3.0552618  | 5.31E-41 |
| PA0731 | <i>PA0731</i> | -3.05526761 | 9.25E-25 |
| PA2668 | <i>PA2668</i> | -3.0570864  | 4.63E-24 |
| PA4040 | <i>PA4040</i> | -3.0642453  | 2.43E-05 |
| PA0871 | <i>phhB</i>   | -3.06617286 | 5.58E-85 |
| PA2949 | <i>PA2949</i> | -3.06972887 | 2.25E-16 |
| PA0794 | <i>PA0794</i> | -3.07537043 | 1.81E-17 |
| PA4914 | <i>PA4914</i> | -3.08363219 | 0.000289 |
| PA4382 | <i>PA4382</i> | -3.09447152 | 1.21E-06 |
| PA2608 | <i>PA2608</i> | -3.09479322 | 1.92E-22 |
| PA2549 | <i>PA2549</i> | -3.09899923 | 1.1E-13  |
| PA1437 | <i>PA1437</i> | -3.11046047 | 1.1E-06  |
| PA3430 | <i>PA3430</i> | -3.11171078 | 4.38E-22 |
| PA2605 | <i>PA2605</i> | -3.11353721 | 6.62E-39 |
| PA5249 | <i>PA5249</i> | -3.11602605 | 1.26E-20 |
| PA5454 | <i>rmd</i>    | -3.11791671 | 4.1E-36  |
| PA4182 | <i>PA4182</i> | -3.11925944 | 8.36E-29 |
| PA0380 | <i>PA0380</i> | -3.12297397 | 3.09E-19 |
| PA1814 | <i>PA1814</i> | -3.12632502 | 1.54E-41 |
| PA4495 | <i>PA4495</i> | -3.1266775  | 2.11E-65 |
| PA0959 | <i>PA0959</i> | -3.13320422 | 3.57E-37 |
| PA4955 | <i>PA4955</i> | -3.13427975 | 5.82E-21 |
| PA3096 | <i>xcpY</i>   | -3.13768583 | 2.53E-31 |
| PA4345 | <i>PA4345</i> | -3.15188331 | 2.08E-31 |
| PA4927 | <i>PA4927</i> | -3.16422133 | 2.11E-08 |
| PA3217 | <i>cyaB</i>   | -3.16455071 | 1.44E-27 |
| PA3097 | <i>xcpX</i>   | -3.16865095 | 3.6E-25  |
| PA2344 | <i>mtlZ</i>   | -3.18982692 | 1.38E-09 |
| PA0540 | <i>PA0540</i> | -3.1907363  | 6.73E-10 |
| PA5164 | <i>rmlC</i>   | -3.20126229 | 4.93E-66 |
| PA4994 | <i>PA4994</i> | -3.21711667 | 8.49E-05 |
| PA0364 | <i>PA0364</i> | -3.22325209 | 4.56E-05 |

|        |               |             |          |
|--------|---------------|-------------|----------|
| PA5104 | <i>PA5104</i> | -3.24409846 | 1.17E-14 |
| PA0099 | <i>PA0099</i> | -3.24536312 | 1.01E-06 |
| PA4717 | <i>PA4717</i> | -3.25062637 | 2.19E-56 |
| PA1121 | <i>yfiR</i>   | -3.26942803 | 1.22E-15 |
| PA3908 | <i>PA3908</i> | -3.27425694 | 1.87E-40 |
| PA3867 | <i>PA3867</i> | -3.27698037 | 1.33E-07 |
| PA2764 | <i>PA2764</i> | -3.27989434 | 7.16E-45 |
| PA2244 | <i>pslN</i>   | -3.290501   | 6.5E-06  |
| PA3079 | <i>PA3079</i> | -3.29057194 | 3.32E-20 |
| PA2814 | <i>PA2814</i> | -3.29336373 | 4.6E-09  |
| PA3919 | <i>PA3919</i> | -3.29925379 | 2.32E-55 |
| PA5060 | <i>phaF</i>   | -3.30345954 | 0        |
| PA0810 | <i>PA0810</i> | -3.31879613 | 6.54E-12 |
| PA2358 | <i>PA2358</i> | -3.31999977 | 0.000453 |
| PA2883 | <i>PA2883</i> | -3.32907248 | 1.51E-21 |
| PA3327 | <i>PA3327</i> | -3.33801042 | 3.91E-10 |
| PA3351 | <i>flgM</i>   | -3.34497805 | 0        |
| PA5108 | <i>PA5108</i> | -3.34612988 | 2.72E-61 |
| PA1342 | <i>PA1342</i> | -3.35047498 | 0        |
| PA4346 | <i>PA4346</i> | -3.35486611 | 0.000145 |
| PA3221 | <i>csaA</i>   | -3.35670776 | 1.57E-30 |
| PA3373 | <i>PA3373</i> | -3.36235051 | 3.88E-30 |
| PA3779 | <i>PA3779</i> | -3.37945769 | 1.54E-07 |
| PA2893 | <i>atuH</i>   | -3.38652338 | 0.000769 |
| PA5028 | <i>PA5028</i> | -3.39021499 | 5.42E-63 |
| PA1472 | <i>PA1472</i> | -3.39037747 | 1.3E-07  |
| PA1753 | <i>PA1753</i> | -3.39226288 | 5.34E-38 |
| PA0960 | <i>PA0960</i> | -3.39385129 | 8.07E-17 |
| PA1189 | <i>PA1189</i> | -3.39969168 | 1.98E-09 |
| PA4378 | <i>inaA</i>   | -3.40907918 | 6.95E-50 |
| PA2897 | <i>PA2897</i> | -3.40979011 | 2.7E-109 |
| PA1545 | <i>PA1545</i> | -3.42722312 | 1.71E-50 |
| PA1430 | <i>lasR</i>   | -3.43688184 | 9.5E-74  |
| PA3254 | <i>PA3254</i> | -3.44403419 | 2.66E-10 |
| PA4889 | <i>PA4889</i> | -3.44671088 | 0.000306 |
| PA1328 | <i>PA1328</i> | -3.45137385 | 1.81E-24 |
| PA1737 | <i>PA1737</i> | -3.4557708  | 2.98E-13 |
| PA2830 | <i>htpX</i>   | -3.45657229 | 8.36E-90 |
| PA0505 | <i>PA0505</i> | -3.45840278 | 1.1E-127 |
| PA3682 | <i>PA3682</i> | -3.46195373 | 3.99E-16 |
| PA1945 | <i>PA1945</i> | -3.46384965 | 7.39E-07 |
| PA4364 | <i>PA4364</i> | -3.46450954 | 3.02E-16 |
| PA4456 | <i>PA4456</i> | -3.48119836 | 1.21E-97 |



|        |               |             |          |
|--------|---------------|-------------|----------|
| PA5213 | <i>gcvP1</i>  | -3.48196231 | 4.51E-14 |
| PA2489 | <i>PA2489</i> | -3.49579345 | 7.49E-10 |
| PA3459 | <i>PA3459</i> | -3.51885442 | 3.5E-78  |
| PA4926 | <i>PA4926</i> | -3.5283189  | 9.01E-08 |
| PA4326 | <i>PA4326</i> | -3.53045572 | 5.69E-41 |
| PA3080 | <i>PA3080</i> | -3.53689779 | 5.66E-63 |
| PA2989 | <i>PA2989</i> | -3.53758501 | 3.23E-22 |
| PA3825 | <i>PA3825</i> | -3.54175978 | 1.52E-12 |
| PA1951 | <i>PA1951</i> | -3.54901906 | 2.08E-13 |
| PA0572 | <i>PA0572</i> | -3.56748882 | 4.4E-103 |
| PA1198 | <i>PA1198</i> | -3.59676285 | 1.5E-154 |
| PA2750 | <i>PA2750</i> | -3.61848657 | 1.07E-43 |
| PA0853 | <i>PA0853</i> | -3.6264027  | 2.58E-17 |
| PA5521 | <i>PA5521</i> | -3.62768913 | 1.83E-77 |
| PA0422 | <i>PA0422</i> | -3.62814473 | 5.44E-72 |
| PA1423 | <i>bdIA</i>   | -3.62950043 | 3.08E-22 |
| PA5073 | <i>PA5073</i> | -3.63178994 | 1.79E-68 |
| PA1592 | <i>PA1592</i> | -3.6417129  | 0        |
| PA1191 | <i>PA1191</i> | -3.64200191 | 1.09E-16 |
| PA4605 | <i>PA4605</i> | -3.65384341 | 2.87E-45 |
| PA0804 | <i>PA0804</i> | -3.66162836 | 9.43E-52 |
| PA0734 | <i>PA0734</i> | -3.66952237 | 6.69E-12 |
| PA4875 | <i>PA4875</i> | -3.67831663 | 4.95E-27 |
| PA0462 | <i>PA0462</i> | -3.68068532 | 6.55E-60 |
| PA5453 | <i>gmd</i>    | -3.69672877 | 1E-69    |
| PA5528 | <i>PA5528</i> | -3.70090178 | 0        |
| PA4635 | <i>PA4635</i> | -3.70404304 | 2.33E-06 |
| PA0839 | <i>PA0839</i> | -3.71643086 | 7.03E-20 |
| PA0777 | <i>PA0777</i> | -3.71751654 | 1.78E-16 |
| PA0988 | <i>PA0988</i> | -3.719233   | 1.51E-56 |
| PA3089 | <i>PA3089</i> | -3.72646465 | 3.67E-10 |
| PA4034 | <i>aqpZ</i>   | -3.7335744  | 5.21E-11 |
| PA2373 | <i>PA2373</i> | -3.73625729 | 5.21E-11 |
| PA1887 | <i>PA1887</i> | -3.74895132 | 1.8E-05  |
| PA4384 | <i>PA4384</i> | -3.76434967 | 6.08E-28 |
| PA0689 | <i>PA0689</i> | -3.77771868 | 5.18E-33 |
| PA3756 | <i>PA3756</i> | -3.78514569 | 8.4E-104 |
| PA3846 | <i>PA3846</i> | -3.79827878 | 1.83E-76 |
| PA3426 | <i>PA3426</i> | -3.80170234 | 3.83E-26 |
| PA2716 | <i>PA2716</i> | -3.80369497 | 4.17E-09 |
| PA4444 | <i>mltB1</i>  | -3.80755345 | 1.97E-47 |
| PA1408 | <i>PA1408</i> | -3.8122352  | 1.11E-08 |
| PA5276 | <i>lppL</i>   | -3.8231069  | 4.62E-26 |

|        |               |             |          |
|--------|---------------|-------------|----------|
| PA0557 | <i>PA0557</i> | -3.82317962 | 3.54E-14 |
| PA3581 | <i>glpF</i>   | -3.83636123 | 1.23E-92 |
| PA2511 | <i>PA2511</i> | -3.83751746 | 7.06E-09 |
| PA0315 | <i>PA0315</i> | -3.83950215 | 0        |
| PA0452 | <i>PA0452</i> | -3.85392404 | 6.7E-06  |
| PA1939 | <i>PA1939</i> | -3.86890129 | 2.79E-88 |
| PA4591 | <i>PA4591</i> | -3.88872078 | 2.2E-07  |
| PA3740 | <i>PA3740</i> | -3.91257947 | 1.03E-62 |
| PA0507 | <i>PA0507</i> | -3.92155292 | 9.55E-07 |
| PA3095 | <i>xcpZ</i>   | -3.9220883  | 1.5E-26  |
| PA2915 | <i>PA2915</i> | -3.92596982 | 1.39E-44 |
| PA5361 | <i>phoR</i>   | -3.93497275 | 2.89E-16 |
| PA0029 | <i>PA0029</i> | -3.94731077 | 0.000969 |
| PA5462 | <i>PA5462</i> | -3.95198066 | 3.66E-36 |
| PA3711 | <i>PA3711</i> | -3.95529666 | 5.26E-25 |
| PA3572 | <i>PA3572</i> | -3.95545052 | 4.76E-27 |
| PA1895 | <i>PA1895</i> | -3.95841797 | 4.15E-06 |
| PA1749 | <i>PA1749</i> | -3.9604792  | 4.1E-122 |
| PA3103 | <i>xcpR</i>   | -3.97712863 | 6.9E-109 |
| PA3684 | <i>PA3684</i> | -3.98823061 | 5.95E-25 |
| PA5106 | <i>PA5106</i> | -3.98849776 | 1.11E-20 |
| PA3332 | <i>PA3332</i> | -3.98940351 | 1.16E-27 |
| PA1202 | <i>PA1202</i> | -3.99968377 | 3E-152   |
| PA4606 | <i>PA4606</i> | -4.00038824 | 4E-111   |
| PA0269 | <i>PA0269</i> | -4.00561001 | 1.53E-06 |
| PA2788 | <i>PA2788</i> | -4.01706352 | 2.2E-119 |
| PA3907 | <i>PA3907</i> | -4.02326525 | 2.1E-23  |
| PA4327 | <i>PA4327</i> | -4.04158055 | 2E-15    |
| PA4681 | <i>PA4681</i> | -4.04576366 | 8.17E-05 |
| PA2780 | <i>PA2780</i> | -4.04776793 | 1.2E-11  |
| PA5234 | <i>PA5234</i> | -4.07450143 | 2.6E-47  |
| PA3102 | <i>xcpS</i>   | -4.07938218 | 8.87E-69 |
| PA4782 | <i>PA4782</i> | -4.08480848 | 3.09E-35 |
| PA2796 | <i>tal</i>    | -4.10803228 | 4.8E-154 |
| PA3905 | <i>PA3905</i> | -4.11354711 | 6.49E-13 |
| PA2378 | <i>PA2378</i> | -4.11622158 | 8.87E-32 |
| PA0854 | <i>fumC2</i>  | -4.11729443 | 2.09E-63 |
| PA4190 | <i>pqsL</i>   | -4.11979588 | 9.35E-65 |
| PA3100 | <i>xcpU</i>   | -4.13139908 | 3.7E-106 |
| PA3140 | <i>PA3140</i> | -4.13321105 | 1.5E-09  |
| PA4397 | <i>panE</i>   | -4.15324057 | 4.72E-12 |
| PA2376 | <i>PA2376</i> | -4.155419   | 0.000591 |
| PA3236 | <i>PA3236</i> | -4.17308381 | 3.04E-05 |

|         |                |             |          |
|---------|----------------|-------------|----------|
| PA3105  | <i>xcpQ</i>    | -4.18057142 | 2.3E-114 |
| PA1872  | <i>PA1872</i>  | -4.2178736  | 1.24E-60 |
| PA0855  | <i>PA0855</i>  | -4.23730181 | 5.03E-19 |
| PA2879  | <i>PA2879</i>  | -4.23779859 | 1.29E-40 |
| PA2702  | <i>PA2702</i>  | -4.24433899 | 1.09E-23 |
| PA2755a | <i>PA2755a</i> | -4.25033087 | 5.4E-99  |
| PA5380  | <i>gbdR</i>    | -4.2576463  | 3.44E-22 |
| PA3690  | <i>PA3690</i>  | -4.25901663 | 6.58E-41 |
| PA3120  | <i>leuD</i>    | -4.27035635 | 4.1E-108 |
| PA3526  | <i>PA3526</i>  | -4.27162731 | 1.18E-66 |
| PA3965  | <i>PA3965</i>  | -4.27559053 | 1.22E-94 |
| PA0788  | <i>PA0788</i>  | -4.27797009 | 2.18E-07 |
| PA3031  | <i>PA3031</i>  | -4.27837971 | 0        |
| PA2114  | <i>PA2114</i>  | -4.28408586 | 0.000963 |
| PA0012  | <i>PA0012</i>  | -4.29843557 | 5.59E-24 |
| PA2189  | <i>PA2189</i>  | -4.30152643 | 4.1E-06  |
| PA2678  | <i>PA2678</i>  | -4.30477034 | 1.85E-05 |
| PA5421  | <i>fdhA</i>    | -4.31452984 | 1.85E-05 |
| PA0982  | <i>PA0982</i>  | -4.34759556 | 2.08E-33 |
| PA1122  | <i>PA1122</i>  | -4.35188523 | 1.4E-51  |
| PA1159  | <i>PA1159</i>  | -4.35567328 | 1.66E-97 |
| PA4379  | <i>PA4379</i>  | -4.3620076  | 3.6E-100 |
| PA2786  | <i>PA2786</i>  | -4.36884333 | 6E-17    |
| PA4206  | <i>mexH</i>    | -4.39249366 | 6.29E-13 |
| PA0732  | <i>PA0732</i>  | -4.39802416 | 4.92E-35 |
| PA0473  | <i>PA0473</i>  | -4.41569501 | 1.04E-31 |
| PA0447  | <i>gcdH</i>    | -4.42323287 | 7.73E-54 |
| PA0366  | <i>PA0366</i>  | -4.42721895 | 4.24E-32 |
| PA0524  | <i>norB</i>    | -4.43144239 | 0.000358 |
| PA4010  | <i>PA4010</i>  | -4.4389084  | 7.3E-115 |
| PA2047  | <i>PA2047</i>  | -4.44430422 | 3.9E-17  |
| PA3261  | <i>PA3261</i>  | -4.44447795 | 6.73E-70 |
| PA3039  | <i>PA3039</i>  | -4.45504308 | 3.5E-07  |
| PA4499  | <i>PA4499</i>  | -4.47299112 | 2.83E-48 |
| PA1345  | <i>PA1345</i>  | -4.47720115 | 3.37E-07 |
| PA3496  | <i>PA3496</i>  | -4.47857549 | 2.28E-14 |
| PA4176  | <i>ppiC2</i>   | -4.49060424 | 1.9E-113 |
| PA3551  | <i>algA</i>    | -4.50242523 | 4.4E-30  |
| PA0805  | <i>PA0805</i>  | -4.50535824 | 3.7E-157 |
| PA3969  | <i>PA3969</i>  | -4.50621288 | 2.55E-86 |
| PA2708  | <i>PA2708</i>  | -4.51040289 | 1.21E-07 |
| PA3104  | <i>xcpP</i>    | -4.51398003 | 1.12E-85 |
| PA2878  | <i>PA2878</i>  | -4.5314847  | 1.05E-18 |

|        |               |             |          |
|--------|---------------|-------------|----------|
| PA1617 | <i>PA1617</i> | -4.54060999 | 5.48E-40 |
| PA5103 | <i>PA5103</i> | -4.56511209 | 1.23E-24 |
| PA3392 | <i>nosZ</i>   | -4.57126352 | 7.23E-08 |
| PA1641 | <i>PA1641</i> | -4.58683579 | 4.82E-09 |
| PA3689 | <i>PA3689</i> | -4.60023336 | 5.82E-87 |
| PA0575 | <i>PA0575</i> | -4.62583759 | 8.79E-20 |
| PA3945 | <i>PA3945</i> | -4.62826932 | 9.12E-67 |
| PA4362 | <i>PA4362</i> | -4.65797451 | 2E-29    |
| PA1250 | <i>aprI</i>   | -4.69605011 | 5.65E-52 |
| PA2621 | <i>PA2621</i> | -4.69645167 | 9.73E-85 |
| PA2787 | <i>cpg2</i>   | -4.69794947 | 6.49E-35 |
| PA0365 | <i>PA0365</i> | -4.70375427 | 8.3E-16  |
| PA2555 | <i>PA2555</i> | -4.71087488 | 1.33E-09 |
| PA0861 | <i>PA0861</i> | -4.71921394 | 3.07E-59 |
| PA2477 | <i>PA2477</i> | -4.74154717 | 2.58E-05 |
| PA0049 | <i>PA0049</i> | -4.753193   | 1.07E-10 |
| PA1106 | <i>PA1106</i> | -4.7551554  | 9.4E-103 |
| PA2327 | <i>PA2327</i> | -4.76674746 | 2.84E-67 |
| PA1944 | <i>PA1944</i> | -4.76817107 | 5.49E-47 |
| PA1136 | <i>PA1136</i> | -4.77098161 | 1.4E-12  |
| PA2076 | <i>PA2076</i> | -4.7743402  | 1.74E-20 |
| PA5191 | <i>PA5191</i> | -4.78576237 | 2.99E-36 |
| PA5306 | <i>PA5306</i> | -4.79102543 | 0.000513 |
| PA2329 | <i>PA2329</i> | -4.799753   | 6.65E-88 |
| PA2985 | <i>PA2985</i> | -4.80155686 | 8.73E-83 |
| PA5180 | <i>PA5180</i> | -4.82057284 | 9.91E-72 |
| PA4117 | <i>bphP</i>   | -4.84268881 | 5.6E-122 |
| PA4207 | <i>mexI</i>   | -4.85126152 | 8.64E-12 |
| PA4336 | <i>PA4336</i> | -4.8654287  | 5.09E-41 |
| PA4733 | <i>acsB</i>   | -4.86878988 | 3.11E-26 |
| PA0270 | <i>PA0270</i> | -4.87117247 | 6.68E-14 |
| PA1118 | <i>PA1118</i> | -4.90407603 | 1.67E-65 |
| PA3041 | <i>PA3041</i> | -4.92337243 | 2E-87    |
| PA3929 | <i>cioB</i>   | -4.92400384 | 6.5E-109 |
| PA3307 | <i>PA3307</i> | -4.93533913 | 5.2E-70  |
| PA2799 | <i>PA2799</i> | -4.94428281 | 2.52E-44 |
| PA2938 | <i>PA2938</i> | -4.98099612 | 3.98E-05 |
| PA4365 | <i>PA4365</i> | -5.01793506 | 4.51E-19 |
| PA3852 | <i>PA3852</i> | -5.05325783 | 4.2E-129 |
| PA3534 | <i>PA3534</i> | -5.06006833 | 1.39E-08 |
| PA0840 | <i>PA0840</i> | -5.06217399 | 3.03E-59 |
| PA1774 | <i>crfX</i>   | -5.08079154 | 1.2E-114 |
| PA1761 | <i>PA1761</i> | -5.08703125 | 1.28E-59 |

|         |                |             |          |
|---------|----------------|-------------|----------|
| PA1167  | <i>PA1167</i>  | -5.14783146 | 2.27E-39 |
| PA0459  | <i>PA0459</i>  | -5.1484268  | 4.77E-91 |
| PA4993  | <i>PA4993</i>  | -5.18481744 | 2.04E-88 |
| PA3858  | <i>PA3858</i>  | -5.19086085 | 9.36E-86 |
| PA3795  | <i>PA3795</i>  | -5.19695575 | 5.7E-117 |
| PA2306  | <i>ambA</i>    | -5.20602843 | 1.03E-92 |
| PA4714  | <i>PA4714</i>  | -5.20639362 | 1.8E-179 |
| PA2679  | <i>PA2679</i>  | -5.22390226 | 4.96E-28 |
| PA2504  | <i>PA2504</i>  | -5.22891033 | 1.49E-35 |
| PA3427  | <i>PA3427</i>  | -5.24651087 | 9.54E-35 |
| PA3180  | <i>PA3180</i>  | -5.31779587 | 4.9E-101 |
| PA4830  | <i>PA4830</i>  | -5.33190585 | 3.19E-57 |
| PA0951a | <i>PA0951a</i> | -5.33265428 | 3.2E-126 |
| PA0795  | <i>prpC</i>    | -5.33781602 | 8.9E-124 |
| PA3253  | <i>PA3253</i>  | -5.33800114 | 2.22E-10 |
| PA3094  | <i>PA3094</i>  | -5.3488219  | 8.1E-143 |
| PA5182  | <i>PA5182</i>  | -5.38518335 | 3.5E-100 |
| PA2887  | <i>atuB</i>    | -5.39908859 | 2.69E-06 |
| PA3252  | <i>PA3252</i>  | -5.39923538 | 2.22E-10 |
| PA4325  | <i>PA4325</i>  | -5.42670469 | 8.3E-135 |
| PA2791  | <i>PA2791</i>  | -5.44183756 | 7.74E-16 |
| PA3833  | <i>PA3833</i>  | -5.47719778 | 5.96E-84 |
| PA2328  | <i>PA2328</i>  | -5.47732481 | 1.49E-85 |
| PA3188  | <i>PA3188</i>  | -5.53032533 | 2.11E-09 |
| PA2374  | <i>PA2374</i>  | -5.53364097 | 3.78E-11 |
| PA1190  | <i>PA1190</i>  | -5.53399544 | 9.28E-42 |
| PA1149  | <i>PA1149</i>  | -5.5469989  | 2.65E-05 |
| PA2111  | <i>PA2111</i>  | -5.55429854 | 9.14E-09 |
| PA1762  | <i>PA1762</i>  | -5.55566174 | 1.79E-14 |
| PA3099  | <i>xcpV</i>    | -5.55713615 | 1.23E-36 |
| PA3963a | <i>PA3963a</i> | -5.55762577 | 5.21E-05 |
| PA5297  | <i>poxB</i>    | -5.5748815  | 2.93E-40 |
| PA1112  | <i>PA1112</i>  | -5.6070434  | 3.1E-117 |
| PA2415  | <i>PA2415</i>  | -5.66546091 | 4.86E-10 |
| PA4312  | <i>PA4312</i>  | -5.67597535 | 5.9E-103 |
| PA2816  | <i>PA2816</i>  | -5.69295969 | 9.92E-68 |
| PA5546  | <i>PA5546</i>  | -5.69697982 | 2E-186   |
| PA5061  | <i>PA5061</i>  | -5.70009284 | 2.1E-187 |
| PA0558  | <i>PA0558</i>  | -5.70098766 | 9.5E-102 |
| PA2330  | <i>PA2330</i>  | -5.7064636  | 5.1E-108 |
| PA3372  | <i>PA3372</i>  | -5.72129091 | 3.73E-60 |
| PA2779  | <i>PA2779</i>  | -5.72151411 | 7.77E-54 |
| PA4828  | <i>PA4828</i>  | -5.72781975 | 2.63E-20 |

|         |                |             |          |
|---------|----------------|-------------|----------|
| PA3273  | <i>PA3273</i>  | -5.73503304 | 8.37E-10 |
| PA0180  | <i>cttP</i>    | -5.75874064 | 4.87E-80 |
| PA0173  | <i>PA0173</i>  | -5.78638969 | 0.000401 |
| PA0676  | <i>vreR</i>    | -5.79702374 | 2.52E-42 |
| PA3568  | <i>PA3568</i>  | -5.88730761 | 1.55E-16 |
| PA1575  | <i>PA1575</i>  | -5.88742864 | 2.58E-76 |
| PA1894  | <i>PA1894</i>  | -5.93616385 | 9.86E-06 |
| PA1003  | <i>mvfR</i>    | -5.9372887  | 1.3E-139 |
| PA4829  | <i>lpd3</i>    | -5.94781736 | 9.94E-22 |
| PA4289  | <i>PA4289</i>  | -5.95839158 | 2.67E-30 |
| PA4915  | <i>PA4915</i>  | -5.9649764  | 3.72E-44 |
| PA0690  | <i>PA0690</i>  | -5.97874217 | 1.77E-20 |
| PA0039  | <i>PA0039</i>  | -5.98218376 | 3.5E-199 |
| PA5098  | <i>hutH</i>    | -6.05923596 | 5.64E-08 |
| PA1111  | <i>PA1111</i>  | -6.08213194 | 4.29E-05 |
| PA4786  | <i>PA4786</i>  | -6.10255313 | 2.28E-30 |
| PA5437  | <i>PA5437</i>  | -6.11200301 | 2.2E-157 |
| PA4112  | <i>PA4112</i>  | -6.12079428 | 4.04E-43 |
| PA3570  | <i>mmsA</i>    | -6.15067    | 1.48E-77 |
| PA3920  | <i>PA3920</i>  | -6.18311997 | 4.29E-27 |
| PA4497  | <i>PA4497</i>  | -6.19037782 | 5.76E-72 |
| PA1048  | <i>PA1048</i>  | -6.19645931 | 3.7E-175 |
| PA1989  | <i>pqqE</i>    | -6.21044132 | 1.32E-18 |
| PA5545  | <i>PA5545</i>  | -6.22896856 | 1.04E-97 |
| PA0743  | <i>PA0743</i>  | -6.22925357 | 1.69E-30 |
| PA2345  | <i>PA2345</i>  | -6.23010709 | 2.97E-74 |
| PA2277  | <i>arsR</i>    | -6.23775508 | 4.81E-28 |
| PA3928  | <i>PA3928</i>  | -6.27277224 | 2.2E-134 |
| PA4624  | <i>PA4624</i>  | -6.28624761 | 1.04E-19 |
| PA1471  | <i>PA1471</i>  | -6.34340326 | 6.9E-130 |
| PA2338  | <i>PA2338</i>  | -6.35071763 | 4.25E-07 |
| PA2550  | <i>PA2550</i>  | -6.35299305 | 2.54E-26 |
| PA0050  | <i>PA0050</i>  | -6.35705443 | 1.7E-110 |
| PA4785  | <i>PA4785</i>  | -6.36488672 | 1.39E-25 |
| PA0788a | <i>PA0788a</i> | -6.36762756 | 6.14E-42 |
| PA0306a | <i>PA0306a</i> | -6.37030868 | 5.95E-36 |
| PA0143  | <i>nuh</i>     | -6.38210691 | 1E-144   |
| PA2580  | <i>PA2580</i>  | -6.42923736 | 1.11E-20 |
| PA1107  | <i>PA1107</i>  | -6.47859077 | 1.81E-18 |
| PA2475  | <i>PA2475</i>  | -6.50163763 | 2.23E-29 |
| PA3346  | <i>PA3346</i>  | -6.51756123 | 2.1E-129 |
| PA2490  | <i>PA2490</i>  | -6.54046033 | 1.62E-22 |
| PA3930  | <i>cioA</i>    | -6.54651106 | 8.5E-146 |

|          |                 |             |          |
|----------|-----------------|-------------|----------|
| PA0797   | <i>PA0797</i>   | -6.55660627 | 4.64E-81 |
| PA0742   | <i>PA0742</i>   | -6.62580455 | 1.3E-16  |
| PA0847   | <i>PA0847</i>   | -6.63189318 | 3.14E-17 |
| PA0035   | <i>trpA</i>     | -6.63887394 | 1.1E-113 |
| PA1990   | <i>pqqH</i>     | -6.64487912 | 7.84E-08 |
| PA2771   | <i>PA2771</i>   | -6.65712679 | 1.52E-93 |
| PA2593   | <i>qteE</i>     | -6.66010176 | 7.93E-19 |
| PA5227.1 | <i>ssrS</i>     | -6.66235688 | 5.7E-227 |
| PA0806   | <i>PA0806</i>   | -6.72014009 | 1.38E-05 |
| PA3101   | <i>xcpT</i>     | -6.73243729 | 4.31E-31 |
| PA2790   | <i>PA2790</i>   | -6.73578539 | 6.6E-104 |
| PA5395   | <i>PA5395</i>   | -6.76694464 | 1.61E-14 |
| PA2339   | <i>PA2339</i>   | -6.78993253 | 0.000105 |
| PA4654   | <i>PA4654</i>   | -6.83693312 | 0.000806 |
| PA5424   | <i>PA5424</i>   | -6.83863302 | 4.8E-177 |
| PA1348   | <i>PA1348</i>   | -6.87092618 | 2.55E-09 |
| PA1643a  | <i>PA1643a</i>  | -6.87648946 | 7.2E-102 |
| PA0701   | <i>PA0701</i>   | -6.8803249  | 4.45E-08 |
| PA1650   | <i>PA1650</i>   | -6.9060892  | 1.15E-41 |
| PA4496   | <i>PA4496</i>   | -6.91799175 | 3.6E-135 |
| PA4338   | <i>PA4338</i>   | -6.91981907 | 1.6E-27  |
| PA0983   | <i>PA0983</i>   | -6.92937396 | 2.48E-36 |
| PA2379   | <i>PA2379</i>   | -6.94069289 | 7.79E-79 |
| PA2360   | <i>PA2360</i>   | -6.95539907 | 5.76E-18 |
| PA4608   | <i>PA4608</i>   | -6.98558978 | 6.3E-165 |
| PA4874   | <i>PA4874</i>   | -6.98714365 | 2.5E-160 |
| PA2560   | <i>PA2560</i>   | -6.99582954 | 8.6E-134 |
| PA3462   | <i>PA3462</i>   | -7.01059806 | 1.1E-10  |
| PA3040   | <i>PA3040</i>   | -7.08535752 | 6.1E-165 |
| PA1988   | <i>pqqD</i>     | -7.1097789  | 7.34E-25 |
| PA0007   | <i>PA0007</i>   | -7.13457323 | 1.05E-49 |
| PA1287   | <i>PA1287</i>   | -7.17249151 | 8.1E-162 |
| PA4650   | <i>PA4650</i>   | -7.18448341 | 7.16E-29 |
| PA0256   | <i>PA0256</i>   | -7.18465107 | 3.5E-52  |
| PA2177   | <i>PA2177</i>   | -7.18674962 | 2.42E-19 |
| PA1333   | <i>PA1333</i>   | -7.18788306 | 3.35E-19 |
| PA3023   | <i>PA3023</i>   | -7.20898817 | 1.83E-59 |
| PA3042   | <i>PA3042</i>   | -7.23026493 | 5.9E-109 |
| PA1648   | <i>PA1648</i>   | -7.23344795 | 2.95E-24 |
| PA5181.1 | <i>PA5181.1</i> | -7.25827509 | 5.59E-53 |
| PA5181   | <i>PA5181</i>   | -7.2679939  | 1.73E-82 |
| PA0656   | <i>PA0656</i>   | -7.31280325 | 9.3E-139 |
| PA2562   | <i>PA2562</i>   | -7.3156872  | 1.2E-145 |

|         |                |             |          |
|---------|----------------|-------------|----------|
| PA3216  | <i>PA3216</i>  | -7.31682227 | 7.63E-20 |
| PA3311  | <i>PA3311</i>  | -7.33307372 | 7.4E-26  |
| PA2364  | <i>PA2364</i>  | -7.34131057 | 1.3E-27  |
| PA0179  | <i>PA0179</i>  | -7.37461341 | 1.6E-136 |
| PA0286  | <i>desA</i>    | -7.43518067 | 2.3E-63  |
| PA2361  | <i>PA2361</i>  | -7.43575515 | 1.16E-13 |
| PA2553  | <i>PA2553</i>  | -7.44596499 | 2.08E-80 |
| PA2618  | <i>PA2618</i>  | -7.4600081  | 1.6E-114 |
| PA4300  | <i>tadC</i>    | -7.47622387 | 8.77E-17 |
| PA0803  | <i>PA0803</i>  | -7.51898991 | 3.36E-97 |
| PA0213  | <i>PA0213</i>  | -7.52739318 | 9.5E-15  |
| PA0796  | <i>prpB</i>    | -7.52918825 | 1.3E-146 |
| PA3472  | <i>PA3472</i>  | -7.52946722 | 2.7E-142 |
| PA0216  | <i>PA0216</i>  | -7.5347629  | 1.89E-12 |
| PA1731  | <i>PA1731</i>  | -7.59724655 | 3.14E-55 |
| PA2807  | <i>PA2807</i>  | -7.60067016 | 7.86E-05 |
| PA5271  | <i>PA5271</i>  | -7.60750892 | 6.5E-120 |
| PA2920  | <i>PA2920</i>  | -7.62150129 | 2.3E-112 |
| PA2414  | <i>PA2414</i>  | -7.65843919 | 1.24E-37 |
| PA1878  | <i>PA1878</i>  | -7.6771429  | 8.4E-101 |
| PA1882  | <i>PA1882</i>  | -7.68806415 | 2.43E-11 |
| PA4351  | <i>PA4351</i>  | -7.69315376 | 1.12E-89 |
| PA4293  | <i>pprA</i>    | -7.78407816 | 6.7E-19  |
| PA0329  | <i>PA0329</i>  | -7.7853917  | 3E-185   |
| PA3121  | <i>leuC</i>    | -7.79650592 | 1.6E-158 |
| PA5099  | <i>PA5099</i>  | -7.80635747 | 1.41E-10 |
| PA4212  | <i>phzC1</i>   | -7.80981468 | 7.29E-36 |
| PA1963  | <i>PA1963</i>  | -7.86416575 | 1.16E-25 |
| PA3540  | <i>algD</i>    | -7.8707083  | 1.7E-128 |
| PA2869  | <i>PA2869</i>  | -7.88376769 | 1.18E-36 |
| PA4127  | <i>hpcG</i>    | -7.89104225 | 4.28E-08 |
| PA0798  | <i>pmtA</i>    | -7.89711123 | 1.01E-45 |
| PA0918  | <i>PA0918</i>  | -7.90389385 | 3.41E-73 |
| PA2302  | <i>ambE</i>    | -7.95650915 | 7.7E-62  |
| PA4301  | <i>tadB</i>    | -8.0857842  | 4.58E-14 |
| PA0208  | <i>mdcA</i>    | -8.12566064 | 2.01E-29 |
| PA3009  | <i>PA3009</i>  | -8.12671105 | 6E-122   |
| PA1258  | <i>PA1258</i>  | -8.2773451  | 1.82E-06 |
| PA2746a | <i>PA2746a</i> | -8.28003205 | 5.4E-111 |
| PA1873  | <i>PA1873</i>  | -8.32407718 | 2.18E-20 |
| PA2919  | <i>PA2919</i>  | -8.33300477 | 2.92E-21 |
| PA0215  | <i>PA0215</i>  | -8.34473633 | 1.35E-34 |
| PA2862  | <i>lipA</i>    | -8.38604734 | 2.47E-19 |



|          |                |             |          |
|----------|----------------|-------------|----------|
| PA4084   | <i>cupB3</i>   | -8.49541491 | 5.36E-05 |
| PA2340   | <i>PA2340</i>  | -8.54506505 | 2.7E-12  |
| PA2815   | <i>PA2815</i>  | -8.59280065 | 5.3E-129 |
| PA2569   | <i>PA2569</i>  | -8.62879786 | 6.92E-43 |
| PA2701   | <i>PA2701</i>  | -8.63589104 | 8.66E-09 |
| PA4888   | <i>desB</i>    | -8.63693826 | 4.04E-09 |
| PA3629   | <i>adhC</i>    | -8.73432735 | 7.4E-154 |
| PA0288   | <i>gpuA</i>    | -8.79108147 | 2.7E-12  |
| PA4653   | <i>PA4653</i>  | -8.80689338 | 3.63E-29 |
| PA3289   | <i>PA3289</i>  | -8.81303837 | 4.07E-98 |
| PA4500   | <i>PA4500</i>  | -8.81800598 | 9.2E-150 |
| PA4015   | <i>PA4015</i>  | -8.84877004 | 2.9E-178 |
| PA0028   | <i>PA0028</i>  | -8.85137688 | 1.1E-89  |
| PA4132   | <i>PA4132</i>  | -8.85926858 | 2.4E-131 |
| PA2506   | <i>PA2506</i>  | -8.88570154 | 0.000255 |
| PA2070   | <i>PA2070</i>  | -8.91594906 | 1.23E-06 |
| PA4682   | <i>PA4682</i>  | -8.9181512  | 1.11E-31 |
| PA1166   | <i>PA1166</i>  | -8.95530163 | 2.1E-81  |
| PA0484   | <i>PA0484</i>  | -8.99941972 | 2.5E-159 |
| PA2024   | <i>PA2024</i>  | -9.02313523 | 1.04E-64 |
| PA2604   | <i>PA2604</i>  | -9.03206941 | 0        |
| PA3691   | <i>PA3691</i>  | -9.07728004 | 4.71E-48 |
| PA5366   | <i>pstB</i>    | -9.13687797 | 5.7E-151 |
| PA0451   | <i>PA0451</i>  | -9.14851703 | 1.8E-27  |
| PA5101   | <i>PA5101</i>  | -9.22514771 | 3.2E-19  |
| PA2416   | <i>treA</i>    | -9.30164387 | 7.09E-22 |
| PA0826.2 | <i>ssrA</i>    | -9.31676448 | 0        |
| PA5219   | <i>PA5219</i>  | -9.32999045 | 3.7E-59  |
| PA0674   | <i>vreA</i>    | -9.33522668 | 9.84E-85 |
| PA2331   | <i>PA2331</i>  | -9.39105966 | 1.8E-174 |
| PA2175   | <i>PA2175</i>  | -9.4428462  | 3.24E-15 |
| PA4208   | <i>opmD</i>    | -9.45472766 | 3.62E-26 |
| PA2108   | <i>PA2108</i>  | -9.46209483 | 1.77E-15 |
| PA4108a  | <i>PA4108a</i> | -9.50165709 | 9.17E-11 |
| PA2448   | <i>PA2448</i>  | -9.50340709 | 5.47E-37 |
| PA3460   | <i>PA3460</i>  | -9.5320032  | 3.8E-126 |
| PA4144   | <i>PA4144</i>  | -9.54086965 | 2.02E-07 |
| PA0290   | <i>PA0290</i>  | -9.57151176 | 7.3E-103 |
| PA1837a  | <i>PA1837a</i> | -9.59827941 | 7.71E-88 |
| PA2305   | <i>ambB</i>    | -9.59984555 | 1.79E-60 |
| PA2563   | <i>PA2563</i>  | -9.67098261 | 7.01E-66 |
| PA3038   | <i>PA3038</i>  | -9.67617782 | 3.36E-72 |
| PA0274   | <i>PA0274</i>  | -9.68319346 | 4.07E-07 |

|        |               |             |          |
|--------|---------------|-------------|----------|
| PA1987 | <i>pqqC</i>   | -9.69844648 | 3.44E-19 |
| PA1562 | <i>acnA</i>   | -9.70278044 | 3.7E-160 |
| PA0027 | <i>PA0027</i> | -9.72150402 | 3.5E-123 |
| PA1901 | <i>phzC2</i>  | -9.74049486 | 1.64E-45 |
| PA2485 | <i>PA2485</i> | -9.75260616 | 1.5E-50  |
| PA3205 | <i>PA3205</i> | -9.78954564 | 4.6E-160 |
| PA0178 | <i>PA0178</i> | -9.81718602 | 3.67E-70 |
| PA2370 | <i>PA2370</i> | -9.9079727  | 1.05E-27 |
| PA0036 | <i>trpB</i>   | -9.91114005 | 1.3E-119 |
| PA4778 | <i>cueR</i>   | -9.96399174 | 3.4E-116 |
| PA0687 | <i>PA0687</i> | -10.0796242 | 1.42E-09 |
| PA2544 | <i>PA2544</i> | -10.1207897 | 2.7E-159 |
| PA2071 | <i>fusA2</i>  | -10.1304087 | 3E-144   |
| PA0112 | <i>PA0112</i> | -10.1550904 | 1.25E-10 |
| PA3554 | <i>arnA</i>   | -10.214782  | 8.1E-70  |
| PA0523 | <i>norC</i>   | -10.2376522 | 4.69E-17 |
| PA3921 | <i>PA3921</i> | -10.2380959 | 1.32E-84 |
| PA3628 | <i>PA3628</i> | -10.2468301 | 2.5E-133 |
| PA3712 | <i>PA3712</i> | -10.2763167 | 6.7E-149 |
| PA1431 | <i>rsaL</i>   | -10.2772645 | 4.75E-67 |
| PA2168 | <i>PA2168</i> | -10.329473  | 7.54E-18 |
| PA4652 | <i>PA4652</i> | -10.3452452 | 5.61E-16 |
| PA1254 | <i>PA1254</i> | -10.346892  | 6.51E-23 |
| PA2188 | <i>PA2188</i> | -10.3882908 | 6.63E-15 |
| PA2571 | <i>PA2571</i> | -10.3933542 | 2.36E-72 |
| PA2552 | <i>PA2552</i> | -10.4284142 | 1.79E-77 |
| PA0108 | <i>collI</i>  | -10.4460881 | 5.55E-88 |
| PA3904 | <i>PA3904</i> | -10.5176681 | 4.9E-129 |
| PA3792 | <i>leuA</i>   | -10.5364868 | 0        |
| PA2363 | <i>PA2363</i> | -10.5943831 | 9.2E-54  |
| PA5359 | <i>PA5359</i> | -10.806456  | 3.3E-191 |
| PA4022 | <i>PA4022</i> | -10.8199862 | 2.31E-68 |
| PA0673 | <i>PA0673</i> | -10.8307507 | 1.3E-176 |
| PA2721 | <i>PA2721</i> | -10.8378287 | 2.62E-76 |
| PA2065 | <i>pcoA</i>   | -10.8684606 | 5.84E-12 |
| PA4607 | <i>PA4607</i> | -10.958344  | 1.4E-184 |
| PA5212 | <i>PA5212</i> | -11.0741061 | 3.2E-171 |
| PA3415 | <i>PA3415</i> | -11.1079725 | 5.26E-41 |
| PA0483 | <i>PA0483</i> | -11.1883323 | 8.2E-118 |
| PA1135 | <i>PA1135</i> | -11.2220698 | 1.8E-112 |
| PA3535 | <i>PA3535</i> | -11.2450445 | 4.05E-50 |
| PA4134 | <i>PA4134</i> | -11.2828704 | 2.7E-139 |
| PA1728 | <i>PA1728</i> | -11.3620416 | 4.8E-164 |

|         |                |             |          |
|---------|----------------|-------------|----------|
| PA3251  | <i>PA3251</i>  | -11.4004044 | 2.61E-17 |
| PA3692  | <i>lptF</i>    | -11.4205517 | 1.22E-47 |
| PA0585  | <i>PA0585</i>  | -11.5845575 | 2.08E-32 |
| PA0866  | <i>aroP2</i>   | -11.5850649 | 1.49E-80 |
| PA4788  | <i>PA4788</i>  | -11.6026387 | 2.47E-35 |
| PA1732  | <i>PA1732</i>  | -11.6074936 | 7E-111   |
| PA2156  | <i>PA2156</i>  | -11.6569285 | 4.14E-14 |
| PA5365  | <i>phoU</i>    | -11.7848118 | 3.2E-139 |
| PA2808  | <i>ptrA</i>    | -11.8124263 | 3.65E-25 |
| PA2918  | <i>PA2918</i>  | -11.8522977 | 9.1E-125 |
| PA2381  | <i>PA2381</i>  | -11.8638539 | 1.9E-136 |
| PA0776  | <i>PA0776</i>  | -11.9837596 | 3.49E-39 |
| PA0921  | <i>PA0921</i>  | -12.0184925 | 7.7E-121 |
| PA1932  | <i>PA1932</i>  | -12.0477752 | 7.12E-33 |
| PA0038  | <i>PA0038</i>  | -12.0740715 | 2.6E-180 |
| PA2486  | <i>PA2486</i>  | -12.1051987 | 5.32E-42 |
| PA4877  | <i>PA4877</i>  | -12.146174  | 6E-110   |
| PA3733a | <i>PA3733a</i> | -12.1960644 | 6.7E-158 |
| PA1730  | <i>PA1730</i>  | -12.2260329 | 5.17E-76 |
| PA2573  | <i>PA2573</i>  | -12.236445  | 6.2E-153 |
| PA2303  | <i>ambD</i>    | -12.2438238 | 1.82E-92 |
| PA5057  | <i>phaD</i>    | -12.2700487 | 3E-121   |
| PA3325  | <i>PA3325</i>  | -12.3023817 | 1.11E-52 |
| PA2722  | <i>PA2722</i>  | -12.4142613 | 2.08E-50 |
| PA1745  | <i>PA1745</i>  | -12.4620908 | 4.16E-85 |
| PA5348  | <i>PA5348</i>  | -12.5545322 | 2.9E-230 |
| PA4635a | <i>PA4635a</i> | -12.5711715 | 5.93E-34 |
| PA0176  | <i>aer2</i>    | -12.6123797 | 2.2E-113 |
| PA1860  | <i>PA1860</i>  | -12.6292913 | 1.41E-78 |
| PA1252  | <i>PA1252</i>  | -12.634626  | 2.17E-56 |
| PA1931  | <i>PA1931</i>  | -12.6544402 | 4.37E-59 |
| PA5368  | <i>pstC</i>    | -12.7049381 | 1.6E-122 |
| PA0841  | <i>PA0841</i>  | -12.7105565 | 5.21E-93 |
| PA3477  | <i>rhIR</i>    | -12.7215296 | 0        |
| PA2419  | <i>PA2419</i>  | -12.7306659 | 4.71E-64 |
| PA2176  | <i>PA2176</i>  | -12.8813195 | 3.62E-22 |
| PA3362  | <i>PA3362</i>  | -12.9567828 | 1.2E-106 |
| PA2304  | <i>ambC</i>    | -13.0023776 | 2.43E-93 |
| PA2750a | <i>PA2750a</i> | -13.0695746 | 1.7E-162 |
| PA4214  | <i>phzE1</i>   | -13.0979427 | 5.55E-42 |
| PA1733  | <i>PA1733</i>  | -13.2397625 | 3.6E-123 |
| PA1255  | <i>PA1255</i>  | -13.2571455 | 2.05E-21 |
| PA4303  | <i>tadZ</i>    | -13.2891524 | 1.01E-25 |

|           |               |             |          |
|-----------|---------------|-------------|----------|
| PA2554    | <i>PA2554</i> | -13.3692523 | 2.05E-52 |
| PA0355    | <i>pfpl</i>   | -13.4086854 | 2.8E-122 |
| PA3417    | <i>PA3417</i> | -13.4579711 | 2.66E-40 |
| PA4781    | <i>PA4781</i> | -13.6755632 | 1.79E-75 |
| PA4171    | <i>PA4171</i> | -13.6908949 | 3.5E-118 |
| PA1986    | <i>pqqB</i>   | -13.7340081 | 2.15E-60 |
| PA3461    | <i>PA3461</i> | -13.8289746 | 1.6E-107 |
| PA2574    | <i>alkB1</i>  | -13.8600439 | 3.38E-18 |
| PA4305    | <i>rcpC</i>   | -13.8799262 | 1.97E-81 |
| PA2423    | <i>PA2423</i> | -13.9685861 | 2.5E-139 |
| PA0211    | <i>mdcD</i>   | -14.0592582 | 4.32E-72 |
| PA0212    | <i>mdcE</i>   | -14.062925  | 2.97E-61 |
| PA1172    | <i>napC</i>   | -14.1927461 | 1.3E-129 |
| PA3374    | <i>PA3374</i> | -14.2664706 | 7.6E-140 |
| PA1881    | <i>PA1881</i> | -14.2778255 | 3.5E-111 |
| PA5367    | <i>pstA</i>   | -14.3607485 | 7.8E-160 |
| PA2587    | <i>pqsH</i>   | -14.3927422 | 3.3E-157 |
| PA3347    | <i>PA3347</i> | -14.4185759 | 6.4E-236 |
| PA3585    | <i>glpM</i>   | -14.4531637 | 3.6E-134 |
| PA0685    | <i>PA0685</i> | -14.4603329 | 3.23E-34 |
| PA4573    | <i>PA4573</i> | -14.521291  | 2.8E-139 |
| PA1351    | <i>PA1351</i> | -14.6141505 | 2.99E-15 |
| PA2017    | <i>PA2017</i> | -14.6436179 | 1.5E-110 |
| PA2591    | <i>PA2591</i> | -14.6453388 | 8.9E-109 |
| PA3368    | <i>PA3368</i> | -14.6983192 | 1.44E-67 |
| PA2341    | <i>PA2341</i> | -14.7876498 | 6.59E-17 |
| PA0567    | <i>PA0567</i> | -14.7951887 | 9.6E-118 |
| PA1256    | <i>PA1256</i> | -14.8051988 | 2.98E-26 |
| PA2622    | <i>cspD</i>   | -14.8734118 | 2.8E-236 |
| PA2145    | <i>PA2145</i> | -14.9363743 | 1.27E-22 |
| PA0026    | <i>plcB</i>   | -14.9834194 | 9.8E-163 |
| PA2747    | <i>PA2747</i> | -14.985193  | 5.62E-36 |
| PA2072    | <i>PA2072</i> | -14.9916028 | 1.01E-34 |
| PA4304    | <i>rcpA</i>   | -15.0462089 | 3.48E-42 |
| PA4172    | <i>PA4172</i> | -15.1768274 | 9.8E-33  |
| PA2179    | <i>PA2179</i> | -15.2886764 | 1.08E-25 |
| PA2592    | <i>PA2592</i> | -15.5036673 | 4.2E-158 |
| PA5178    | <i>PA5178</i> | -15.5300013 | 0        |
| PA4625    | <i>PA4625</i> | -15.6572623 | 7.6E-80  |
| PA4726.11 | <i>crcZ</i>   | -15.6606857 | 0        |
| PA0175    | <i>PA0175</i> | -15.7219559 | 1.88E-38 |
| PA4702    | <i>PA4702</i> | -15.7804428 | 4.7E-145 |
| PA4311    | <i>PA4311</i> | -15.9043343 | 3.9E-107 |

|        |               |             |          |
|--------|---------------|-------------|----------|
| PA0174 | <i>PA0174</i> | -15.9489108 | 1E-10    |
| PA1041 | <i>PA1041</i> | -15.9500478 | 4.6E-167 |
| PA5220 | <i>PA5220</i> | -16.0945382 | 3.6E-165 |
| PA2162 | <i>PA2162</i> | -16.1459484 | 2.71E-52 |
| PA0587 | <i>PA0587</i> | -16.1964815 | 2.1E-146 |
| PA4590 | <i>pra</i>    | -16.2831212 | 4.31E-83 |
| PA4143 | <i>PA4143</i> | -16.2966275 | 1.58E-20 |
| PA2144 | <i>glgP</i>   | -16.3378362 | 1.8E-100 |
| PA4880 | <i>PA4880</i> | -16.4969696 | 1.1E-131 |
| PA0696 | <i>PA0696</i> | -16.5991508 | 1.33E-31 |
| PA2572 | <i>PA2572</i> | -16.6269832 | 5E-110   |
| PA0586 | <i>PA0586</i> | -16.6409357 | 6.8E-132 |
| PA2250 | <i>lpdV</i>   | -16.6755698 | 2.1E-126 |
| PA1905 | <i>phzG2</i>  | -16.7153536 | 7.44E-91 |
| PA1880 | <i>PA1880</i> | -16.8301022 | 2.9E-123 |
| PA4876 | <i>osmE</i>   | -16.9421136 | 2.4E-213 |
| PA0675 | <i>vrel</i>   | -16.9650968 | 5.64E-50 |
| PA1356 | <i>PA1356</i> | -16.990994  | 5.94E-40 |
| PA0698 | <i>PA0698</i> | -17.0500326 | 5.29E-41 |
| PA2371 | <i>PA2371</i> | -17.3217254 | 5.29E-52 |
| PA2699 | <i>PA2699</i> | -17.334406  | 1.18E-27 |
| PA1323 | <i>PA1323</i> | -17.3516632 | 9.9E-176 |
| PA0981 | <i>PA0981</i> | -17.3820443 | 4.1E-120 |
| PA2362 | <i>PA2362</i> | -17.3939694 | 2.1E-13  |
| PA1354 | <i>PA1354</i> | -17.443464  | 2.9E-70  |
| PA2109 | <i>PA2109</i> | -17.4943844 | 1.42E-18 |
| PA2185 | <i>katN</i>   | -17.5037151 | 3.17E-67 |
| PA1898 | <i>qscR</i>   | -17.5062669 | 2.54E-37 |
| PA1259 | <i>PA1259</i> | -17.5719614 | 8.57E-39 |
| PA3326 | <i>PA3326</i> | -17.7069854 | 0        |
| PA4925 | <i>PA4925</i> | -17.7084149 | 5.95E-91 |
| PA5059 | <i>PA5059</i> | -17.7101016 | 3.4E-121 |
| PA0684 | <i>PA0684</i> | -17.9943221 | 8.97E-23 |
| PA3416 | <i>PA3416</i> | -18.0139902 | 6.73E-52 |
| PA1176 | <i>napF</i>   | -18.0888952 | 4.36E-70 |
| PA3623 | <i>PA3623</i> | -18.212054  | 4.8E-295 |
| PA2048 | <i>PA2048</i> | -18.2351931 | 5.7E-105 |
| PA4142 | <i>PA4142</i> | -18.2487205 | 3.71E-73 |
| PA0677 | <i>PA0677</i> | -18.4813492 | 1.78E-87 |
| PA0865 | <i>hpd</i>    | -18.5099094 | 1.6E-141 |
| PA3369 | <i>PA3369</i> | -18.7566228 | 7.2E-156 |
| PA3688 | <i>PA3688</i> | -18.8400553 | 1.7E-168 |
| PA2107 | <i>PA2107</i> | -18.8859974 | 3.62E-10 |

|        |               |             |          |
|--------|---------------|-------------|----------|
| PA3049 | <i>rmf</i>    | -18.933321  | 0        |
| PA0588 | <i>PA0588</i> | -19.0312298 | 1.53E-68 |
| PA4215 | <i>phzF1</i>  | -19.1521057 | 2.07E-46 |
| PA1903 | <i>phzE2</i>  | -19.1598249 | 8.46E-48 |
| PA0681 | <i>PA0681</i> | -19.2411436 | 9.61E-73 |
| PA0103 | <i>PA0103</i> | -19.2930087 | 1.6E-132 |
| PA3363 | <i>amiR</i>   | -19.3727672 | 6.2E-141 |
| PA1904 | <i>phzF2</i>  | -19.4380781 | 1.38E-51 |
| PA0105 | <i>coxB</i>   | -19.444576  | 6.7E-133 |
| PA4913 | <i>PA4913</i> | -19.4552893 | 1.88E-72 |
| PA0110 | <i>PA0110</i> | -19.4878463 | 6.25E-22 |
| PA0109 | <i>PA0109</i> | -19.4920091 | 7.2E-111 |
| PA1899 | <i>phzA2</i>  | -19.5365415 | 2.74E-35 |
| PA4294 | <i>PA4294</i> | -19.6394019 | 5.57E-81 |
| PA0102 | <i>PA0102</i> | -19.6488115 | 0        |
| PA2636 | <i>PA2636</i> | -19.9084082 | 1.2E-38  |
| PA2247 | <i>bkdA1</i>  | -20.2916817 | 1.6E-143 |
| PA0683 | <i>PA0683</i> | -20.4129288 | 6.5E-44  |
| PA3274 | <i>PA3274</i> | -20.578773  | 5.2E-143 |
| PA2369 | <i>PA2369</i> | -20.7181329 | 8.56E-65 |
| PA2135 | <i>PA2135</i> | -20.7520381 | 5.25E-11 |
| PA1350 | <i>PA1350</i> | -20.7862793 | 1.96E-58 |
| PA0209 | <i>PA0209</i> | -20.7936112 | 5.45E-21 |
| PA3418 | <i>ldh</i>    | -21.0234751 | 3.6E-150 |
| PA4297 | <i>tadG</i>   | -21.7523019 | 1.01E-86 |
| PA4290 | <i>PA4290</i> | -21.7886588 | 2.45E-63 |
| PA4377 | <i>PA4377</i> | -21.9284293 | 1.6E-190 |
| PA0699 | <i>PA0699</i> | -21.9403239 | 8.79E-31 |
| PA0679 | <i>PA0679</i> | -21.9694756 | 3.8E-106 |
| PA2167 | <i>PA2167</i> | -22.247947  | 6.77E-49 |
| PA2248 | <i>bkdA2</i>  | -22.3645609 | 2.5E-122 |
| PA2249 | <i>bkdB</i>   | -22.5656746 | 1.5E-110 |
| PA2157 | <i>PA2157</i> | -22.6009697 | 2.83E-41 |
| PA2181 | <i>PA2181</i> | -22.6666779 | 7.67E-22 |
| PA3371 | <i>PA3371</i> | -23.0115969 | 4.9E-194 |
| PA3569 | <i>mmsB</i>   | -23.0614761 | 2.15E-79 |
| PA0107 | <i>PA0107</i> | -23.0911182 | 4.15E-62 |
| PA4295 | <i>fppA</i>   | -23.2526031 | 1.84E-11 |
| PA3364 | <i>amiC</i>   | -23.5235165 | 1.51E-88 |
| PA1053 | <i>PA1053</i> | -23.6970109 | 0        |
| PA5100 | <i>hutU</i>   | -23.8809004 | 2E-119   |
| PA4302 | <i>tadA</i>   | -24.0024601 | 4.49E-40 |
| PA4296 | <i>pprB</i>   | -24.0135136 | 7.1E-170 |

|         |                |             |          |
|---------|----------------|-------------|----------|
| PA2746  | <i>PA2746</i>  | -24.086409  | 1E-173   |
| PA2588  | <i>PA2588</i>  | -24.1845013 | 2.5E-129 |
| PA4649  | <i>PA4649</i>  | -24.3090248 | 1.19E-60 |
| PA0177  | <i>PA0177</i>  | -24.723513  | 1.1E-79  |
| PA2142  | <i>PA2142</i>  | -24.8034586 | 5.79E-46 |
| PA1902  | <i>phzD2</i>   | -24.8073082 | 7.26E-64 |
| PA5056  | <i>phaC1</i>   | -24.8901972 | 1.7E-145 |
| PA0059  | <i>osmC</i>    | -25.0593529 | 3.4E-159 |
| PA3234  | <i>PA3234</i>  | -25.1585727 | 3.4E-128 |
| PA0692  | <i>PA0692</i>  | -25.2626294 | 5.21E-33 |
| PA4299  | <i>tadD</i>    | -25.6786854 | 6.52E-29 |
| PA1173  | <i>napB</i>    | -25.9985633 | 2.33E-77 |
| PA0887  | <i>acsA</i>    | -26.0632234 | 2.2E-146 |
| PA3734  | <i>PA3734</i>  | -26.4438848 | 4.6E-120 |
| PA0106  | <i>coxA</i>    | -26.4631844 | 1.43E-92 |
| PA0214  | <i>PA0214</i>  | -26.6865191 | 7.59E-30 |
| PA3622  | <i>rpoS</i>    | -26.7863477 | 0        |
| PA2139  | <i>PA2139</i>  | -26.8228417 | 1.05E-34 |
| PA4128  | <i>PA4128</i>  | -26.8646157 | 1.54E-36 |
| PA2138  | <i>PA2138</i>  | -27.0472455 | 5.29E-58 |
| PA2022  | <i>PA2022</i>  | -27.0589835 | 5.3E-119 |
| PA0347  | <i>glpQ</i>    | -27.0623997 | 1.9E-70  |
| PA1130  | <i>rhIC</i>    | -27.4854415 | 6.4E-171 |
| PA2418  | <i>PA2418</i>  | -27.517184  | 6.64E-44 |
| PA3476  | <i>rhII</i>    | -27.8460691 | 3.4E-186 |
| PA4078  | <i>PA4078</i>  | -27.8522836 | 1.79E-81 |
| PA0680  | <i>PA0680</i>  | -28.3327616 | 5.86E-41 |
| PA2160  | <i>PA2160</i>  | -28.974149  | 7.4E-152 |
| PA0695  | <i>PA0695</i>  | -29.0393261 | 1E-32    |
| PA2763a | <i>PA2763a</i> | -29.1734499 | 1.8E-99  |
| PA3986  | <i>PA3986</i>  | -29.2494231 | 9.6E-155 |
| PA0978  | <i>PA0978</i>  | -29.3896848 | 2E-117   |
| PA3723  | <i>PA3723</i>  | -29.7410781 | 2.2E-169 |
| PA2173a | <i>PA2173a</i> | -29.8294721 | 1.8E-120 |
| PA3032  | <i>snr1</i>    | -29.8687377 | 7.15E-92 |
| PA5481  | <i>PA5481</i>  | -29.8897119 | 3.4E-191 |
| PA4131  | <i>PA4131</i>  | -29.9355487 | 1.3E-153 |
| PA2192  | <i>PA2192</i>  | -30.1041251 | 8.13E-22 |
| PA2152  | <i>PA2152</i>  | -30.707606  | 1.57E-83 |
| PA2190  | <i>PA2190</i>  | -30.8671131 | 7.1E-194 |
| PA0691  | <i>PA0691</i>  | -30.8717647 | 1.95E-32 |
| PA1870  | <i>PA1870</i>  | -31.3410611 | 3.9E-104 |
| PA2187  | <i>PA2187</i>  | -31.4589572 | 8E-39    |

|        |               |             |          |
|--------|---------------|-------------|----------|
| PA2565 | <i>PA2565</i> | -31.6309138 | 1.64E-89 |
| PA1175 | <i>napD</i>   | -32.4638659 | 1.1E-125 |
| PA2564 | <i>PA2564</i> | -32.6890862 | 2.4E-205 |
| PA1930 | <i>PA1930</i> | -33.2320423 | 1.5E-102 |
| PA3370 | <i>PA3370</i> | -33.4437209 | 8.85E-63 |
| PA1606 | <i>PA1606</i> | -33.6633883 | 2.2E-152 |
| PA2375 | <i>PA2375</i> | -33.7410652 | 4.06E-95 |
| PA2112 | <i>PA2112</i> | -34.6501333 | 1.12E-07 |
| PA1324 | <i>PA1324</i> | -34.790315  | 1.3E-259 |
| PA1869 | <i>PA1869</i> | -35.3842207 | 7.1E-206 |
| PA0686 | <i>PA0686</i> | -35.6496455 | 5.06E-36 |
| PA1180 | <i>phoQ</i>   | -35.9455442 | 1.3E-175 |
| PA3519 | <i>PA3519</i> | -37.1221101 | 2.33E-16 |
| PA2880 | <i>PA2880</i> | -37.2350436 | 3.1E-130 |
| PA0852 | <i>cbpD</i>   | -37.303509  | 0        |
| PA2153 | <i>glgB</i>   | -37.4472328 | 5.43E-79 |
| PA2164 | <i>PA2164</i> | -38.1501311 | 8.9E-104 |
| PA2137 | <i>PA2137</i> | -38.481675  | 6.02E-70 |
| PA1344 | <i>PA1344</i> | -38.5038716 | 1.4E-214 |
| PA2178 | <i>PA2178</i> | -38.8655341 | 2.34E-38 |
| PA2165 | <i>PA2165</i> | -39.2057588 | 2.6E-133 |
| PA5058 | <i>phaC2</i>  | -39.3118334 | 1.3E-148 |
| PA1404 | <i>PA1404</i> | -39.6732444 | 5.9E-144 |
| PA3924 | <i>PA3924</i> | -39.9894817 | 3.2E-113 |
| PA2882 | <i>PA2882</i> | -40.0601282 | 4.3E-125 |
| PA0730 | <i>PA0730</i> | -40.151262  | 3E-226   |
| PA5482 | <i>PA5482</i> | -40.4463082 | 1.97E-14 |
| PA4350 | <i>PA4350</i> | -41.0595002 | 4.3E-306 |
| PA3366 | <i>amiE</i>   | -41.4965995 | 2.98E-65 |
| PA4209 | <i>phzM</i>   | -41.5791151 | 1.8E-163 |
| PA0111 | <i>PA0111</i> | -41.9751957 | 7.81E-32 |
| PA0682 | <i>PA0682</i> | -42.4936184 | 1.07E-38 |
| PA2433 | <i>PA2433</i> | -42.7536171 | 4.8E-213 |
| PA1177 | <i>napE</i>   | -42.9173196 | 3.5E-124 |
| PA2154 | <i>PA2154</i> | -43.0474149 | 3.75E-24 |
| PA3586 | <i>PA3586</i> | -43.4237726 | 3E-138   |
| PA4130 | <i>PA4130</i> | -43.8943332 | 7.4E-112 |
| PA0844 | <i>plcH</i>   | -44.3303444 | 5.65E-94 |
| PA1784 | <i>PA1784</i> | -44.4090911 | 2.9E-123 |
| PA2367 | <i>PA2367</i> | -45.2044556 | 6.8E-122 |
| PA1327 | <i>PA1327</i> | -45.387794  | 1E-193   |
| PA2155 | <i>PA2155</i> | -45.438941  | 1.34E-28 |
| PA0843 | <i>plcR</i>   | -45.5669513 | 1.4E-139 |



|        |               |             |          |
|--------|---------------|-------------|----------|
| PA1914 | <i>PA1914</i> | -47.1491713 | 3.04E-96 |
| PA3553 | <i>arnC</i>   | -47.4112859 | 8.1E-182 |
| PA2173 | <i>PA2173</i> | -47.6364385 | 5.7E-131 |
| PA5369 | <i>pstS</i>   | -47.9848386 | 0        |
| PA2589 | <i>PA2589</i> | -48.4113275 | 9.87E-47 |
| PA0688 | <i>PA0688</i> | -49.1220283 | 2.2E-197 |
| PA2158 | <i>PA2158</i> | -49.7796336 | 1.2E-80  |
| PA0740 | <i>sdsA1</i>  | -49.8569551 | 2.2E-119 |
| PA4133 | <i>PA4133</i> | -50.1455121 | 3.1E-155 |
| PA0188 | <i>PA0188</i> | -50.880821  | 1.13E-69 |
| PA1876 | <i>PA1876</i> | -51.3318484 | 4.5E-140 |
| PA2066 | <i>PA2066</i> | -51.6874152 | 1.7E-127 |
| PA2366 | <i>PA2366</i> | -52.2226147 | 1.7E-155 |
| PA2030 | <i>PA2030</i> | -52.2853764 | 7.5E-186 |
| PA1174 | <i>napA</i>   | -52.5699512 | 1.6E-106 |
| PA3250 | <i>PA3250</i> | -52.6729066 | 3E-150   |
| PA2151 | <i>PA2151</i> | -52.8127554 | 6.1E-116 |
| PA0842 | <i>PA0842</i> | -52.8469284 | 4.1E-120 |
| PA3375 | <i>PA3375</i> | -52.8811372 | 2.22E-84 |
| PA4703 | <i>PA4703</i> | -54.2486353 | 2E-117   |
| PA2150 | <i>PA2150</i> | -54.8183664 | 9.89E-61 |
| PA0697 | <i>PA0697</i> | -55.351953  | 2.51E-47 |
| PA3231 | <i>PA3231</i> | -56.014864  | 5.2E-103 |
| PA4213 | <i>phzD1</i>  | -56.0463037 | 1.38E-67 |
| PA3235 | <i>PA3235</i> | -56.6053945 | 6.4E-200 |
| PA4651 | <i>PA4651</i> | -56.6060098 | 7.3E-114 |
| PA4739 | <i>PA4739</i> | -56.9056109 | 0        |
| PA1900 | <i>phzB2</i>  | -56.9809444 | 4.7E-127 |
| PA3377 | <i>PA3377</i> | -57.0583958 | 1.9E-141 |
| PA0210 | <i>mdcC</i>   | -58.4370082 | 4.55E-44 |
| PA2163 | <i>PA2163</i> | -59.6136875 | 3.6E-62  |
| PA3451 | <i>PA3451</i> | -59.8637367 | 5.6E-182 |
| PA2803 | <i>PA2803</i> | -60.3225468 | 4.6E-117 |
| PA1871 | <i>lasA</i>   | -61.2806563 | 1.4E-220 |
| PA2696 | <i>PA2696</i> | -61.3306899 | 8.6E-112 |
| PA2937 | <i>PA2937</i> | -61.6413619 | 3.2E-133 |
| PA1875 | <i>PA1875</i> | -62.0698499 | 1.5E-168 |
| PA2717 | <i>cpo</i>    | -62.8892151 | 8.9E-167 |
| PA2881 | <i>PA2881</i> | -64.2268583 | 4E-159   |
| PA3384 | <i>phnC</i>   | -64.686766  | 1.4E-112 |
| PA4141 | <i>PA4141</i> | -64.82751   | 0        |
| PA2172 | <i>PA2172</i> | -65.2111507 | 5.2E-134 |
| PA2428 | <i>PA2428</i> | -65.8301087 | 7.7E-148 |

|         |                |             |          |
|---------|----------------|-------------|----------|
| PA2182  | <i>PA2182</i>  | -66.3216189 | 3.53E-77 |
| PA0693  | <i>exbB2</i>   | -67.318961  | 2.87E-42 |
| PA3365  | <i>PA3365</i>  | -67.7834537 | 7.2E-131 |
| PA2365  | <i>PA2365</i>  | -68.7371383 | 2.3E-157 |
| PA2148  | <i>PA2148</i>  | -69.7054898 | 2.17E-52 |
| PA3923  | <i>PA3923</i>  | -69.7761702 | 9.5E-182 |
| PA0051  | <i>phzH</i>    | -71.1812334 | 2.6E-176 |
| PA1179  | <i>phoP</i>    | -71.9870493 | 0        |
| PA1349  | <i>PA1349</i>  | -72.373771  | 1.04E-49 |
| PA1353  | <i>PA1353</i>  | -72.6642204 | 7.5E-140 |
| PA4129  | <i>PA4129</i>  | -72.9614707 | 2.8E-130 |
| PA0122  | <i>PA0122</i>  | -73.7455422 | 0        |
| PA5440a | <i>PA5440a</i> | -73.914279  | 0        |
| PA2184  | <i>PA2184</i>  | -74.5303975 | 1.7E-149 |
| PA2804  | <i>PA2804</i>  | -75.1577208 | 1.9E-194 |
| PA2566  | <i>PA2566</i>  | -75.3125662 | 2.6E-181 |
| PA3378  | <i>PA3378</i>  | -77.3946661 | 7.9E-161 |
| PA3296  | <i>phoA</i>    | -80.3374925 | 2.3E-174 |
| PA1874  | <i>PA1874</i>  | -80.9894933 | 5.3E-235 |
| PA3376  | <i>PA3376</i>  | -88.3015717 | 1.2E-114 |
| PA4738  | <i>PA4738</i>  | -88.8019403 | 1.8E-210 |
| PA3382  | <i>phnE</i>    | -89.6099322 | 5.6E-173 |
| PA0052  | <i>PA0052</i>  | -91.2248618 | 3E-165   |
| PA3922  | <i>PA3922</i>  | -92.4233749 | 6.5E-73  |
| PA1877  | <i>PA1877</i>  | -96.8617272 | 5.9E-118 |
| PA2368  | <i>PA2368</i>  | -97.2321239 | 2.56E-37 |
| PA2159  | <i>PA2159</i>  | -100.10995  | 6E-144   |
| PA3381  | <i>PA3381</i>  | -101.437707 | 2.3E-122 |
| PA3380  | <i>PA3380</i>  | -101.762421 | 4.4E-157 |
| PA2174  | <i>PA2174</i>  | -102.053478 | 1.7E-212 |
| PA4211  | <i>phzB1</i>   | -107.969811 | 1.9E-111 |
| PA2300  | <i>chiC</i>    | -109.430884 | 1.2E-225 |
| PA3478  | <i>rhlB</i>    | -110.288241 | 0        |
| PA2147  | <i>katE</i>    | -110.68223  | 1.1E-147 |
| PA5460  | <i>PA5460</i>  | -116.384764 | 9.7E-227 |
| PA2939  | <i>PA2939</i>  | -120.000803 | 0        |
| PA2166  | <i>PA2166</i>  | -120.695742 | 0        |
| PA3319  | <i>plcN</i>    | -124.635885 | 4.4E-216 |
| PA1131  | <i>PA1131</i>  | -127.938569 | 2E-113   |
| PA0678  | <i>PA0678</i>  | -129.410347 | 2.86E-73 |
| PA2067  | <i>PA2067</i>  | -133.53102  | 2.4E-175 |
| PA2027  | <i>PA2027</i>  | -134.134205 | 0        |
| PA3361  | <i>lecB</i>    | -136.085973 | 1.33E-81 |

|         |                |             |          |
|---------|----------------|-------------|----------|
| PA0187  | <i>PA0187</i>  | -141.73338  | 6.7E-120 |
| PA2134  | <i>PA2134</i>  | -144.547219 | 5.5E-172 |
| PA3520  | <i>PA3520</i>  | -146.627754 | 4.5E-271 |
| PA4648  | <i>PA4648</i>  | -146.735832 | 1.5E-167 |
| PA3552  | <i>arnB</i>    | -147.440079 | 0        |
| PA1571  | <i>PA1571</i>  | -151.107834 | 0        |
| PA3724  | <i>lasB</i>    | -154.297024 | 0        |
| PA2031  | <i>PA2031</i>  | -163.224616 | 4.1E-127 |
| PA3280  | <i>oprO</i>    | -163.967998 | 0        |
| PA2635  | <i>PA2635</i>  | -165.754942 | 1.5E-291 |
| PA2068  | <i>PA2068</i>  | -170.057393 | 4.2E-185 |
| PA0979  | <i>PA0979</i>  | -177.993265 | 1.7E-184 |
| PA1178  | <i>oprH</i>    | -178.614928 | 0        |
| PA4306  | <i>flp</i>     | -183.668609 | 3.3E-280 |
| PA1343  | <i>PA1343</i>  | -205.189047 | 2.1E-139 |
| PA3219  | <i>PA3219</i>  | -206.537471 | 2.7E-172 |
| PA3383  | <i>PA3383</i>  | -206.887194 | 3.03E-77 |
| PA3910  | <i>eddA</i>    | -208.653961 | 3.47E-80 |
| PA1260  | <i>PA1260</i>  | -220.212167 | 2.4E-169 |
| PA2069  | <i>PA2069</i>  | -225.929314 | 1.2E-267 |
| PA3909  | <i>eddB</i>    | -227.185866 | 0        |
| PA2171  | <i>PA2171</i>  | -253.423828 | 3.7E-211 |
| PA2146  | <i>PA2146</i>  | -257.92613  | 0        |
| PA3479  | <i>rhIA</i>    | -258.133699 | 0        |
| PA2143  | <i>PA2143</i>  | -277.058589 | 7.4E-118 |
| PA2180  | <i>PA2180</i>  | -292.746255 | 3.69E-83 |
| PA4637a | <i>PA4637a</i> | -345.842164 | 0        |
| PA3379  | <i>PA3379</i>  | -400.722857 | 7.8E-154 |
| PA2169  | <i>PA2169</i>  | -413.182363 | 1.1E-138 |
| PA2570  | <i>lecA</i>    | -513.51683  | 0        |

**Table S2: Changes in bacterial gene expression associated with outer membrane vesicle localization in response to infection measured by RNA-seq.** Fold changes greater than 1 indicate that the gene was up-regulated in *P. aeruginosa* infected mice compared to non-infected mice. Fold changes inferior to -1 indicate that the gene was down-regulated in *P. aeruginosa* infected mice compared to non-infected mice. This table includes genes which products were predicted or experimentally shown to be associated with outer membrane vesicles.

| <b>Locus</b> | <b>Gene</b> | <b>Fold change</b> | <b>P-value</b> |
|--------------|-------------|--------------------|----------------|
| PA4489       | PA4489      | 2.37               | 9.97E-10       |
| PA4491       | PA4491      | 1.78               | 0.000278       |
| PA3821       | secD        | 5.05               | 1.8E-159       |
| PA5560       | atpB        | 3.26               | 1.71E-96       |
| PA0768       | lepB        | 3.41               | 3.33E-36       |
| PA5479       | gltP        | 2.80               | 1.42E-32       |
| PA3984       | Int         | 2.79               | 6.99E-14       |
| PA4997       | msbA        | 1.79               | 2.13E-08       |
| PA4700       | mrcB        | 2.02               | 2.44E-07       |
| PA5291       | PA5291      | 1.64               | 0.000225       |
| PA4461       | PA4461      | 1.91               | 1.54E-14       |
| PA5568       | PA5568      | 6.37               | 3.5E-195       |
| PA3641       | PA3641      | 10.97              | 8.3E-175       |
| PA1805       | ppiD        | 5.16               | 3.8E-171       |
| PA3729       | PA3729      | 6.20               | 3.9E-124       |
| PA2973       | PA2973      | 3.50               | 5.7E-60        |
| PA3147       | wbpJ        | 3.52               | 6.69E-43       |
| PA5558       | atpF        | 8.34               | 1.07E-42       |
| PA5232       | PA5232      | 2.87               | 4.25E-42       |
| PA3822       | PA3822      | 2.40               | 2.31E-41       |
| PA4292       | PA4292      | 2.77               | 7.46E-32       |
| PA4431       | PA4431      | 2.27               | 6.9E-31        |
| PA1584       | sdhB        | 2.15               | 2.36E-30       |
| PA4430       | PA4430      | 2.14               | 1.37E-22       |
| PA4003       | pbpA        | 3.31               | 1.2E-21        |
| PA5304       | dadA        | 2.36               | 1.84E-18       |
| PA5052       | PA5052      | 2.58               | 9.32E-18       |
| PA3875       | narG        | 3.24               | 1.44E-15       |
| PA1583       | sdhA        | 1.80               | 2.71E-14       |
| PA4957       | psd         | 1.98               | 4.17E-13       |
| PA3878       | narX        | 2.66               | 4.08E-11       |
| PA0074       | ppkA        | 3.13               | 3.25E-10       |
| PA2290       | gcd         | 1.82               | 1.97E-09       |
| PA1767       | PA1767      | 1.80               | 4.85E-09       |
| PA0077       | tssM1       | 2.59               | 9.73E-09       |

|        |        |       |          |
|--------|--------|-------|----------|
| PA0375 | ftsX   | 1.85  | 2.87E-08 |
| PA2983 | PA2983 | 1.80  | 9.08E-08 |
| PA0913 | mgtE   | 1.93  | 2.73E-06 |
| PA5065 | ubiB   | 1.81  | 0.000143 |
| PA3838 | PA3838 | 2.25  | 0.000174 |
| PA0080 | tssJ1  | 2.07  | 0.00022  |
| PA4385 | groEL  | 9.38  | 9.66E-60 |
| PA4266 | fusA1  | 5.76  | 8.07E-37 |
| PA0963 | aspS   | 2.31  | 5E-27    |
| PA3001 | PA3001 | 1.94  | 3.74E-25 |
| PA0411 | pilJ   | 3.89  | 9.4E-135 |
| PA5553 | atpC   | 8.51  | 3.1E-212 |
| PA1556 | ccoO2  | 22.06 | 4.4E-206 |
| PA5016 | aceF   | 6.60  | 2E-174   |
| PA0141 | PA0141 | 8.11  | 1.3E-170 |
| PA1596 | htpG   | 10.35 | 1.9E-169 |
| PA0782 | putA   | 5.84  | 3.1E-116 |
| PA5015 | aceE   | 3.53  | 7.83E-95 |
| PA4771 | lldD   | 14.31 | 2.31E-91 |
| PA2976 | rne    | 4.95  | 4.4E-90  |
| PA4568 | rplU   | 3.51  | 1.78E-87 |
| PA4267 | rpsG   | 5.71  | 1.98E-80 |
| PA2840 | PA2840 | 3.81  | 8.62E-80 |
| PA2741 | rplT   | 3.53  | 1.01E-78 |
| PA1585 | sucA   | 3.20  | 1.11E-78 |
| PA1800 | tig    | 2.87  | 3.82E-77 |
| PA3452 | mqaA   | 3.41  | 4.2E-76  |
| PA4262 | rplD   | 12.85 | 4.73E-76 |
| PA1586 | sucB   | 3.36  | 8.91E-76 |
| PA4251 | rplE   | 10.61 | 1.18E-74 |
| PA4432 | rpsI   | 3.66  | 2.49E-72 |
| PA0618 | PA0618 | 6.69  | 7.28E-69 |
| PA4274 | rplK   | 3.49  | 6.99E-68 |
| PA4269 | rpoC   | 6.46  | 3.01E-67 |
| PA4273 | rplA   | 6.19  | 1.27E-65 |
| PA4253 | rplN   | 5.31  | 1.86E-64 |
| PA1589 | sucD   | 5.27  | 1.24E-62 |
| PA3656 | rpsB   | 7.96  | 3.87E-57 |
| PA4257 | rpsC   | 10.95 | 1.43E-55 |
| PA5555 | atpG   | 10.03 | 8.07E-53 |
| PA4745 | nusA   | 2.54  | 3.44E-51 |
| PA4238 | rpoA   | 7.46  | 2.64E-50 |
| PA4240 | rpsK   | 6.95  | 1.66E-49 |

|        |        |       |          |
|--------|--------|-------|----------|
| PA4761 | dnaK   | 10.94 | 1.76E-47 |
| PA4239 | rpsD   | 6.38  | 5.33E-47 |
| PA5556 | atpA   | 7.59  | 1.88E-46 |
| PA5554 | atpD   | 6.84  | 1.7E-44  |
| PA4237 | rplQ   | 6.33  | 1.95E-43 |
| PA4671 | PA4671 | 5.60  | 2.48E-39 |
| PA1746 | PA1746 | 3.06  | 1.57E-38 |
| PA4670 | prs    | 2.18  | 1.83E-34 |
| PA3014 | faoA   | 2.25  | 9.11E-34 |
| PA3159 | wbpA   | 2.28  | 6.46E-33 |
| PA5128 | secB   | 2.29  | 8.74E-31 |
| PA4270 | rpoB   | 4.91  | 1.24E-26 |
| PA1553 | ccoO1  | 2.25  | 1.64E-24 |
| PA3150 | wbpG   | 2.49  | 5.12E-22 |
| PA5005 | PA5005 | 2.12  | 1.22E-20 |
| PA3309 | PA3309 | 1.86  | 3.14E-20 |
| PA4352 | PA4352 | 2.16  | 2.38E-17 |
| PA4582 | PA4582 | 3.44  | 4.33E-16 |
| PA0576 | rpoD   | 1.73  | 7.39E-15 |
| PA4481 | mreB   | 1.83  | 1.09E-10 |
| PA4756 | carB   | 1.76  | 1.34E-09 |
| PA1787 | acnB   | 1.56  | 3.79E-07 |
| PA4333 | PA4333 | 1.67  | 5.17E-07 |
| PA2999 | nqrA   | 1.71  | 1.8E-06  |
| PA2540 | PA2540 | 2.54  | 7.3E-06  |
| PA4941 | hflC   | 1.45  | 0.00016  |
| PA2994 | nqrF   | 3.16  | 1.38E-35 |
| PA0620 | PA0620 | 3.59  | 1.7E-36  |
| PA0985 | pyoS5  | 5.21  | 9.19E-35 |
| PA1150 | pys2   | 2.08  | 7.12E-11 |
| PA1080 | flgE   | 1.83  | 3.06E-09 |
| PA1086 | flgK   | 2.08  | 1.66E-12 |
| PA3262 | PA3262 | 1.69  | 8.25E-12 |
| PA3901 | fecA   | 40.02 | 4.7E-164 |
| PA0165 | PA0165 | 17.14 | 3.5E-144 |
| PA4675 | PA4675 | 7.00  | 2.59E-58 |
| PA1288 | PA1288 | 2.91  | 2.28E-44 |
| PA1271 | PA1271 | 6.61  | 1.84E-23 |
| PA3268 | PA3268 | 7.00  | 1.26E-20 |
| PA0162 | opdC   | 5.98  | 1.93E-20 |
| PA2462 | PA2462 | 5.11  | 1.12E-15 |
| PA3800 | PA3800 | 3.83  | 7.9E-137 |
| PA0625 | PA0625 | 8.63  | 9.7E-108 |

|        |        |       |          |
|--------|--------|-------|----------|
| PA3082 | gbt    | 6.25  | 2.11E-58 |
| PA1011 | PA1011 | 2.37  | 2.28E-34 |
| PA0641 | PA0641 | 5.33  | 1.34E-28 |
| PA2463 | PA2463 | 14.42 | 8.6E-25  |
| PA5441 | PA5441 | 2.00  | 7.17E-10 |
| PA4277 | tufB   | 3.52  | 2.01E-97 |
| PA3999 | dacC   | 2.19  | 1.23E-22 |
| PA0594 | surA   | 4.03  | 1.2E-123 |
| PA0972 | tolB   | 1.98  | 1.76E-15 |
| PA0636 | PA0636 | 6.34  | 4.07E-82 |
| PA2624 | idh    | 3.38  | 3.71E-65 |
| PA0955 | PA0955 | 2.53  | 5.51E-20 |
| PA5113 | PA5113 | 3.56  | 1.47E-16 |
| PA2642 | nuoG   | 1.98  | 1.59E-13 |
| PA3483 | PA3483 | 1.78  | 6.49E-05 |
| PA1555 | ccoP2  | 18.86 | 3.1E-163 |
| PA3801 | PA3801 | 3.62  | 3E-124   |
| PA0045 | PA0045 | 59.74 | 1.1E-118 |
| PA0622 | PA0622 | 5.02  | 1.4E-115 |
| PA3716 | PA3716 | 4.30  | 1.2E-108 |
| PA3115 | fimV   | 3.33  | 1.38E-90 |
| PA0633 | PA0633 | 4.95  | 3.4E-89  |
| PA1791 | PA1791 | 13.53 | 1.84E-64 |
| PA0277 | PA0277 | 8.96  | 1.29E-58 |
| PA4429 | PA4429 | 2.83  | 3.53E-58 |
| PA2952 | etfB   | 4.52  | 1.57E-54 |
| PA1552 | ccoP1  | 3.02  | 1.32E-48 |
| PA2453 | PA2453 | 11.91 | 1.62E-40 |
| PA0070 | tagQ1  | 2.88  | 7.84E-39 |
| PA0623 | PA0623 | 4.49  | 4.95E-30 |
| PA2997 | nqrC   | 3.37  | 1.8E-23  |
| PA4372 | PA4372 | 2.57  | 1.91E-23 |
| PA4480 | mreC   | 3.57  | 3.37E-23 |
| PA0126 | PA0126 | 4.36  | 8.3E-23  |
| PA5130 | PA5130 | 2.16  | 3.72E-18 |
| PA4390 | PA4390 | 2.54  | 6.6E-16  |
| PA5146 | PA5146 | 2.11  | 2.24E-14 |
| PA2264 | PA2264 | 2.25  | 2.06E-10 |
| PA5414 | PA5414 | 2.12  | 4.08E-10 |
| PA5136 | PA5136 | 2.53  | 7.8E-07  |
| PA1483 | cycH   | 3.05  | 9.44E-24 |
| PA3804 | PA3804 | 1.85  | 2.4E-08  |
| PA4614 | mscL   | -2.13 | 0        |

|        |        |        |          |
|--------|--------|--------|----------|
| PA0114 | senC   | -2.71  | 7.75E-27 |
| PA1180 | phoQ   | -35.95 | 1.3E-175 |
| PA1775 | cmpX   | -1.63  | 4.45E-09 |
| PA2815 | PA2815 | -8.59  | 5.3E-129 |
| PA2830 | htpX   | -3.46  | 8.36E-90 |
| PA3553 | arnC   | -47.41 | 8.1E-182 |
| PA4455 | PA4455 | -1.60  | 9.21E-10 |
| PA2623 | icd    | -2.61  | 0        |
| PA5119 | glnA   | -2.07  | 0        |
| PA0588 | PA0588 | -19.03 | 1.53E-68 |
| PA2023 | galU   | -1.41  | 8.22E-08 |
| PA3531 | bfrB   | -1.63  | 0        |
| PA3554 | arnA   | -10.21 | 8.1E-70  |
| PA3602 | PA3602 | -2.40  | 3.53E-27 |
| PA4022 | PA4022 | -10.82 | 2.31E-68 |
| PA4775 | PA4775 | -2.70  | 0.000337 |
| PA4525 | pilA   | -1.39  | 1.77E-08 |
| PA1053 | PA1053 | -23.70 | 0        |
| PA3623 | PA3623 | -18.21 | 4.8E-295 |
| PA4735 | PA4735 | -2.22  | 4.72E-25 |
| PA2065 | pcoA   | -10.87 | 5.84E-12 |
| PA3031 | PA3031 | -4.28  | 0        |
| PA3040 | PA3040 | -7.09  | 6.1E-165 |
| PA3691 | PA3691 | -9.08  | 4.71E-48 |
| PA4495 | PA4495 | -3.13  | 2.11E-65 |
| PA4773 | PA4773 | -2.80  | 5.2E-12  |
| PA4876 | osmE   | -16.94 | 2.4E-213 |
| PA5253 | algP   | -2.67  | 0        |



**Table S3: Changes in murine gene expression in response to infection measured by RNA-seq.** Fold changes greater than 1 indicate that the gene was up-regulated in *P. aeruginosa* infected mice compared to non-infected mice. Fold changes inferior to -1 indicate that the gene was down-regulated in *P. aeruginosa* infected mice compared to non-infected mice.

| Gene      | Fold change | p-value   |
|-----------|-------------|-----------|
| Csf3      | 706.23      | 8.93E-104 |
| Cxcl2     | 487.41      | 5.38E-159 |
| Mt2       | 311.95      | 1.45E-203 |
| Cxcl1     | 251.63      | 2.80E-118 |
| Irg1      | 223.92      | 1.71E-44  |
| Ngp       | 215.56      | 2.88E-126 |
| Il6       | 195.34      | 7.34E-35  |
| Cxcl3     | 180.12      | 6.70E-59  |
| Cxcl10    | 128.13      | 1.19E-20  |
| Saa3      | 108.39      | 7.40E-39  |
| Adamts4   | 101.25      | 2.78E-14  |
| Ccl3      | 100.25      | 1.79E-119 |
| Ccl4      | 93.16       | 1.22E-33  |
| Rsad2     | 90.82       | 2.13E-44  |
| Ccl2      | 89.77       | 2.76E-28  |
| Cxcl5     | 87.22       | 1.08E-21  |
| Cxcl9     | 86.44       | 2.26E-11  |
| Tnfaip3   | 85.2        | 1.05E-132 |
| Mt1       | 73.22       | 2.38E-136 |
| Ccl20     | 66.12       | 1.18E-15  |
| Ptx3      | 65.64       | 9.86E-09  |
| Ifitm6    | 65.59       | 4.32E-23  |
| Gpr84     | 61.14       | 1.93E-08  |
| Ccl7      | 56.16       | 1.33E-09  |
| Cd14      | 55.26       | 2.16E-100 |
| Il1f9     | 53.72       | 5.40E-14  |
| Il1r2     | 53.37       | 2.51E-09  |
| Slfn4     | 50.39       | 1.42E-14  |
| Serpina3f | 50.37       | 2.37E-20  |
| Camp      | 48.42       | 1.76E-10  |
| Gm29408   | 47.15       | 6.15E-30  |
| Apol8     | 45.17       | 8.55E-06  |
| Trem1     | 43.32       | 2.06E-13  |
| Oasl1     | 42.25       | 1.45E-07  |
| Lilrb4    | 42.13       | 2.28E-97  |
| Gm17268   | 41.49       | 1.71E-05  |
| S100a9    | 40.92       | 1.20E-158 |

|          |       |           |
|----------|-------|-----------|
| Mx2      | 39.28 | 5.88E-12  |
| Socs3    | 37.97 | 7.34E-97  |
| Tnf      | 37.2  | 3.26E-23  |
| Mmp8     | 34.28 | 2.86E-07  |
| Il1rn    | 34.05 | 3.73E-15  |
| Gm15287  | 34    | 6.61E-05  |
| Retnlg   | 31.76 | 4.49E-76  |
| Selp     | 31.47 | 6.61E-05  |
| Ccrn4l   | 30.94 | 3.10E-20  |
| Lcn2     | 30.85 | 7.39E-104 |
| Tmem252  | 30.62 | 2.45E-30  |
| Asprv1   | 30.58 | 6.53E-10  |
| Gm26809  | 30.29 | 1.91E-174 |
| Ifit1    | 30.28 | 1.12E-26  |
| AA467197 | 29.87 | 5.14E-04  |
| Nlrp3    | 29.35 | 8.64E-11  |
| Clec4d   | 29.34 | 9.69E-09  |
| Rnd1     | 28.7  | 1.82E-13  |
| Gm12840  | 28.62 | 5.75E-111 |
| S100a8   | 28.38 | 4.61E-134 |
| Gm4951   | 28.28 | 2.51E-09  |
| Mrgpra2a | 28.07 | 2.59E-04  |
| Gdf15    | 26.57 | 3.49E-13  |
| Prss22   | 26.52 | 2.59E-04  |
| Clec4e   | 26.43 | 3.33E-10  |
| Gm13086  | 25.62 | 1.20E-10  |
| Osm      | 25.04 | 1.01E-15  |
| Csf2     | 24.98 | 4.44E-11  |
| Gm16242  | 24.89 | 1.69E-05  |
| Rab36    | 24.54 | 3.32E-10  |
| Nfkbia   | 24.54 | 5.95E-101 |
| Adam8    | 24.01 | 7.01E-15  |
| Sele     | 23.9  | 1.11E-06  |
| Stfa2l1  | 23.63 | 1.69E-05  |
| Gm10872  | 23.21 | 3.37E-05  |
| Zc3h12a  | 23.01 | 1.18E-23  |
| Apold1   | 23    | 4.07E-17  |
| Mx1      | 22.98 | 3.75E-08  |
| Isg15    | 22.9  | 2.13E-21  |
| Plaur    | 22.37 | 6.99E-26  |
| Ch25h    | 21.9  | 1.37E-34  |
| Irak3    | 21.72 | 2.86E-07  |
| Ifit2    | 21.5  | 3.80E-18  |

|               |       |           |
|---------------|-------|-----------|
| Irgm1         | 21.32 | 3.86E-30  |
| Inhbb         | 21.24 | 4.12E-24  |
| E230013L22Rik | 21.16 | 5.82E-09  |
| Gm5483        | 21.08 | 5.14E-04  |
| Cdkn1a        | 21.08 | 2.25E-30  |
| Art3          | 20.89 | 1.31E-04  |
| Gm26545       | 20.74 | 5.14E-04  |
| Steap4        | 20.64 | 8.80E-12  |
| Cd33          | 20.58 | 8.44E-20  |
| Gpr31b        | 20.55 | 8.68E-06  |
| Akap12        | 20.48 | 3.43E-32  |
| Ptgs2         | 20.41 | 2.83E-23  |
| Sphk1         | 20.05 | 1.50E-22  |
| Smox          | 19.9  | 7.49E-08  |
| Cd80          | 19.86 | 2.59E-04  |
| Gm16685       | 19.81 | 1.31E-04  |
| Socs1         | 19.4  | 4.47E-21  |
| Iigp1         | 19.29 | 4.05E-31  |
| Lif           | 19.26 | 2.19E-06  |
| Gm13889       | 19.19 | 3.40E-138 |
| Slfn1         | 19.01 | 8.84E-12  |
| Fut2          | 18.88 | 6.61E-05  |
| RP23-354D10.2 | 18.59 | 8.81E-40  |
| Gbp5          | 18.58 | 1.42E-07  |
| Sfn           | 18.45 | 1.08E-28  |
| Il18rap       | 18.35 | 2.06E-08  |
| Cldn4         | 18.31 | 3.02E-20  |
| Ccl11         | 18.06 | 2.19E-06  |
| Gm14023       | 17.97 | 1.31E-04  |
| Slc39a14      | 17.85 | 9.78E-07  |
| Ccl2          | 17.7  | 1.07E-104 |
| 1200007C13Rik | 17.58 | 2.99E-09  |
| Il1b          | 17.54 | 2.32E-65  |
| Serpina3i     | 17.33 | 6.46E-13  |
| Nfil3         | 17.32 | 6.12E-11  |
| Gm20645       | 17.32 | 4.63E-32  |
| Rnf125        | 17.24 | 1.86E-06  |
| Dll1          | 17.23 | 2.72E-14  |
| Sema4c        | 17.18 | 9.29E-23  |
| Fam26f        | 17.17 | 6.63E-05  |
| Dio2          | 17.15 | 3.93E-08  |
| Orm1          | 17.03 | 1.31E-04  |
| Gm26667       | 16.83 | 5.14E-04  |

|           |       |           |
|-----------|-------|-----------|
| Slfn2     | 16.79 | 2.47E-47  |
| Rnf149    | 16.62 | 9.76E-14  |
| Cmpk2     | 16.33 | 1.21E-12  |
| Tnip1     | 16.32 | 1.20E-12  |
| Gm28863   | 16.23 | 4.28E-10  |
| Hk2       | 16.07 | 2.38E-05  |
| Ptafr     | 15.93 | 1.26E-05  |
| Basp1     | 15.86 | 1.31E-04  |
| Map3k6    | 15.65 | 6.61E-05  |
| Mamstr    | 15.43 | 7.49E-08  |
| Thbs1     | 15.16 | 5.55E-125 |
| Fosl2     | 15.09 | 5.76E-28  |
| Malt1     | 15    | 7.99E-12  |
| Gbp2      | 15    | 1.20E-14  |
| Birc3     | 15    | 8.87E-26  |
| Myc       | 14.89 | 4.32E-12  |
| Ccr1      | 14.88 | 2.78E-14  |
| Serpina3n | 14.72 | 6.71E-24  |
| Pim1      | 14.67 | 2.76E-68  |
| Rasd1     | 14.6  | 2.07E-08  |
| Slc7a15   | 14.48 | 2.06E-08  |
| Bcl3      | 14.48 | 1.56E-09  |
| Hcar2     | 14.45 | 1.20E-26  |
| Ltf       | 14.34 | 2.38E-05  |
| Itpkc     | 14.34 | 2.71E-07  |
| Gm5530    | 14.31 | 1.89E-13  |
| Wfdc17    | 14.27 | 3.34E-05  |
| Pfkfb3    | 14.21 | 1.49E-11  |
| Mmp9      | 13.82 | 6.67E-06  |
| Tlr2      | 13.82 | 3.84E-35  |
| Sod2      | 13.81 | 5.53E-35  |
| Gem       | 13.62 | 1.20E-14  |
| Abi1      | 13.57 | 3.12E-23  |
| Mefv      | 13.47 | 1.31E-04  |
| Rab20     | 13.42 | 4.49E-05  |
| Fpr1      | 13.41 | 1.20E-09  |
| Ifit3     | 13.34 | 1.47E-35  |
| Mxd1      | 13.33 | 1.00E-15  |
| Vcan      | 13.32 | 2.59E-04  |
| Gm15832   | 13.32 | 7.54E-08  |
| Cebpd     | 13.24 | 1.86E-120 |
| Ifih1     | 13.22 | 2.06E-08  |
| Kcne4     | 13.05 | 5.07E-08  |

|           |       |           |
|-----------|-------|-----------|
| Lrrc25    | 12.88 | 9.80E-07  |
| Dusp2     | 12.87 | 9.96E-11  |
| Il1a      | 12.83 | 5.20E-07  |
| Ccl17     | 12.77 | 2.60E-04  |
| Txnrd1    | 12.74 | 1.94E-11  |
| Casp4     | 12.69 | 4.49E-05  |
| Gm20400   | 12.66 | 2.71E-07  |
| Gm12248   | 12.63 | 5.56E-04  |
| Tnfaip2   | 12.52 | 3.18E-20  |
| Serpina3h | 12.49 | 1.95E-11  |
| Rbbp8     | 12.44 | 3.44E-10  |
| Cd274     | 12.44 | 2.19E-16  |
| Marcksl1  | 12.42 | 7.63E-40  |
| Cish      | 12.37 | 3.60E-19  |
| Smim3     | 12.26 | 1.26E-05  |
| Slc15a3   | 12.2  | 9.29E-08  |
| Dbn1      | 12.03 | 6.66E-06  |
| Nfkbiz    | 11.94 | 4.20E-18  |
| Arid5a    | 11.72 | 2.23E-10  |
| Csrnp1    | 11.63 | 5.59E-04  |
| Srgn      | 11.61 | 8.63E-15  |
| Rnf19b    | 11.57 | 9.30E-08  |
| Chd9      | 11.46 | 4.18E-09  |
| F3        | 11.43 | 1.56E-14  |
| Icam1     | 11.41 | 1.43E-119 |
| Gm9115    | 11.3  | 9.43E-08  |
| Trib1     | 11.19 | 2.42E-22  |
| Spry4     | 11.17 | 2.49E-17  |
| Sp140     | 11.16 | 2.38E-05  |
| Ddit4     | 11.08 | 1.25E-14  |
| Parp14    | 11.05 | 1.49E-16  |
| Cxcr2     | 10.9  | 8.43E-09  |
| P2ry2     | 10.86 | 1.85E-06  |
| Dennd4a   | 10.86 | 7.79E-09  |
| Daxx      | 10.75 | 1.06E-11  |
| Plscr1    | 10.72 | 2.52E-09  |
| Prr7      | 10.66 | 1.26E-05  |
| Irgm2     | 10.59 | 2.52E-09  |
| Themis2   | 10.56 | 8.41E-09  |
| Odc1      | 10.55 | 4.13E-10  |
| Sgms2     | 10.38 | 4.48E-05  |
| Abtb2     | 10.37 | 2.97E-04  |
| Sbno2     | 10.34 | 3.57E-11  |

|               |       |           |
|---------------|-------|-----------|
| Lmnb1         | 10.32 | 2.97E-04  |
| Hif1a         | 10.28 | 5.03E-08  |
| Pik3ap1       | 10.17 | 6.75E-06  |
| Ackr3         | 9.97  | 6.45E-12  |
| Csf1          | 9.9   | 4.17E-10  |
| Hdc           | 9.84  | 5.85E-14  |
| Rel           | 9.82  | 1.26E-05  |
| Egr1          | 9.75  | 1.53E-78  |
| Klhl6         | 9.74  | 2.38E-05  |
| Sdc4          | 9.72  | 1.42E-32  |
| Ampd3         | 9.62  | 1.59E-04  |
| Osmr          | 9.6   | 4.60E-09  |
| Map3k8        | 9.55  | 9.25E-08  |
| Tiparp        | 9.49  | 4.62E-09  |
| Maff          | 9.26  | 2.52E-09  |
| Kdm6b         | 9.14  | 9.36E-19  |
| Zfp46         | 9.06  | 5.32E-17  |
| Litaf         | 9.02  | 1.59E-04  |
| Glrx          | 9.02  | 1.36E-09  |
| Tubb6         | 8.99  | 2.00E-06  |
| C5ar1         | 8.86  | 1.36E-04  |
| Ntng2         | 8.84  | 2.97E-04  |
| Plk3          | 8.81  | 2.00E-06  |
| Il10ra        | 8.77  | 1.68E-07  |
| Ppp1r15a      | 8.76  | 7.75E-32  |
| Fmnl2         | 8.68  | 4.48E-05  |
| Tbce          | 8.59  | 6.24E-12  |
| 9030624G23Rik | 8.58  | 8.44E-05  |
| Arg2          | 8.54  | 1.35E-04  |
| I830012O16Rik | 8.44  | 1.37E-09  |
| Gm20689       | 8.43  | 1.56E-10  |
| Irf1          | 8.4   | 8.89E-25  |
| Plat          | 8.36  | 8.44E-05  |
| Serpine1      | 8.36  | 8.50E-20  |
| Adamts9       | 8.35  | 6.74E-06  |
| Dhx40         | 8.34  | 4.11E-05  |
| Nfkb2         | 8.34  | 1.36E-09  |
| Tap1          | 8.33  | 6.76E-11  |
| Pgs1          | 8.3   | 1.36E-09  |
| RP23-27C10.1  | 8.23  | 1.59E-04  |
| Plek          | 8.23  | 5.47E-07  |
| Ifitm5        | 8.2   | 7.56E-05  |
| Neat1         | 8.2   | 3.65E-109 |

|           |      |           |
|-----------|------|-----------|
| Nampt     | 8.14 | 1.78E-06  |
| Gm14928   | 8.09 | 2.92E-09  |
| Cd53      | 8.07 | 6.76E-06  |
| Fas       | 8    | 7.48E-05  |
| Oasl2     | 8    | 5.72E-06  |
| Mapk6     | 7.97 | 9.88E-07  |
| N4bp1     | 7.96 | 4.53E-08  |
| Irf7      | 7.91 | 1.02E-05  |
| Pdlim7    | 7.9  | 3.19E-06  |
| Fcer1g    | 7.85 | 3.04E-07  |
| Hck       | 7.84 | 2.45E-04  |
| Ccl5      | 7.8  | 6.77E-06  |
| Rtp4      | 7.77 | 1.43E-08  |
| Tuba1c    | 7.74 | 5.50E-07  |
| Parp9     | 7.67 | 4.11E-05  |
| Nfkbie    | 7.66 | 6.74E-06  |
| Il4ra     | 7.6  | 8.18E-15  |
| Dgat1     | 7.56 | 8.05E-07  |
| Rnf213    | 7.5  | 1.21E-09  |
| Ehd1      | 7.42 | 4.56E-15  |
| Ier3      | 7.38 | 2.53E-151 |
| Serpina3g | 7.33 | 2.51E-06  |
| Gm12250   | 7.31 | 2.19E-09  |
| Gvin1     | 7.27 | 4.41E-04  |
| Gadd45b   | 7.25 | 2.08E-31  |
| Pmaip1    | 7.23 | 3.19E-06  |
| Tnfrsf12a | 7.16 | 1.26E-08  |
| Phlda1    | 7.01 | 4.65E-25  |
| Rps3a3    | 6.98 | 3.97E-10  |
| Syk       | 6.96 | 1.02E-05  |
| Stx11     | 6.93 | 3.19E-06  |
| Gadd45g   | 6.91 | 1.38E-11  |
| Helz2     | 6.91 | 4.71E-20  |
| Bhlhe40   | 6.89 | 3.25E-18  |
| Tnfrsf1b  | 6.87 | 5.71E-06  |
| Dusp16    | 6.73 | 1.01E-04  |
| Junb      | 6.71 | 7.42E-82  |
| Bcl2l11   | 6.66 | 1.01E-04  |
| Myd88     | 6.65 | 5.82E-05  |
| Tpd52     | 6.64 | 4.40E-04  |
| Nelfe     | 6.63 | 3.10E-04  |
| Retsat    | 6.6  | 7.69E-06  |
| Gm17709   | 6.54 | 2.45E-04  |

|          |      |          |
|----------|------|----------|
| Nfkb1    | 6.54 | 7.68E-06 |
| Slc6a14  | 6.49 | 2.45E-04 |
| Rnd3     | 6.43 | 2.34E-05 |
| Errfi1   | 6.42 | 6.85E-24 |
| Cebpb    | 6.41 | 3.34E-38 |
| Furin    | 6.38 | 9.19E-13 |
| Rab8b    | 6.32 | 1.02E-05 |
| Ogfr     | 6.32 | 4.16E-09 |
| Gbp8     | 6.29 | 2.45E-04 |
| Btg1     | 6.29 | 3.92E-40 |
| Anxa1    | 6.28 | 9.54E-09 |
| Tbk1     | 6.27 | 1.01E-04 |
| Rabgef1  | 6.27 | 4.04E-05 |
| Fth1     | 6.27 | 9.35E-56 |
| Ptpn1    | 6.24 | 1.83E-06 |
| Slc25a25 | 6.22 | 7.88E-04 |
| Slc16a13 | 6.2  | 1.34E-05 |
| Rhoc     | 6.18 | 5.71E-15 |
| Mapkapk2 | 6.15 | 3.66E-08 |
| Vcam1    | 6.12 | 5.47E-06 |
| Gadd45a  | 6.12 | 1.66E-08 |
| Chmp4b   | 6.08 | 1.01E-04 |
| Sntb2    | 6.06 | 7.88E-04 |
| Xdh      | 6.06 | 4.05E-05 |
| Slc27a4  | 5.96 | 7.88E-04 |
| Trafd1   | 5.94 | 3.17E-06 |
| Snord17  | 5.87 | 1.24E-26 |
| Hbegf    | 5.86 | 1.20E-04 |
| Map2k3   | 5.85 | 5.71E-05 |
| Robo4    | 5.84 | 1.49E-07 |
| Xaf1     | 5.82 | 1.77E-04 |
| Gramd1a  | 5.77 | 1.77E-04 |
| Birc2    | 5.77 | 4.40E-07 |
| Clic4    | 5.75 | 4.61E-21 |
| Zc3hav1  | 5.73 | 9.38E-06 |
| Fbxl5    | 5.72 | 4.40E-04 |
| Gm12854  | 5.71 | 3.32E-06 |
| Pvr      | 5.7  | 7.88E-04 |
| Gm26982  | 5.68 | 1.78E-04 |
| Lipg     | 5.67 | 3.10E-04 |
| Mob3c    | 5.65 | 1.77E-04 |
| Gm27019  | 5.65 | 2.75E-05 |
| Dtx3l    | 5.61 | 1.83E-06 |



|               |      |           |
|---------------|------|-----------|
| Ets2          | 5.57 | 4.69E-13  |
| Tgif1         | 5.56 | 5.39E-04  |
| Gm6485        | 5.56 | 1.75E-13  |
| Zfp36         | 5.53 | 1.63E-125 |
| Gm20603       | 5.49 | 5.59E-11  |
| Cd63-ps       | 5.47 | 1.97E-08  |
| Sema7a        | 5.45 | 9.35E-04  |
| Gm6977        | 5.45 | 1.64E-121 |
| Etv3          | 5.41 | 4.41E-07  |
| Tgm2          | 5.4  | 2.31E-10  |
| Gm23444       | 5.36 | 3.95E-08  |
| Stk19         | 5.35 | 9.35E-04  |
| Cd44          | 5.34 | 1.25E-07  |
| Hsp25-ps1     | 5.28 | 1.73E-56  |
| Tet2          | 5.2  | 3.10E-04  |
| Il17ra        | 5.17 | 7.88E-05  |
| Aff1          | 5.16 | 6.98E-05  |
| Gm22486       | 5.1  | 5.50E-04  |
| Plekho2       | 5.06 | 5.95E-04  |
| Ncf1          | 4.97 | 5.39E-04  |
| Rnasel        | 4.97 | 3.51E-04  |
| Cfb           | 4.97 | 1.80E-05  |
| Pim3          | 4.96 | 1.19E-11  |
| Stat3         | 4.94 | 1.16E-05  |
| Ier2          | 4.93 | 1.43E-61  |
| Ralgds        | 4.9  | 9.35E-04  |
| Rac2          | 4.88 | 2.06E-04  |
| Rnf19a        | 4.87 | 2.23E-04  |
| Bach1         | 4.85 | 4.65E-05  |
| Cp            | 4.82 | 3.02E-05  |
| Snx18         | 4.81 | 6.99E-06  |
| Trim25        | 4.81 | 1.65E-06  |
| Egln2         | 4.81 | 9.37E-08  |
| Skil          | 4.8  | 1.65E-06  |
| H2-Q4         | 4.8  | 2.41E-18  |
| H3f3b         | 4.79 | 2.39E-41  |
| Gm4070        | 4.76 | 9.35E-04  |
| RP24-252K15.3 | 4.75 | 4.61E-10  |
| F630028O10Rik | 4.7  | 4.66E-05  |
| Rgcc          | 4.69 | 5.04E-05  |
| Taf7          | 4.69 | 3.19E-05  |
| Gm8995        | 4.69 | 3.47E-14  |
| Ankrd12       | 4.67 | 5.96E-04  |

|               |      |          |
|---------------|------|----------|
| Ccl9          | 4.64 | 3.51E-04 |
| Enc1          | 4.61 | 2.06E-04 |
| Dennd3        | 4.61 | 6.16E-04 |
| Ccnl1         | 4.6  | 1.01E-07 |
| Ppp1r18       | 4.57 | 4.19E-06 |
| Klf6          | 4.55 | 1.65E-29 |
| Igfbp3        | 4.44 | 1.59E-11 |
| 4933426M11Rik | 4.43 | 1.99E-05 |
| Gm23971       | 4.43 | 2.56E-07 |
| Per1          | 4.37 | 3.25E-05 |
| Sik1          | 4.37 | 3.83E-10 |
| 42068         | 4.35 | 6.17E-04 |
| Il31ra        | 4.34 | 2.47E-04 |
| Rhob          | 4.23 | 1.67E-82 |
| Dusp1         | 4.23 | 1.74E-78 |
| Prss23        | 4.18 | 2.27E-04 |
| Rrs1          | 4.15 | 3.28E-05 |
| H2-Q6         | 4.14 | 7.71E-06 |
| Riok3         | 4.13 | 1.40E-04 |
| Ier5          | 4.09 | 1.27E-14 |
| Etf1          | 4.02 | 3.75E-04 |
| Irf9          | 4.02 | 3.75E-04 |
| Pxdc1         | 4.02 | 2.00E-05 |
| Bcl2l1        | 4    | 2.28E-04 |
| Gna13         | 4    | 1.24E-05 |
| Gja1          | 3.99 | 1.83E-06 |
| Glul          | 3.98 | 1.90E-13 |
| Edn1          | 3.97 | 7.65E-06 |
| Grina         | 3.95 | 7.33E-13 |
| Gm23472       | 3.89 | 8.59E-05 |
| Lyve1         | 3.88 | 2.71E-11 |
| Nabp1         | 3.86 | 9.90E-04 |
| Gclc          | 3.85 | 1.40E-04 |
| S1pr1         | 3.84 | 5.39E-29 |
| Zfp281        | 3.83 | 4.38E-07 |
| Znfx1         | 3.82 | 2.26E-04 |
| Srxn1         | 3.81 | 6.11E-04 |
| Lrg1          | 3.81 | 4.28E-28 |
| Mcl1          | 3.77 | 8.89E-38 |
| Efhd2         | 3.76 | 6.11E-04 |
| Rela          | 3.76 | 2.99E-05 |
| Picalm        | 3.74 | 1.23E-05 |
| Ppp1r15b      | 3.72 | 1.84E-10 |

|               |      |          |
|---------------|------|----------|
| Rab7          | 3.71 | 2.26E-04 |
| Sav1          | 3.68 | 8.50E-05 |
| Prdx5         | 3.64 | 1.80E-05 |
| 2810474O19Rik | 3.62 | 2.69E-06 |
| Carhsp1       | 3.58 | 7.83E-05 |
| Rasip1        | 3.57 | 2.52E-07 |
| Rab11fip1     | 3.55 | 4.42E-06 |
| Gm26316       | 3.54 | 3.06E-05 |
| Adamts1       | 3.51 | 3.93E-13 |
| Gm12966       | 3.51 | 8.89E-26 |
| Csf2ra        | 3.5  | 5.52E-04 |
| Stk17b        | 3.47 | 9.37E-04 |
| St3gal1       | 3.47 | 1.00E-06 |
| Eif1          | 3.47 | 2.89E-28 |
| Tnks1bp1      | 3.45 | 4.38E-05 |
| Mir6236       | 3.45 | 1.97E-04 |
| Eif5          | 3.43 | 1.39E-07 |
| Sspn          | 3.43 | 3.75E-13 |
| Id2           | 3.39 | 5.26E-12 |
| Rnu3b2        | 3.37 | 1.81E-05 |
| Rnu3a         | 3.32 | 7.67E-06 |
| Gm10020       | 3.29 | 2.09E-11 |
| Gm15801       | 3.27 | 8.00E-04 |
| Cflar         | 3.27 | 5.09E-04 |
| Bcl6b         | 3.25 | 4.64E-04 |
| Marcks        | 3.25 | 7.63E-16 |
| Mafk          | 3.2  | 4.64E-04 |
| Tacstd2       | 3.19 | 1.75E-10 |
| Rnu3b3        | 3.16 | 5.48E-05 |
| Cxcl16        | 3.14 | 6.24E-05 |
| Rnu3b4        | 3.12 | 4.07E-04 |
| Tpm3          | 3.09 | 1.61E-04 |
| Arhgap21      | 3.09 | 4.17E-18 |
| Ppp1r2-ps2    | 3.03 | 4.30E-05 |
| Sqstm1        | 3.03 | 1.56E-08 |
| Lox           | 3.02 | 7.21E-06 |
| Slfn5         | 3.01 | 2.01E-05 |
| Ptp4a1        | 2.99 | 1.53E-05 |
| Gm9835        | 2.99 | 2.63E-07 |
| Ifitm3        | 2.98 | 5.87E-24 |
| Hba-a2        | 2.96 | 3.63E-13 |
| Rap1b         | 2.91 | 5.03E-04 |
| Rnu3b1        | 2.91 | 1.10E-05 |

|               |      |          |
|---------------|------|----------|
| Tpm3-rs7      | 2.9  | 1.18E-29 |
| Jarid2        | 2.89 | 9.53E-05 |
| Cd47          | 2.88 | 9.71E-04 |
| H2-K1         | 2.88 | 3.96E-18 |
| Spry2         | 2.87 | 5.05E-04 |
| Ddx3x         | 2.83 | 3.02E-10 |
| Slc38a2       | 2.8  | 1.03E-04 |
| Ctla2a        | 2.78 | 3.30E-06 |
| Gm24950       | 2.77 | 7.86E-06 |
| Myh9          | 2.72 | 3.85E-04 |
| Rpl14-ps1     | 2.72 | 5.19E-12 |
| Midn          | 2.71 | 1.99E-04 |
| Zfp703        | 2.71 | 2.21E-05 |
| Gm10232       | 2.68 | 5.63E-05 |
| Ppp1r2-ps4    | 2.67 | 7.83E-14 |
| Gm23849       | 2.65 | 3.01E-07 |
| Hspb1         | 2.64 | 4.69E-15 |
| Cdk8          | 2.64 | 2.08E-14 |
| Gm10156       | 2.58 | 3.75E-05 |
| Gm8822        | 2.56 | 8.18E-08 |
| Gm23119       | 2.55 | 5.68E-04 |
| Eif3s6-ps2    | 2.54 | 5.05E-04 |
| Hbb-bt        | 2.54 | 1.08E-16 |
| Eif1-ps1      | 2.52 | 1.10E-05 |
| Atf4          | 2.49 | 1.61E-12 |
| Yam1          | 2.48 | 2.51E-04 |
| Gm15453       | 2.46 | 5.36E-06 |
| Gm9791        | 2.45 | 4.13E-04 |
| Tapbp         | 2.41 | 1.11E-05 |
| 1810049J17Rik | 2.41 | 2.23E-09 |
| Esam          | 2.39 | 6.83E-04 |
| Gm8203        | 2.39 | 1.49E-04 |
| Kctd12        | 2.36 | 1.87E-04 |
| Gm7809        | 2.36 | 3.40E-07 |
| Xbp1          | 2.35 | 3.20E-05 |
| Ifitm2        | 2.33 | 9.74E-15 |
| Eif4a1        | 2.28 | 8.21E-04 |
| Gm9855        | 2.28 | 5.06E-04 |
| Erdr1         | 2.28 | 3.58E-04 |
| AY036118      | 2.27 | 7.06E-07 |
| Gm9845        | 2.26 | 4.64E-05 |
| Cmss1         | 2.26 | 4.87E-15 |
| Gm10254       | 2.25 | 2.38E-05 |

|               |       |          |
|---------------|-------|----------|
| Srsf5         | 2.24  | 5.50E-07 |
| Gm15487       | 2.24  | 2.05E-05 |
| Gm7334        | 2.23  | 5.87E-09 |
| Sat1          | 2.2   | 2.23E-06 |
| Gm1821        | 2.18  | 3.02E-13 |
| Rnu2-10       | 2.17  | 1.52E-04 |
| Jund          | 2.17  | 2.76E-13 |
| Slc39a1       | 2.16  | 8.04E-04 |
| Hba-a1        | 2.11  | 5.87E-09 |
| Rps27a-ps2    | 2.09  | 4.50E-07 |
| Hbb-bs        | 2.07  | 4.82E-19 |
| Gm12895       | 2.02  | 5.26E-04 |
| n-R5-8s1      | 2.02  | 1.17E-20 |
| Prdx6         | 1.96  | 3.38E-05 |
| Gm13394       | 1.95  | 9.10E-04 |
| Ubc           | 1.89  | 4.60E-19 |
| Gm9762        | 1.88  | 3.99E-05 |
| Ctgf          | 1.85  | 4.41E-06 |
| H2-D1         | 1.84  | 1.49E-15 |
| Gm13370       | 1.81  | 5.90E-04 |
| Gm12715       | 1.81  | 3.80E-26 |
| Tgoln1        | 1.79  | 1.22E-04 |
| Gm12183       | 1.78  | 9.36E-10 |
| Gm15441       | 1.77  | 1.88E-04 |
| Rps13-ps2     | 1.76  | 7.88E-05 |
| Gm8430        | 1.74  | 2.54E-08 |
| Hspa5         | 1.7   | 3.79E-05 |
| Clec2d        | 1.7   | 9.72E-04 |
| Gm26825       | 1.68  | 1.29E-20 |
| Eif4a-ps4     | 1.63  | 9.93E-09 |
| Actg1         | 1.63  | 6.80E-12 |
| Scgb1a1       | 1.63  | 1.90E-19 |
| Gm26917       | 1.61  | 7.71E-46 |
| Jun           | 1.6   | 5.42E-07 |
| Rps23-ps      | 1.6   | 3.89E-04 |
| Zfp36l1       | 1.6   | 9.94E-04 |
| Gm4202        | 1.51  | 1.41E-08 |
| Gm10116       | 1.5   | 4.20E-10 |
| Scarna10      | 1.5   | 2.22E-04 |
| Rps27rt       | 1.48  | 7.24E-09 |
| Tpt1-ps3      | 1.46  | 1.14E-08 |
| 1700020I14Rik | -4.4  | 4.20E-04 |
| Actb          | -1.02 | 4.86E-11 |

|            |        |          |
|------------|--------|----------|
| Acvr1l1    | -4.52  | 1.33E-05 |
| Adrb1      | -7.43  | 1.10E-06 |
| Ager       | -2.25  | 1.51E-10 |
| Akap5      | -3.9   | 1.73E-10 |
| Aplnr      | -11.92 | 1.44E-09 |
| Calcr1     | -14.56 | 2.15E-08 |
| Calr       | -3.1   | 3.59E-06 |
| Cbr2       | -3.35  | 1.49E-34 |
| Ccl21a     | -4.25  | 4.86E-05 |
| Cldn3      | -2.47  | 7.35E-05 |
| Clec14a    | -6.05  | 3.69E-20 |
| Clec1a     | -23.52 | 2.98E-04 |
| Cnn2       | -3.2   | 8.24E-04 |
| Crip2      | -3.99  | 1.36E-04 |
| Cxcl12     | -9.67  | 5.29E-07 |
| Cxcl15     | -7.77  | 1.20E-28 |
| Cxx1a      | -6.22  | 1.79E-07 |
| Cxx1b      | -8.5   | 9.34E-10 |
| Cyp2f2     | -4.34  | 5.27E-08 |
| Dynll1     | -8.19  | 6.41E-06 |
| Dynlt1-ps1 | -5.22  | 8.25E-19 |
| Ear-ps2    | -10.23 | 1.14E-09 |
| Ear2       | -4.53  | 4.29E-11 |
| Egfl7      | -10.14 | 6.36E-08 |
| Eid1       | -4.02  | 4.61E-04 |
| Elovl1     | -4.94  | 3.99E-06 |
| Fzd2       | -20.73 | 5.57E-04 |
| Gm10080    | -2.06  | 2.44E-04 |
| Gm10123    | -2.3   | 1.80E-15 |
| Gm10175    | -3.68  | 5.37E-10 |
| Gm10179    | -5.09  | 3.05E-04 |
| Gm10193    | -3.84  | 1.26E-04 |
| Gm10243    | -3.48  | 3.52E-04 |
| Gm10263    | -2.57  | 5.67E-13 |
| Gm10275    | -1.86  | 9.40E-07 |
| Gm10288    | -1.82  | 4.53E-06 |
| Gm10800    | -16.28 | 1.67E-25 |
| Gm11223    | -6.48  | 1.10E-07 |
| Gm11808    | -1.9   | 1.05E-09 |
| Gm12184    | -3.29  | 8.33E-04 |
| Gm13443    | -2.93  | 1.79E-05 |
| Gm13502    | -6.55  | 1.19E-06 |
| Gm13597    | -3.22  | 2.44E-04 |

|           |        |          |
|-----------|--------|----------|
| Gm15501   | -1.88  | 1.90E-05 |
| Gm15772   | -1.93  | 4.52E-09 |
| Gm15920   | -14.01 | 1.05E-05 |
| Gm22179   | -2.33  | 5.81E-08 |
| Gm2423    | -2.37  | 1.24E-04 |
| Gm24265   | -5.72  | 6.39E-10 |
| Gm26191   | -1.94  | 6.45E-07 |
| Gm4294    | -3.6   | 6.70E-07 |
| Gm5525    | -3.34  | 3.41E-04 |
| Gm5644    | -2.81  | 7.97E-06 |
| Gm6166    | -3.53  | 2.88E-04 |
| Gm6969    | -2.18  | 6.55E-04 |
| Gm6984    | -2.57  | 1.89E-04 |
| Gm7536    | -1.73  | 1.35E-05 |
| Gm8186    | -3.44  | 4.63E-04 |
| Gm8894    | -2.76  | 3.86E-06 |
| Gm9770    | -2.86  | 9.90E-07 |
| Gm9824    | -8.25  | 7.92E-05 |
| Gm9840    | -3.49  | 7.92E-04 |
| Gm9844_1  | -4.73  | 2.01E-04 |
| H1f0      | -4.66  | 1.56E-08 |
| Hist1h1a  | -5.29  | 3.56E-04 |
| Hist1h1d  | -3.05  | 1.46E-04 |
| Hist1h1e  | -3.02  | 9.34E-15 |
| Hist1h2ac | -7.89  | 2.26E-04 |
| Hist1h2ai | -5.32  | 3.34E-05 |
| Hist1h2ak | -4.71  | 2.83E-04 |
| Hist1h2al | -2.72  | 1.91E-06 |
| Hist1h2ap | -3.18  | 2.78E-05 |
| Hist1h2bg | -2.56  | 3.66E-04 |
| Hist1h2bk | -4.14  | 1.20E-06 |
| Hist1h2bl | -6.01  | 8.41E-10 |
| Hist1h2bm | -10.92 | 3.26E-06 |
| Hist1h3b  | -3.87  | 4.63E-04 |
| Hist1h3d  | -6.85  | 1.11E-09 |
| Hist1h4c  | -3.1   | 3.53E-07 |
| Hist1h4d  | -2.59  | 1.95E-11 |
| Hist1h4h  | -4.91  | 1.63E-21 |
| Hist1h4i  | -4.2   | 5.75E-04 |
| Hist1h4n  | -5.62  | 8.51E-16 |
| Hist2h2ac | -5.41  | 3.03E-06 |
| Hist2h3c2 | -5.4   | 4.97E-04 |
| Hist2h4   | -4.78  | 1.62E-04 |

|               |        |          |
|---------------|--------|----------|
| Hpgd          | -15.86 | 2.27E-05 |
| Hspa1a        | -42.43 | 4.49E-12 |
| Hspa1b        | -12.06 | 8.83E-17 |
| Igkc          | -2.42  | 8.31E-07 |
| Inmt          | -4.49  | 3.36E-27 |
| Lbh           | -22.94 | 9.36E-08 |
| Lgi3          | -5.9   | 5.31E-05 |
| Lyz2          | -2.62  | 1.16E-27 |
| Malat1        | -1.19  | 4.60E-04 |
| Mfap4         | -2.15  | 4.15E-04 |
| Mrfap1        | -2.31  | 7.88E-05 |
| Mrpl34        | -9.54  | 3.53E-04 |
| mt-Atp6       | -2     | 2.22E-05 |
| mt-Co1        | -1.83  | 1.62E-10 |
| mt-Co2        | -2.04  | 0        |
| mt-Nd4        | -1.67  | 5.81E-06 |
| Nkx2-1        | -6.68  | 1.66E-07 |
| Nr1d1         | -8.88  | 1.33E-04 |
| Nrarp         | -13.36 | 1.78E-04 |
| Nutf2-ps1     | -3.6   | 4.66E-04 |
| Pdpf          | -5.86  | 1.38E-04 |
| Retnla        | -6.91  | 1.94E-05 |
| Rgs2          | -5.25  | 1.16E-05 |
| Rmrp          | -1.72  | 3.91E-07 |
| Rn7sk         | -1.2   | 6.78E-04 |
| Rnf181        | -4.94  | 4.41E-05 |
| Rnu11_1       | -19.81 | 4.42E-04 |
| RP23-187F18.1 | -4     | 3.91E-05 |
| Rpl10-ps3     | -2.61  | 3.04E-06 |
| Rpl10a-ps1    | -1.83  | 3.94E-06 |
| Rpl15         | -4.43  | 2.26E-04 |
| Rpl17-ps9     | -4.19  | 5.78E-17 |
| Rpl19-ps11    | -1.64  | 8.91E-04 |
| Rpl23a-ps3    | -1.71  | 2.83E-04 |
| Rpl31-ps8     | -2.15  | 9.18E-10 |
| Rpl34-ps1     | -1.63  | 3.54E-04 |
| Rpl39-ps      | -2.33  | 4.83E-05 |
| Rps13-ps1     | -1.85  | 3.87E-04 |
| Rps15a-ps7    | -2.25  | 3.77E-05 |
| Rps24-ps3     | -2.51  | 1.53E-10 |
| Rps26-ps1     | -2.66  | 2.35E-04 |
| Rps6-ps4      | -1.83  | 2.70E-06 |
| Rsrp1         | -3.87  | 1.66E-07 |



|          |        |          |
|----------|--------|----------|
| Scd1     | -2.62  | 2.34E-11 |
| Scd2     | -2.5   | 1.61E-04 |
| Scgb3a2  | -4.95  | 3.59E-08 |
| Scp2-ps2 | -3.42  | 1.92E-09 |
| Sema3g   | -8.31  | 9.36E-04 |
| Serpinh1 | -4.38  | 3.95E-06 |
| Sftpa1   | -1.8   | 1.67E-06 |
| Sftpb    | -2.97  | 1.22E-09 |
| Sftpc    | -2.9   | 1.94E-22 |
| Slc34a2  | -4.32  | 1.06E-10 |
| Slc9a3r2 | -7.63  | 1.82E-05 |
| Sox17    | -17.44 | 4.41E-04 |
| Sox18    | -37.73 | 1.13E-17 |
| Tbx2     | -4.98  | 1.70E-05 |
| Thbd     | -2.15  | 4.46E-07 |
| Tmsb4x   | -1.79  | 1.11E-05 |
| Tppp3    | -4.4   | 7.77E-05 |
| Tuba1a   | -2.22  | 6.76E-04 |
| Tuba1b   | -2.97  | 7.95E-06 |
| Tubb5    | -3.06  | 3.65E-07 |
